# Supplementary material for: Abstract Profiles of Structural Stability Point to Universal Tendencies, Family-Specific Factors, and Ancient Connections between Languages
Source: PLOS journal article supplement (doi:10.1371/journal.pone.0045198), 2012-09-20
Supplement: S1 (10.1371/journal.pone.0045198.s001) [file journal.pone.0045198.s001.pdf]

# Electronic Supplementary Material S1

## Abstract profiles of structural stability point to universal tendencies, family-specific factors, and ancient connections between languages

Dan Dediu<sup>1,3,\*</sup> and Stephen C. Levinson<sup>2,4</sup>

<sup>1</sup>Language and Genetics, Max Planck Institute for Psycholinguistics, Nijmegen, The Netherlands

<sup>2</sup>Language and Cognition, Max Planck Institute for Psycholinguistics, Nijmegen, The Netherlands

<sup>3</sup>Donders Institute for Brain, Cognition and Behaviour, Radboud University Nijmegen, The Netherlands

<sup>4</sup>Radboud University Nijmegen, The Netherlands

\* Dan Dediu, E-mail: [Dan.Dediu@mpi.nl](mailto:Dan.Dediu@mpi.nl)

### Summary

This **Electronic Supplementary Material (S1)** includes:

- more information about the *primary data* used in this paper and its coding (**Tables S1, S3, S4 and S15**);
- the relationships between the language family *stability profiles* (**Tables S2 and S5, and Figures S1-S14**);
- the *involvement* of different features in sets maximizing the correlations between geographic and stability distances (**Tables S6-S13**);
- the *combined p-values* (**Tables S14 and S16**);
- the *punctuated evolution* of structural features (**Tables S18 and S19, and Figures S15-S18**); and
- the *R code* implementing the five methods for combining *p-values* (**Table S17**).

The order of these items largely reflects the structure of the paper's main text.

## Table of Contents

### Supplementary Figures

|                                                                                                   |    |
|---------------------------------------------------------------------------------------------------|----|
| <b>Figure S1:</b> Observed Ripley's $K$ for <b>BayesLang</b> .....                                | 5  |
| <b>Figure S2:</b> Observed Ripley's $K$ for <b>MrBayes</b> .....                                  | 6  |
| <b>Figure S3:</b> Stability distances (MDS and NeighborNet) for <b>MBE</b> .....                  | 7  |
| <b>Figure S4:</b> Stability distances (MDS and NeighborNet) for <b>MBW</b> .....                  | 8  |
| <b>Figure S5:</b> Stability distances (MDS and NeighborNet) for <b>MBH</b> .....                  | 9  |
| <b>Figure S6:</b> Stability distances (MDS and NeighborNet) for <b>MPE</b> .....                  | 10 |
| <b>Figure S7:</b> Stability distances (MDS and NeighborNet) for <b>MPW</b> .....                  | 11 |
| <b>Figure S8:</b> Stability distances (MDS and NeighborNet) for <b>MPH</b> .....                  | 12 |
| <b>Figure S9:</b> Stability distances (MDS and NeighborNet) for <b>BBE</b> .....                  | 13 |
| <b>Figure S10:</b> Stability distances (MDS and NeighborNet) for <b>BBW</b> .....                 | 14 |
| <b>Figure S11:</b> Stability distances (MDS and NeighborNet) for <b>BBH</b> .....                 | 15 |
| <b>Figure S12:</b> Stability distances (MDS and NeighborNet) for <b>BPE</b> .....                 | 16 |
| <b>Figure S13:</b> Stability distances (MDS and NeighborNet) for <b>BPW</b> .....                 | 17 |
| <b>Figure S14:</b> Stability distances (MDS and NeighborNet) for <b>BPH</b> .....                 | 18 |
| <b>Figure S15:</b> Punctuated evolution across families .....                                     | 64 |
| <b>Figure S16:</b> Punctuated evolution across categories of structural features .....            | 65 |
| <b>Figure S17:</b> Punctuated evolution: means across families and categories .....               | 66 |
| <b>Figure S18:</b> Punctuated evolution: standard deviations across families and categories ..... | 67 |

### Supplementary Tables

|                                                                                                 |    |
|-------------------------------------------------------------------------------------------------|----|
| <b>Table S1:</b> The 12 datasets .....                                                          | 3  |
| <b>Table S2:</b> Observed versus expected stability distances .....                             | 4  |
| <b>Table S3:</b> The structural features and their coding .....                                 | 22 |
| <b>Table S4:</b> The composition and structure of the language families.....                    | 36 |
| <b>Table S5:</b> Mantel correlations between stability and geographic distances .....           | 37 |
| <b>Table S6:</b> Most involved features for dataset <b>MBE</b> .....                            | 38 |
| <b>Table S7:</b> Most involved features for dataset <b>MBW</b> .....                            | 39 |
| <b>Table S8:</b> Most involved features for dataset <b>MPE</b> .....                            | 40 |
| <b>Table S9:</b> Most involved features for dataset <b>MPW</b> .....                            | 41 |
| <b>Table S10:</b> Most involved features for dataset <b>BBE</b> .....                           | 41 |
| <b>Table S11:</b> Most involved features for dataset <b>BBW</b> .....                           | 42 |
| <b>Table S12:</b> Most involved features for dataset <b>BPE</b> .....                           | 43 |
| <b>Table S13:</b> Most involved features for dataset <b>BPW</b> .....                           | 44 |
| <b>Table S14:</b> Correlations and concordances between methods for combining $p$ -values ..... | 45 |
| <b>Table S15:</b> The composition and interpretation of sets of language families.....          | 54 |
| <b>Table S16:</b> Statistical robustness of sets of language families.....                      | 56 |
| <b>Table S17:</b> The <b>R</b> code implementing the methods for combining $p$ -values .....    | 59 |
| <b>Table S18:</b> Punctuated evolution across language families .....                           | 61 |
| <b>Table S19:</b> Punctuated evolution across categories of structural features .....           | 59 |

| Dataset    | Software  | Coding | Classification | Structural features | Language families | Languages |
|------------|-----------|--------|----------------|---------------------|-------------------|-----------|
| <b>MBE</b> | MrBayes   | Binary | Ethnologue     | 86                  | 33                | 320       |
| <b>MBW</b> |           |        | WALS           | 86                  | 25                | 255       |
| <b>MBH</b> |           |        | HH             | 86                  | 38                | 459       |
| <b>MPE</b> |           | Poly   | Etnologue      | 70                  | 34                | 319       |
| <b>MPW</b> |           |        | WALS           | 68                  | 18                | 162       |
| <b>MPH</b> |           |        | HH             | 74                  | 39                | 420       |
| <b>BBE</b> | BayesLang | Binary | Ethnologue     | 86                  | 39                | 303       |
| <b>BBW</b> |           |        | WALS           | 86                  | 26                | 266       |
| <b>BBH</b> |           |        | HH             | 86                  | 38                | 458       |
| <b>BPE</b> |           | Poly   | Ethnologue     | 70                  | 28                | 195       |
| <b>BPW</b> |           |        | WALS           | 70                  | 25                | 249       |
| <b>BPH</b> |           |        | HH             | 70                  | 38                | 430       |

**Table S1:** The 12 datasets resulting from the combination of software packages, codings and historical linguistic classifications, with the number of structural features, language families and languages processed. For MrBayes all outgroups have been combined. For details see main text and [6].

| Case | Diag | Measure | Observed | Simulated |       |               | p-value            |
|------|------|---------|----------|-----------|-------|---------------|--------------------|
|      |      |         |          | Mean      | SD    | SDs from mean |                    |
| MBE  | 9.27 | NN      | 2.222    | 3.304     | 0.039 | 27.957        | < 10 <sup>-4</sup> |
|      |      | Mean    | 2.749    | 3.664     | 0.032 | 28.940        | < 10 <sup>-4</sup> |
| MBW  | 9.27 | NN      | 2.570    | 3.333     | 0.045 | 17.073        | < 10 <sup>-4</sup> |
|      |      | Mean    | 3.017    | 3.627     | 0.037 | 16.496        | < 10 <sup>-4</sup> |
| MBH  | 9.27 | NN      | 2.207    | 3.289     | 0.036 | 30.434        | < 10 <sup>-4</sup> |
|      |      | Mean    | 2.736    | 3.682     | 0.030 | 31.858        | < 10 <sup>-4</sup> |
| MPE  | 8.37 | NN      | 2.024    | 2.930     | 0.038 | 23.887        | < 10 <sup>-4</sup> |
|      |      | Mean    | 2.484    | 3.308     | 0.032 | 26.121        | < 10 <sup>-4</sup> |
| MPW  | 8.25 | NN      | 2.366    | 2.948     | 0.055 | 10.591        | < 10 <sup>-4</sup> |
|      |      | Mean    | 2.641    | 3.171     | 0.044 | 12.055        | < 10 <sup>-4</sup> |
| MPH  | 8.60 | NN      | 2.162    | 3.011     | 0.035 | 24.578        | < 10 <sup>-4</sup> |
|      |      | Mean    | 2.642    | 3.416     | 0.029 | 26.521        | < 10 <sup>-4</sup> |
| BBE  | 9.27 | NN      | 1.413    | 3.289     | 0.035 | 53.805        | < 10 <sup>-4</sup> |
|      |      | Mean    | 2.147    | 3.681     | 0.029 | 52.111        | < 10 <sup>-4</sup> |
| BBW  | 9.27 | NN      | 1.990    | 3.329     | 0.044 | 30.314        | < 10 <sup>-4</sup> |
|      |      | Mean    | 2.561    | 3.633     | 0.036 | 29.395        | < 10 <sup>-4</sup> |
| BBH  | 9.27 | NN      | 1.494    | 3.288     | 0.035 | 51.428        | < 10 <sup>-4</sup> |
|      |      | Mean    | 2.167    | 3.681     | 0.029 | 51.497        | < 10 <sup>-4</sup> |
| BPE  | 8.37 | NN      | 1.308    | 2.949     | 0.042 | 39.412        | < 10 <sup>-4</sup> |
|      |      | Mean    | 1.823    | 3.285     | 0.035 | 42.051        | < 10 <sup>-4</sup> |
| BPW  | 8.37 | NN      | 1.757    | 2.961     | 0.044 | 27.070        | < 10 <sup>-4</sup> |
|      |      | Mean    | 2.184    | 3.271     | 0.037 | 29.212        | < 10 <sup>-4</sup> |
| BPH  | 8.37 | NN      | 1.378    | 2.916     | 0.035 | 44.006        | < 10 <sup>-4</sup> |
|      |      | Mean    | 1.879    | 3.319     | 0.029 | 48.818        | < 10 <sup>-4</sup> |

**Table S2:** Comparison between the observed stability distances between the actual language families and 10,000 simulations of random language families. **Diag:** the maximum possible stability distance in the stability cube with the number of dimensions equal to the number of features in this case. **Measure:** the summary of the stability distances matrix between language families (**NN** is the average distance to the nearest neighbor; **Mean** is the mean stability distance). **Observed:** the actual value of the measure for the real language families. **Simulated:** 10,000 simulations of random language families in the current stability cube resulting in 10,000 simulated stability distance matrices; for each such simulated matrix the measures as defined above have been computed and the distribution of these 10,000 simulated measures was summarized using their **Mean** and standard deviation (**SD**); **SDs from mean** represents how far is the observed measure from the mean of the simulated measures in terms of the simulated SDs. **P-value:** the empirical probability that the observed measure is outside the simulated distribution.

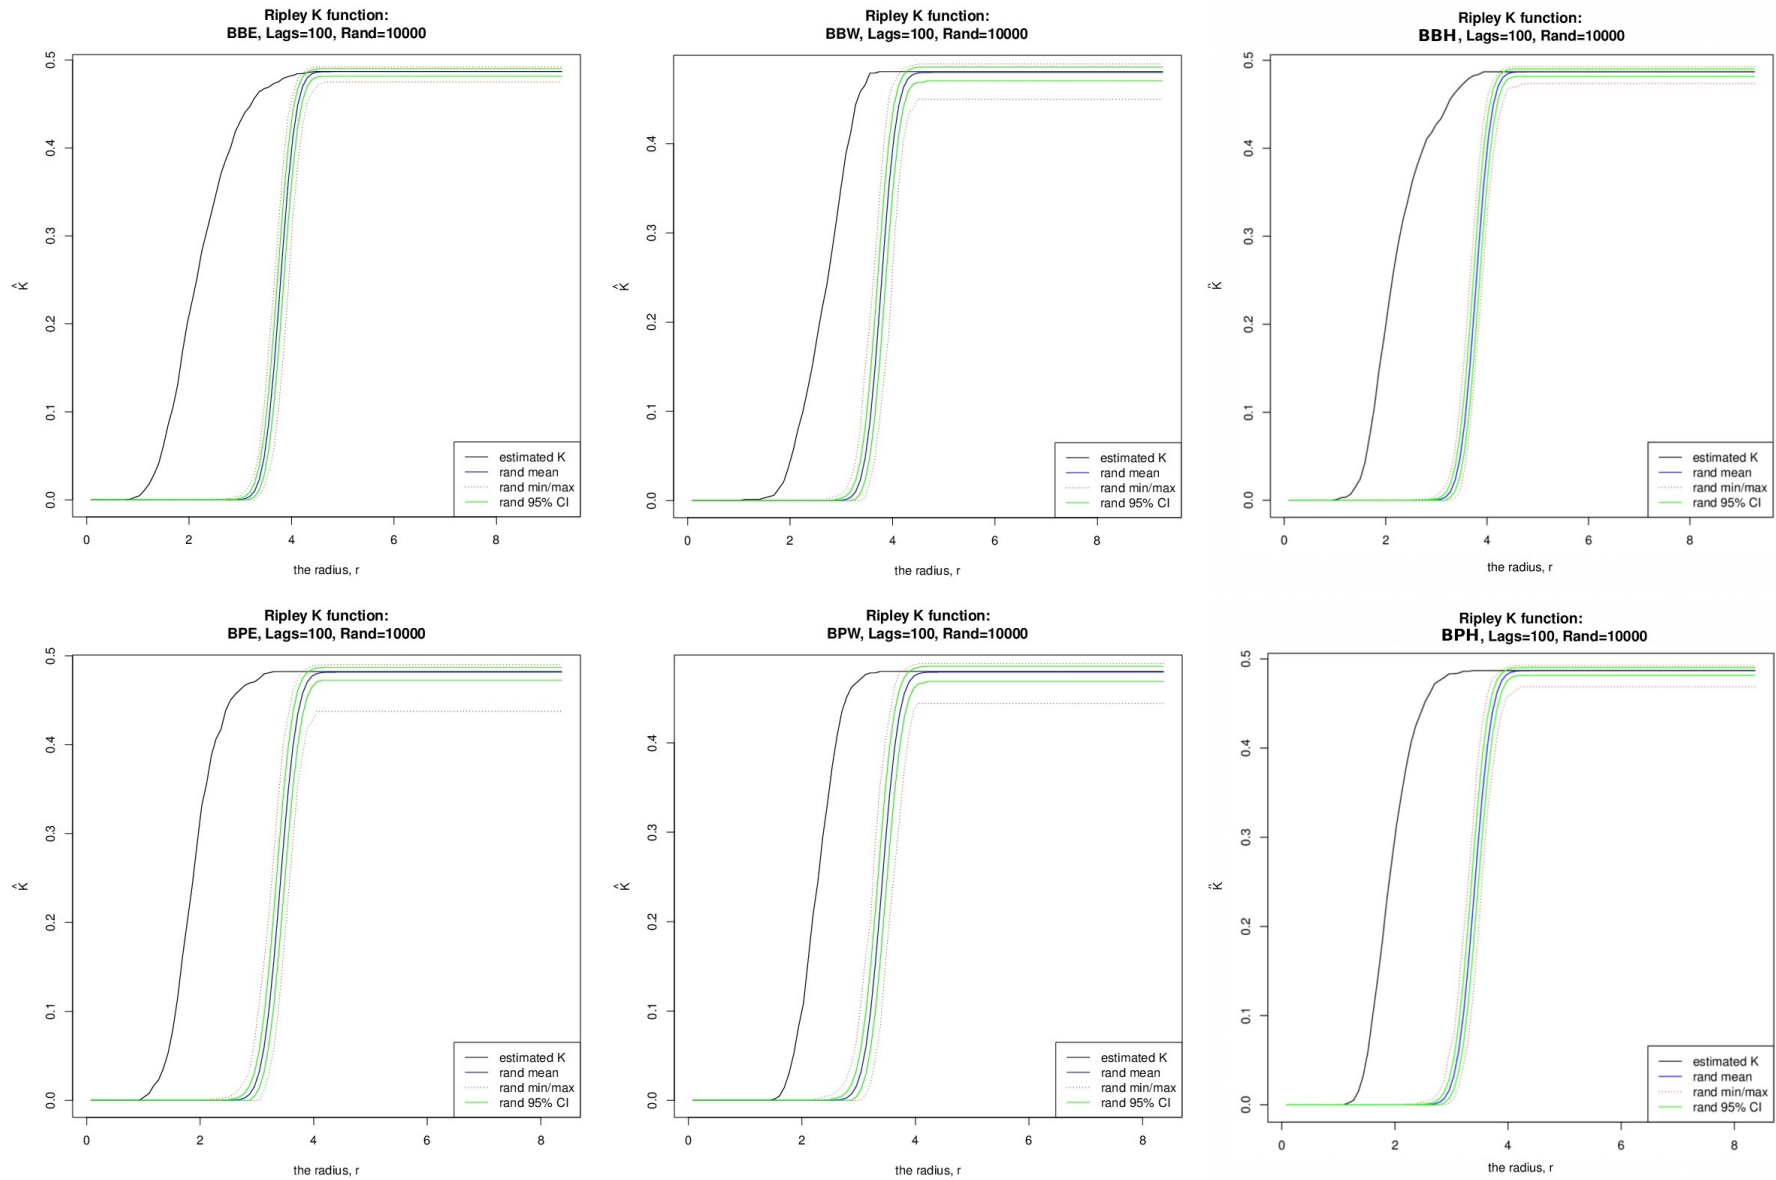

**Figure S1:** The observed Ripley's  $K$  function (computed at 100 lags) for the 4 datasets using BayesLang versus 10,000 simulated Poisson processes. It can be seen that the actually observed values (black) are well outside the 95% confidence interval around the mean randomizations (and, in fact, outside their whole range) for all meaningful values of the radius  $r$ .

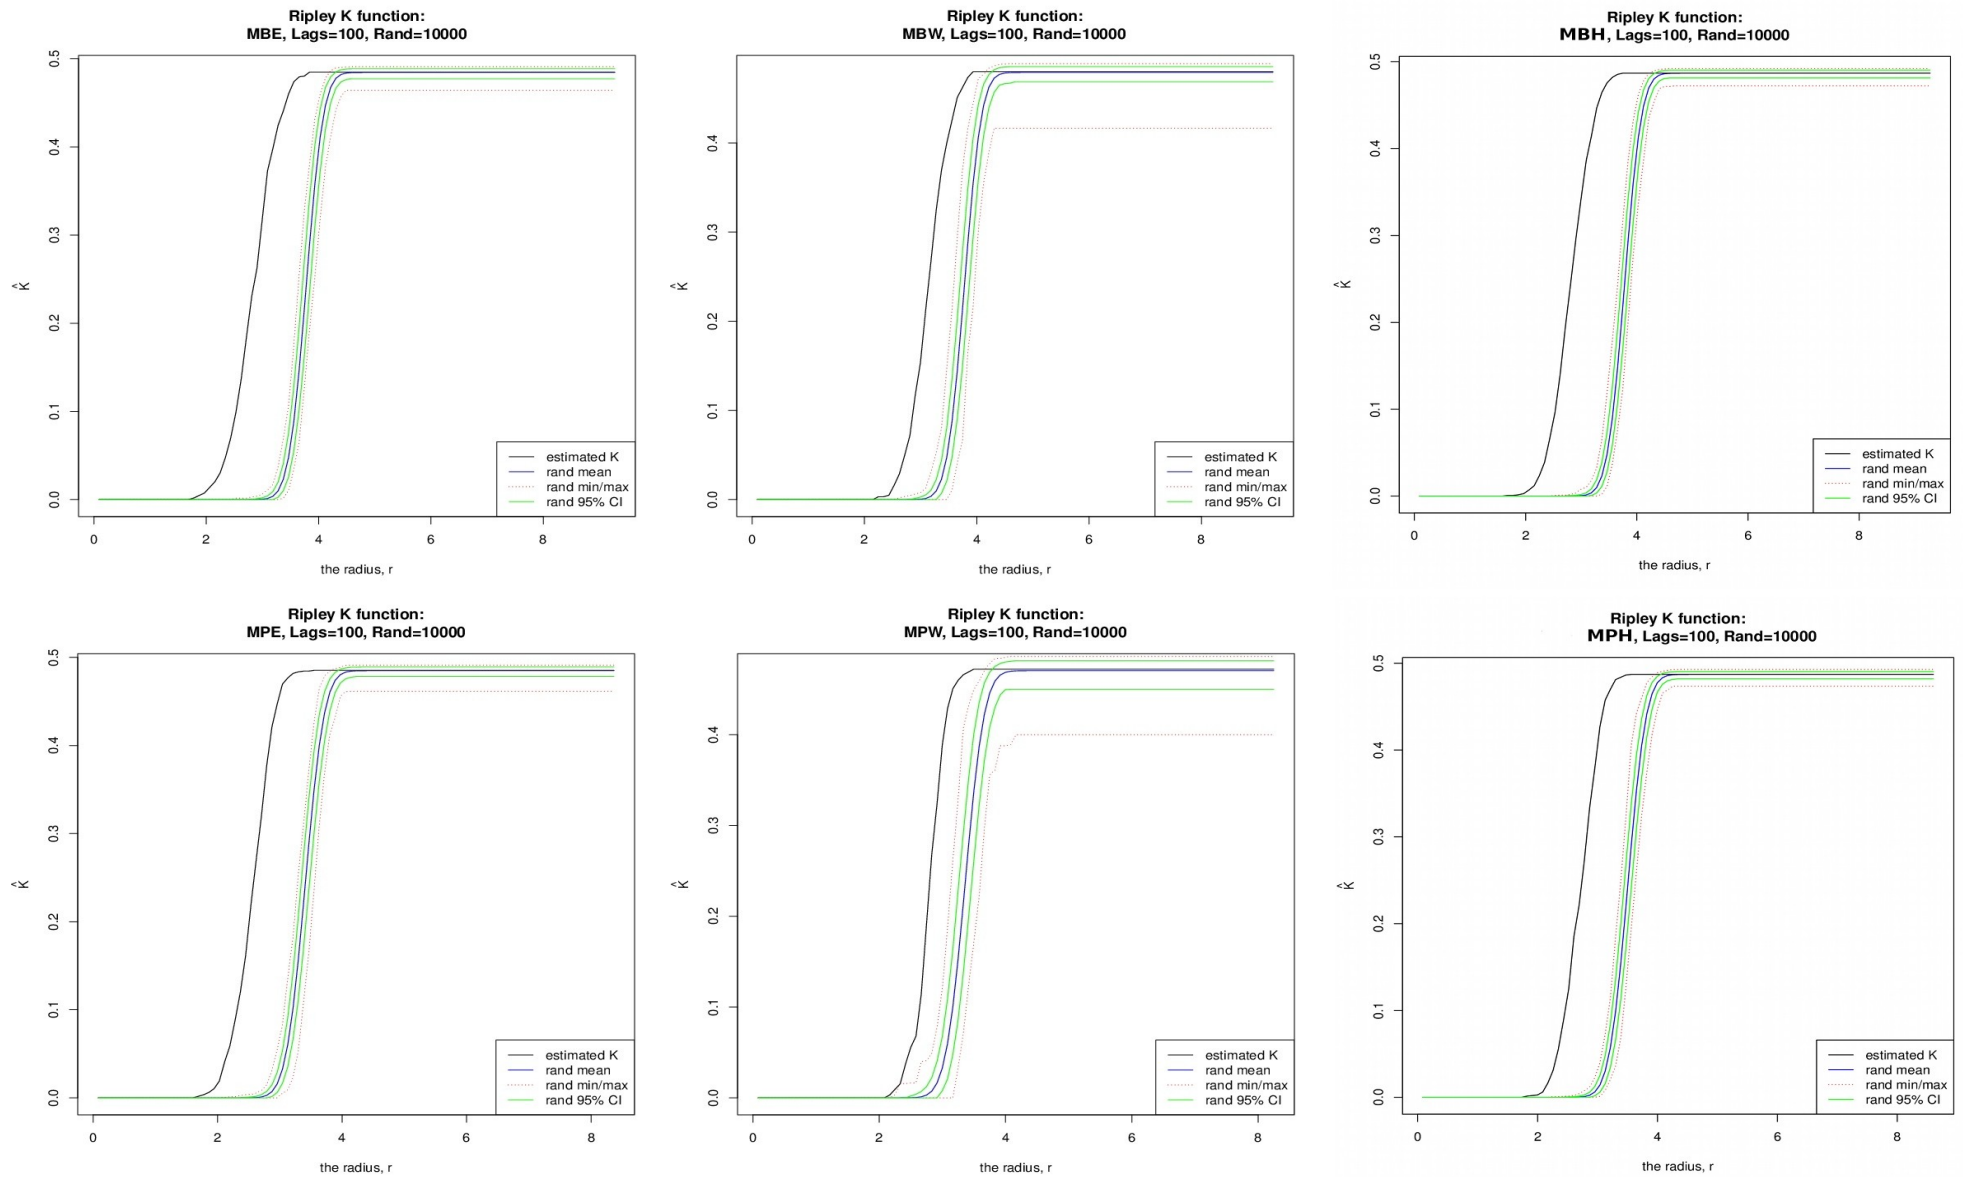

**Figure S2:** The observed Ripley's  $K$  function (computed at 100 lags) for the 4 datasets using MrBayes versus 10,000 simulated Poisson processes. It can be seen that the actually observed values (black) are well outside the 95% confidence interval around the mean randomizations (and, in fact, outside their whole range) for all meaningful values of the radius  $r$ .

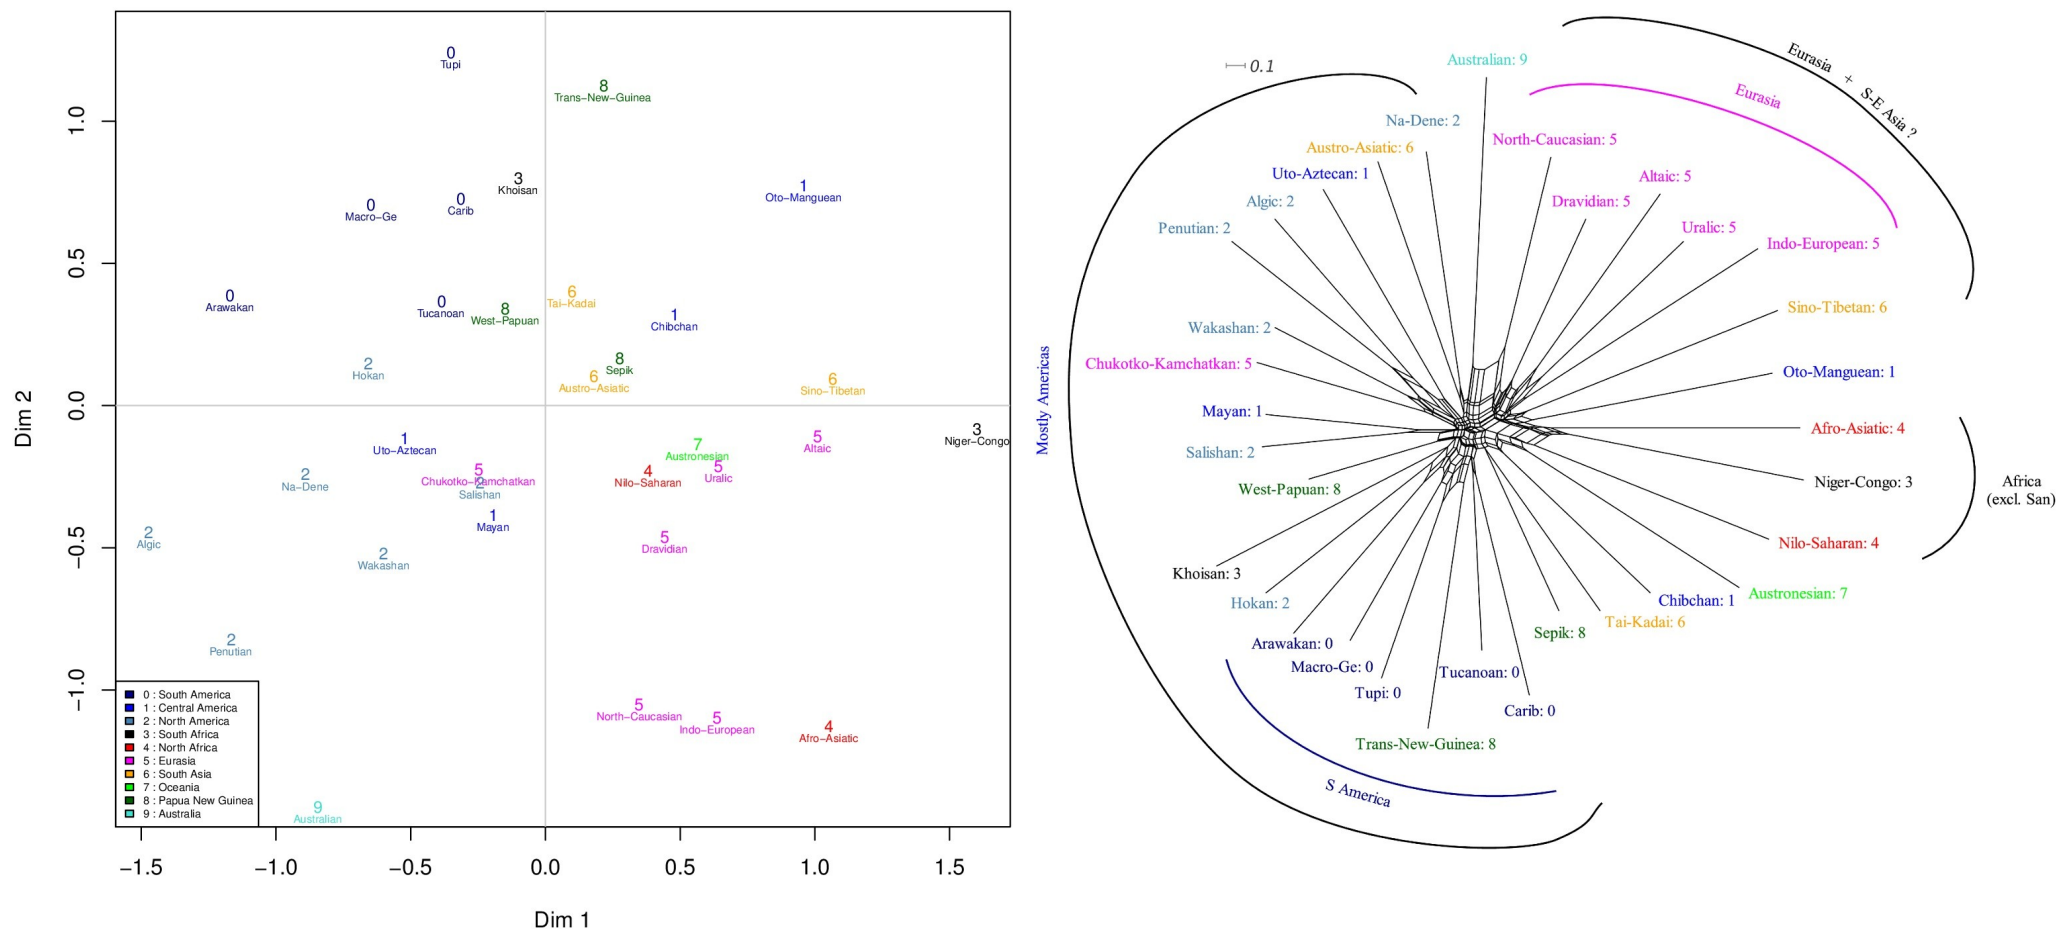

**Figure S3:** MDS (left) and annotated Network (right) representations of the stability distances between language families for dataset **MBE**. Please note that for the MDS plot only the first two dimensions are shown and the scales and directionality of the axes are arbitrary.

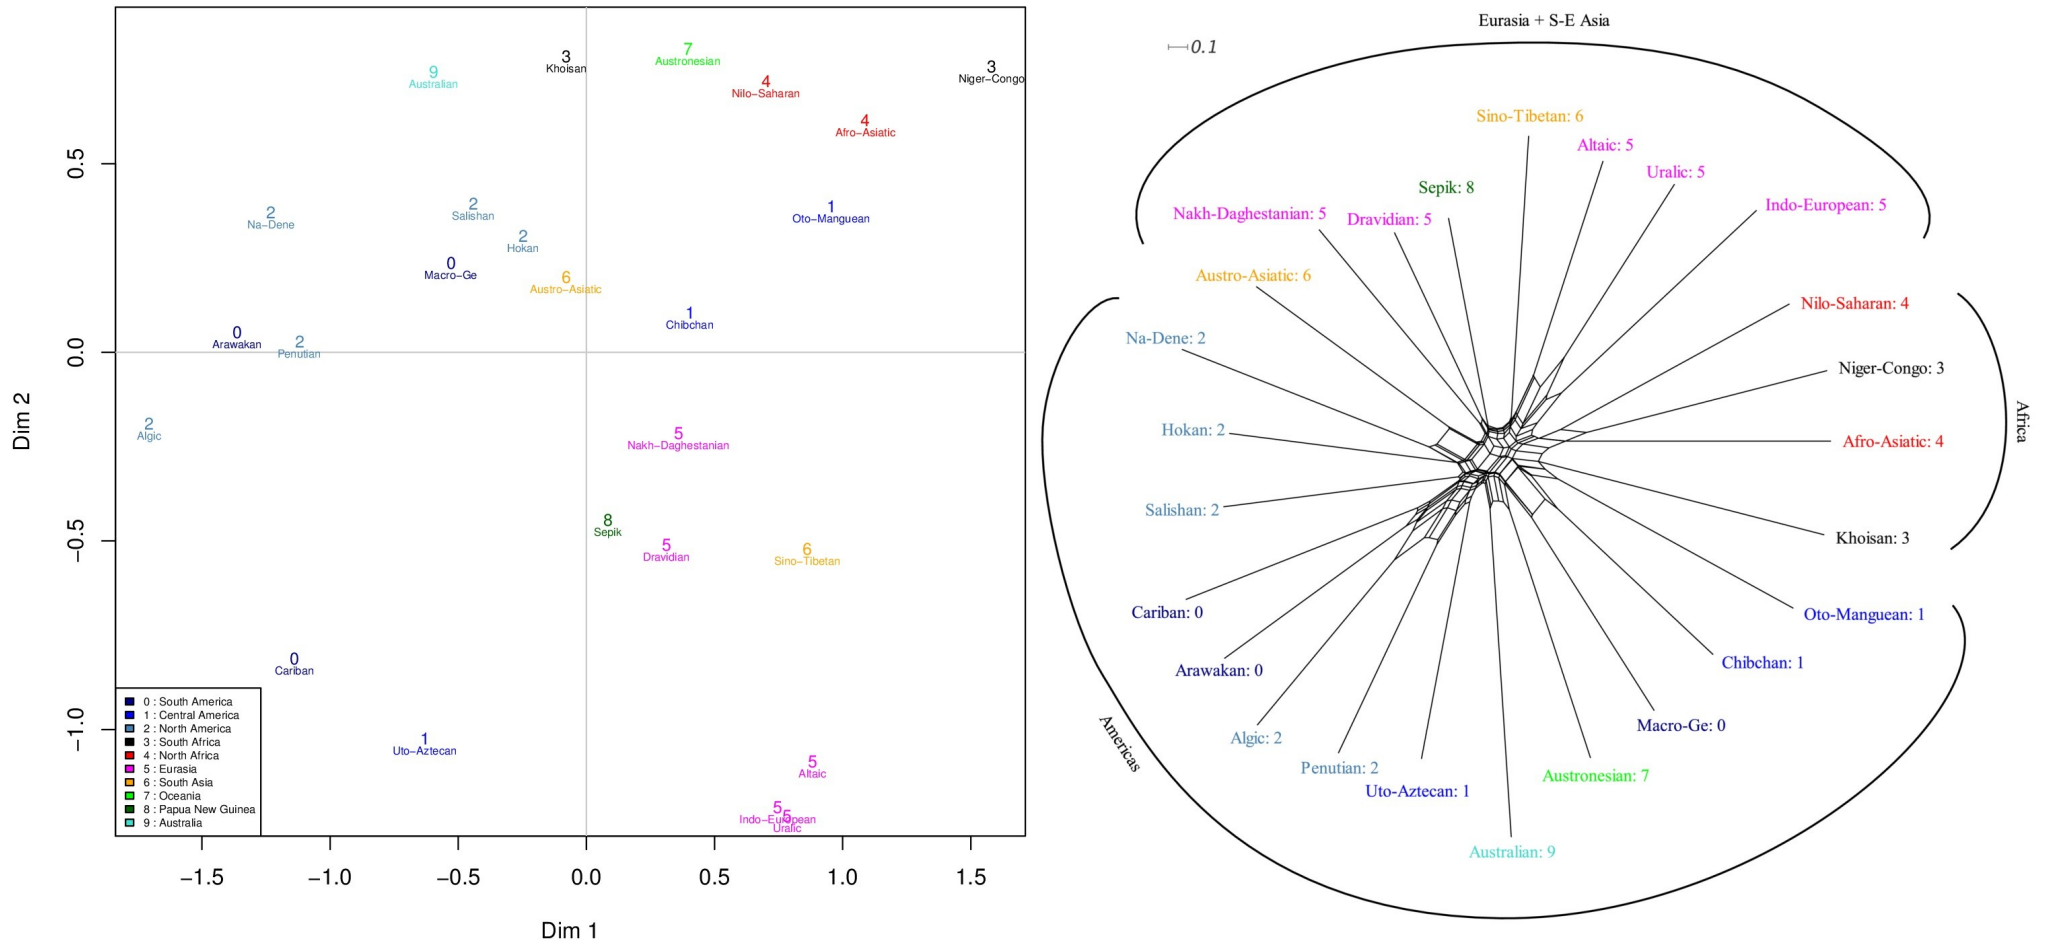

**Figure S4:** MDS (left) and annotated Network (right) representations of the stability distances between language families for dataset **MBW**. Please note that for the MDS plot only the first two dimensions are shown and the scales and directionality of the axes are arbitrary.



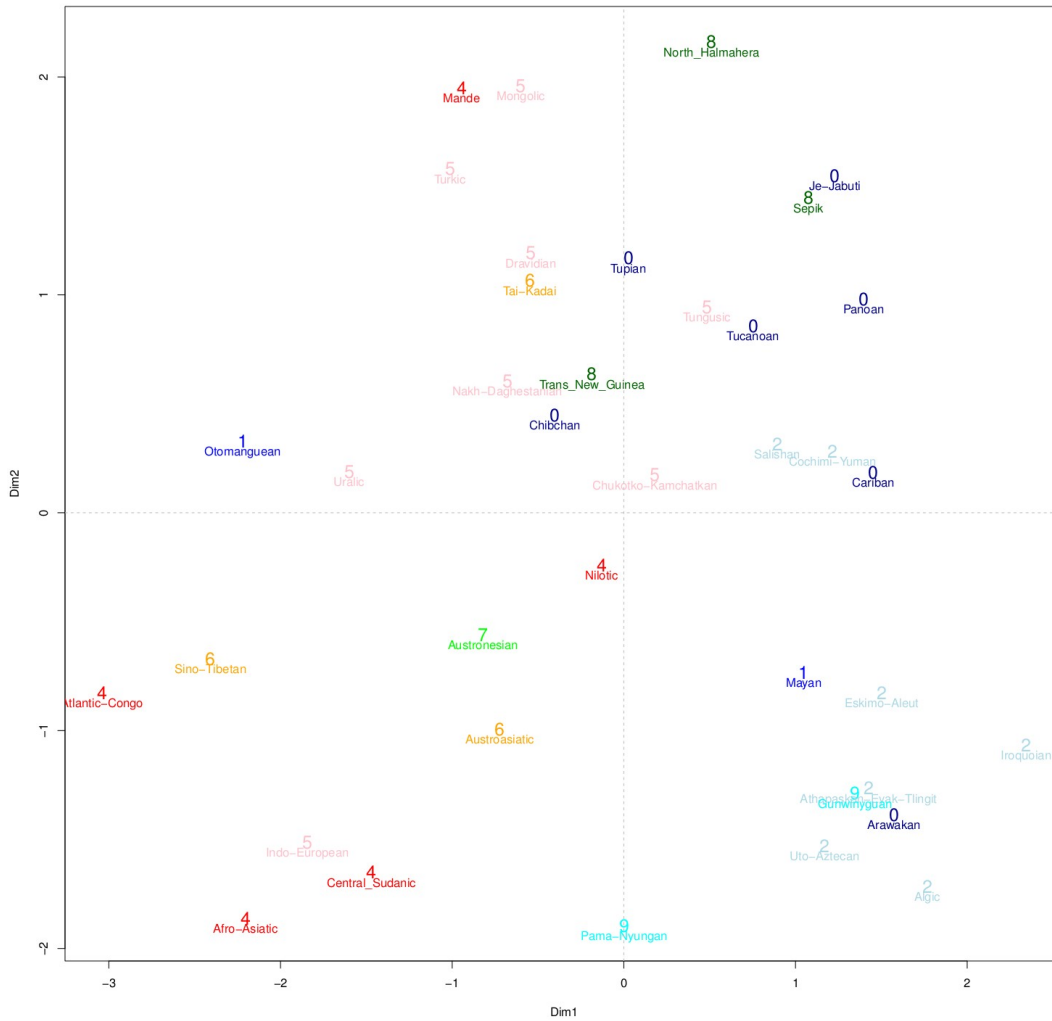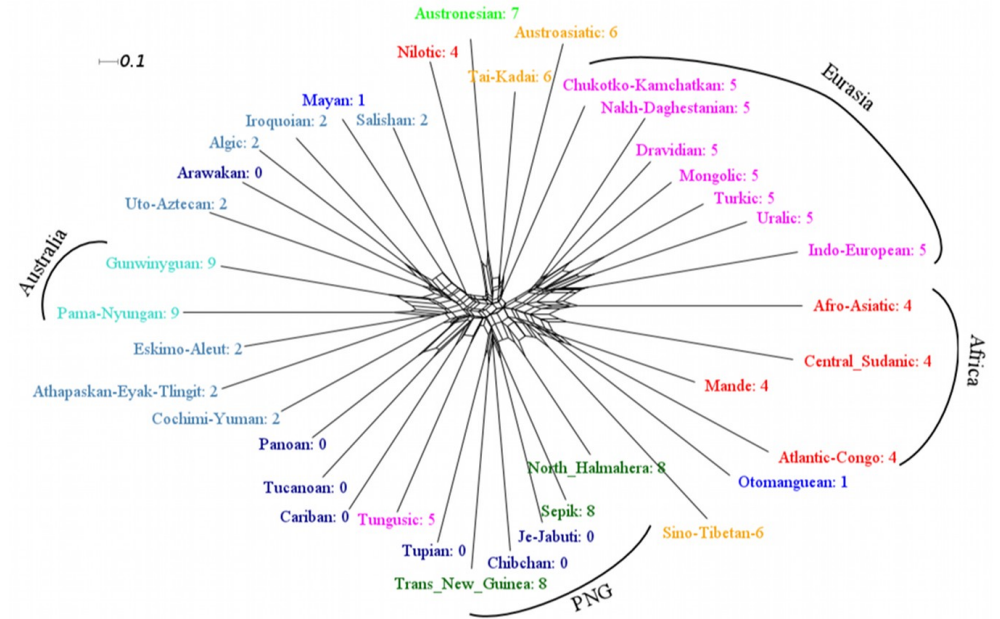

**Figure S5:** MDS (left) and annotated Network (right) representations of the stability distances between language families for dataset **MBH**. Please note that for the MDS plot only the first two dimensions are shown and the scales and directionality of the axes are arbitrary.





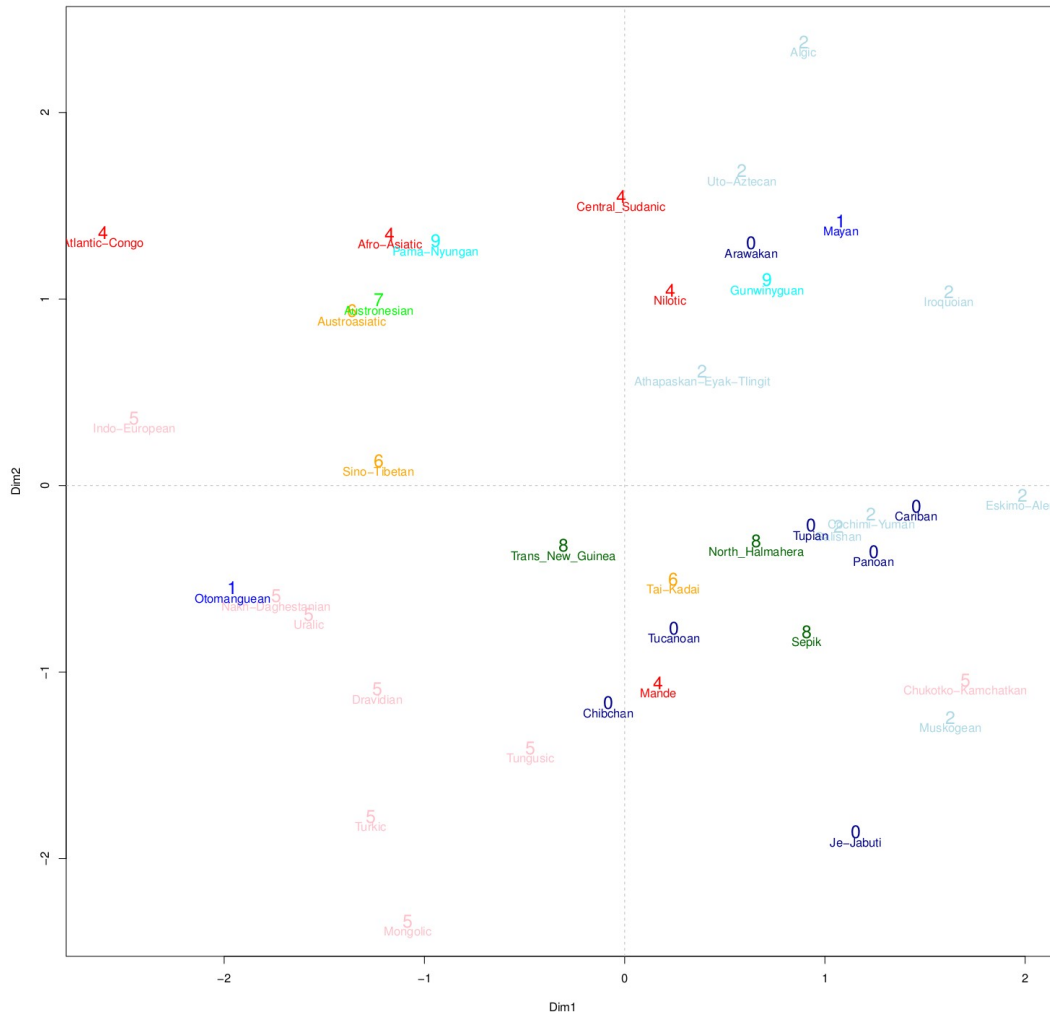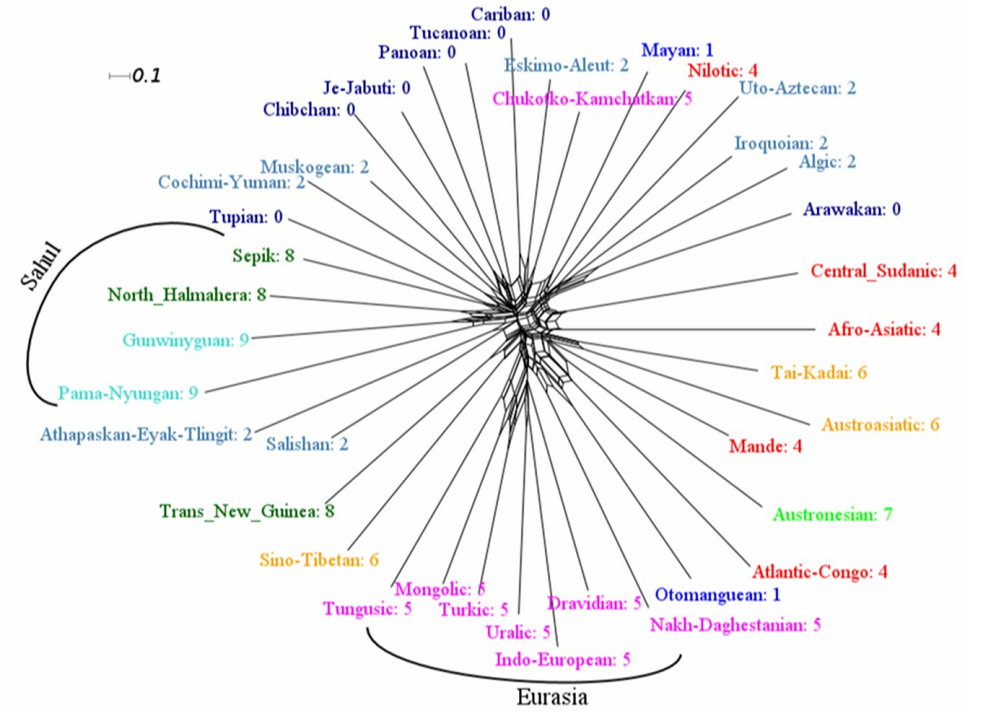

**Figure S8:** MDS (left) and annotated Network (right) representations of the stability distances between language families for dataset MPH. Please note that for the MDS plot only the first two dimensions are shown and the scales and directionality of the axes are arbitrary.

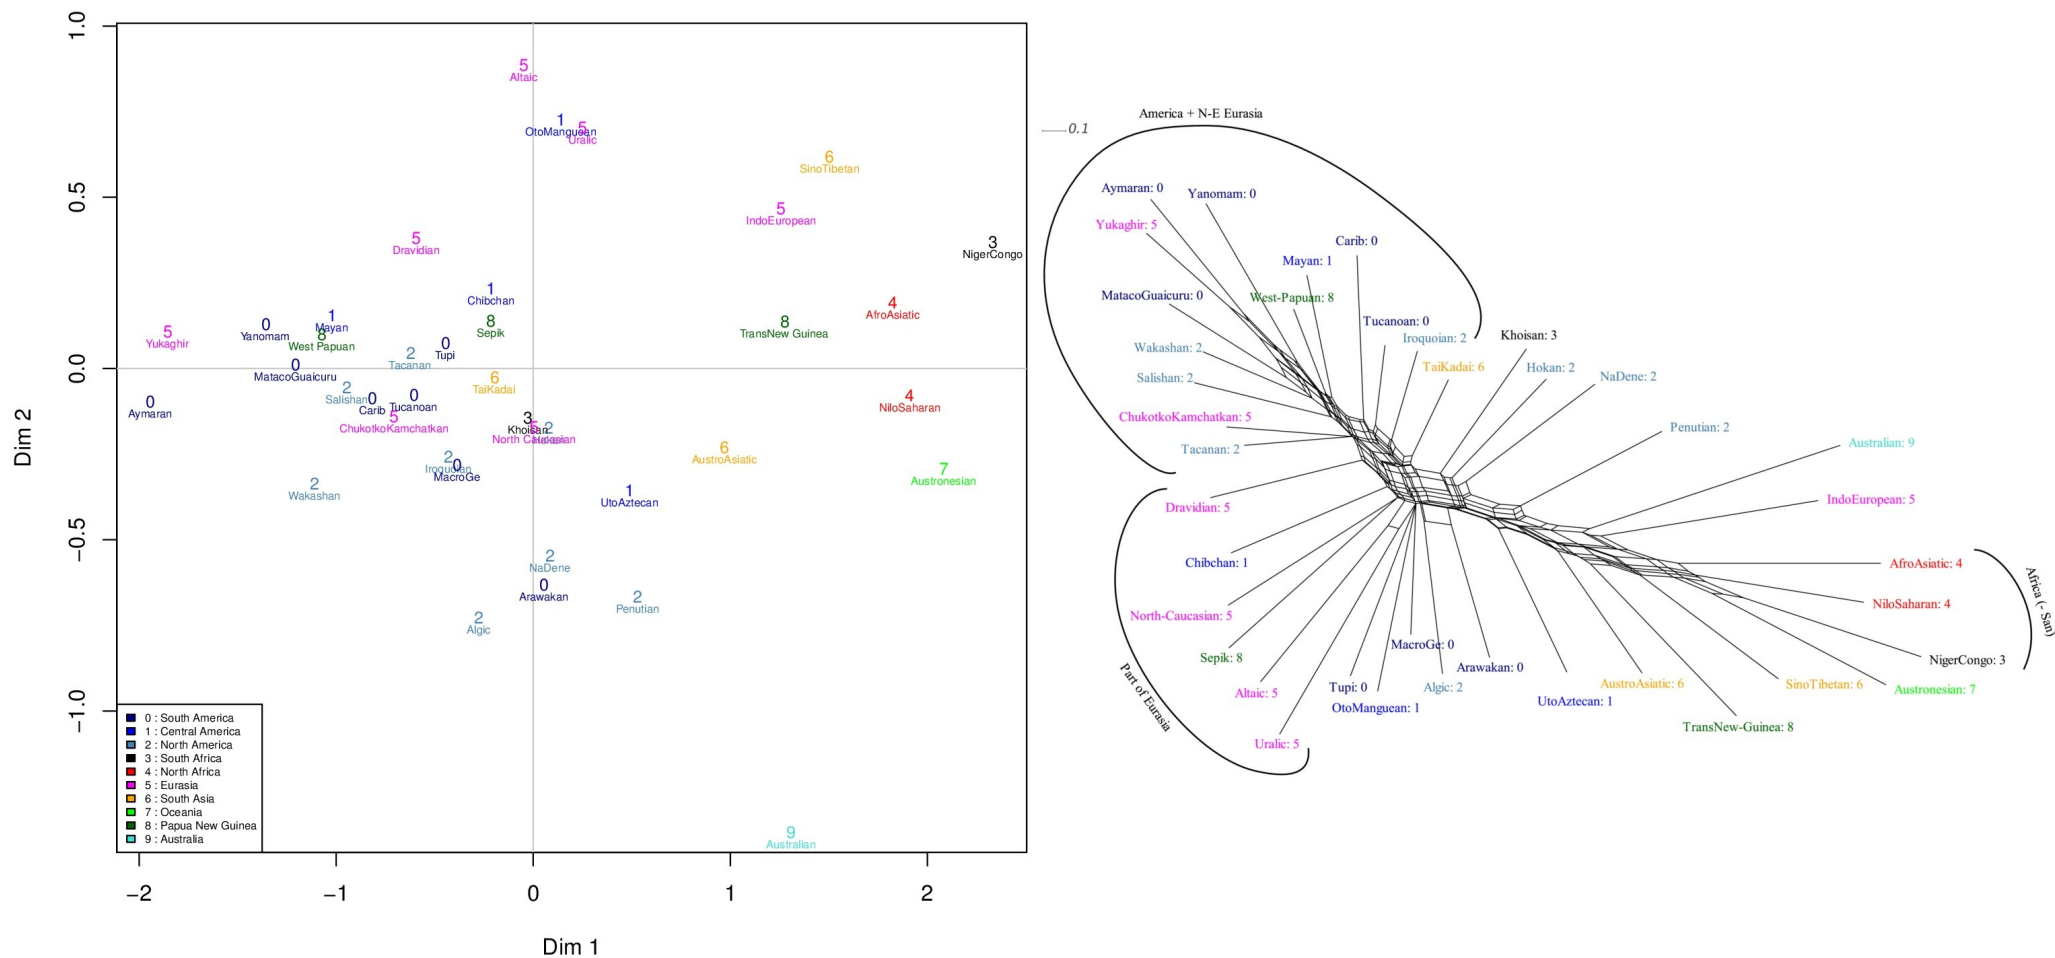

**Figure S9:** MDS (left) and annotated Network (right) representations of the stability distances between language families for dataset **BBE**. Please note that for the MDS plot only the first two dimensions are shown and the scales and directionality of the axes are arbitrary.



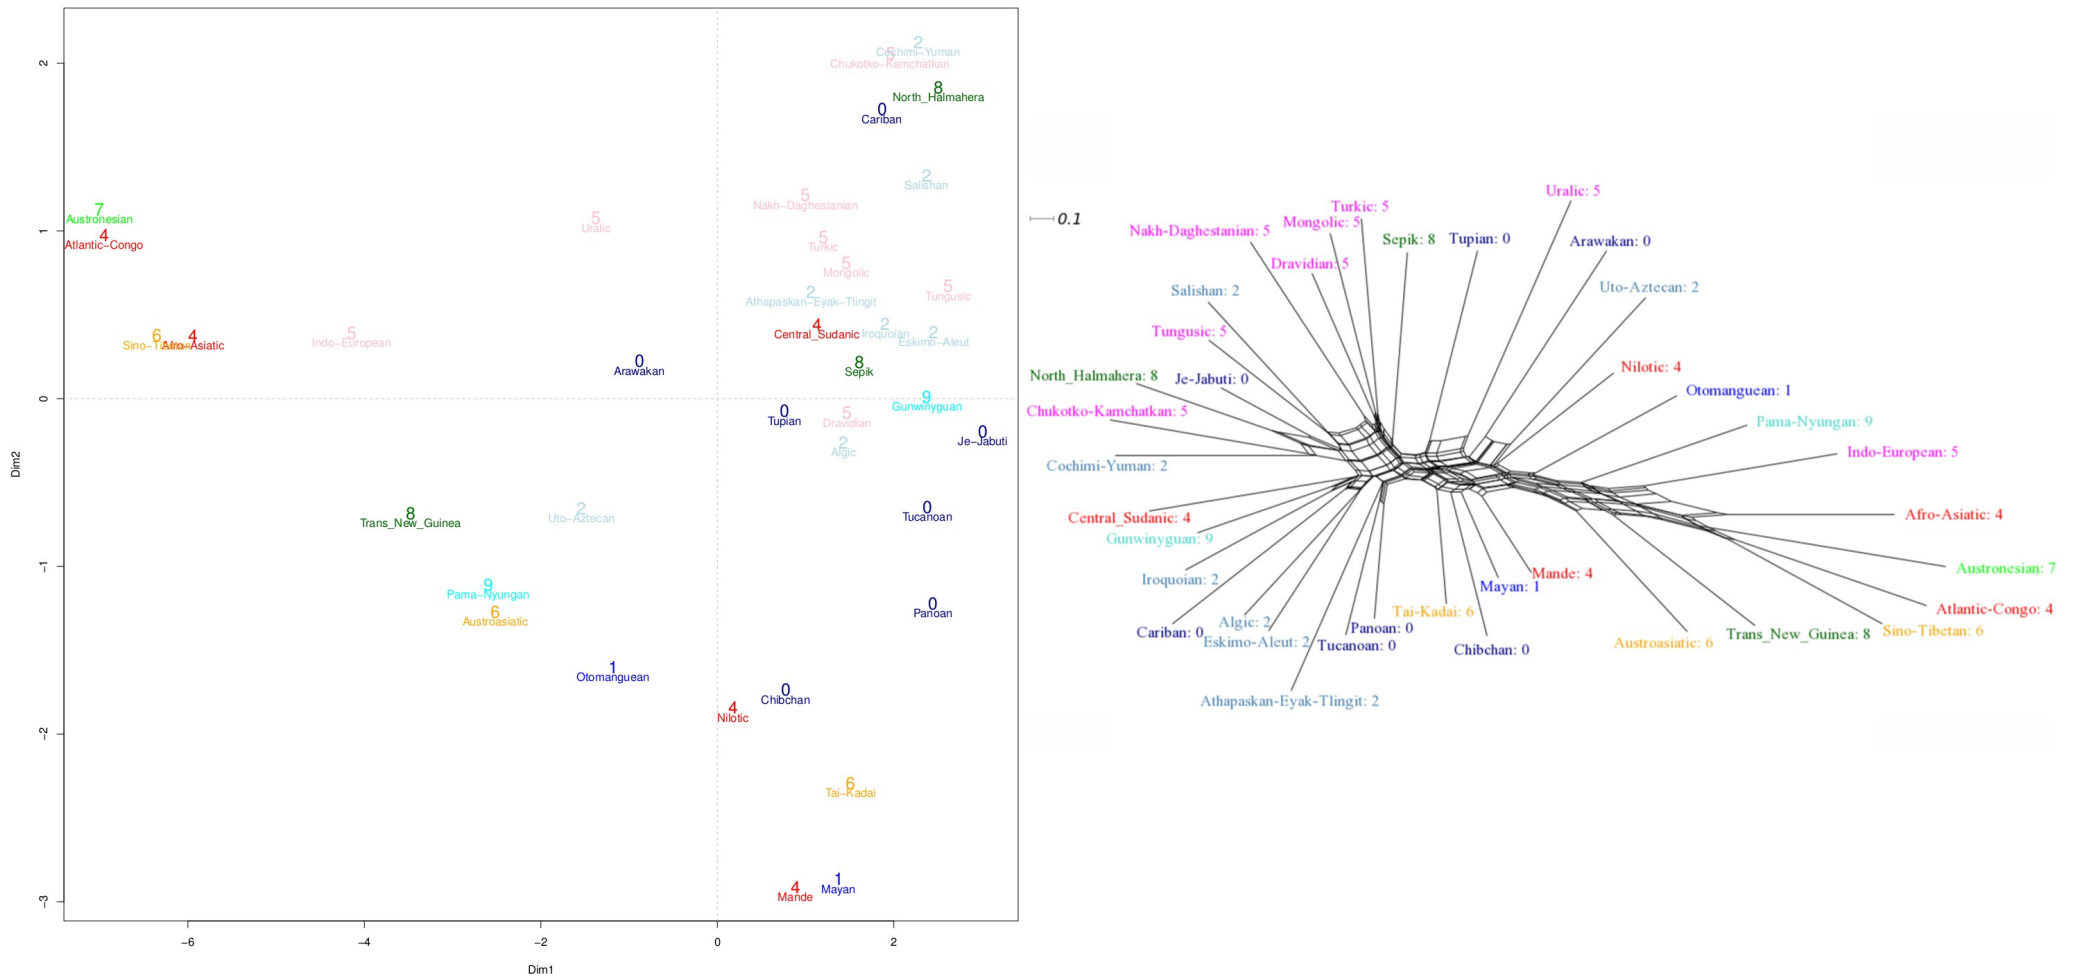

**Figure S11:** MDS (left) and annotated Network (right) representations of the stability distances between language families for dataset **BBH**. Please note that for the MDS plot only the first two dimensions are shown and the scales and directionality of the axes are arbitrary.

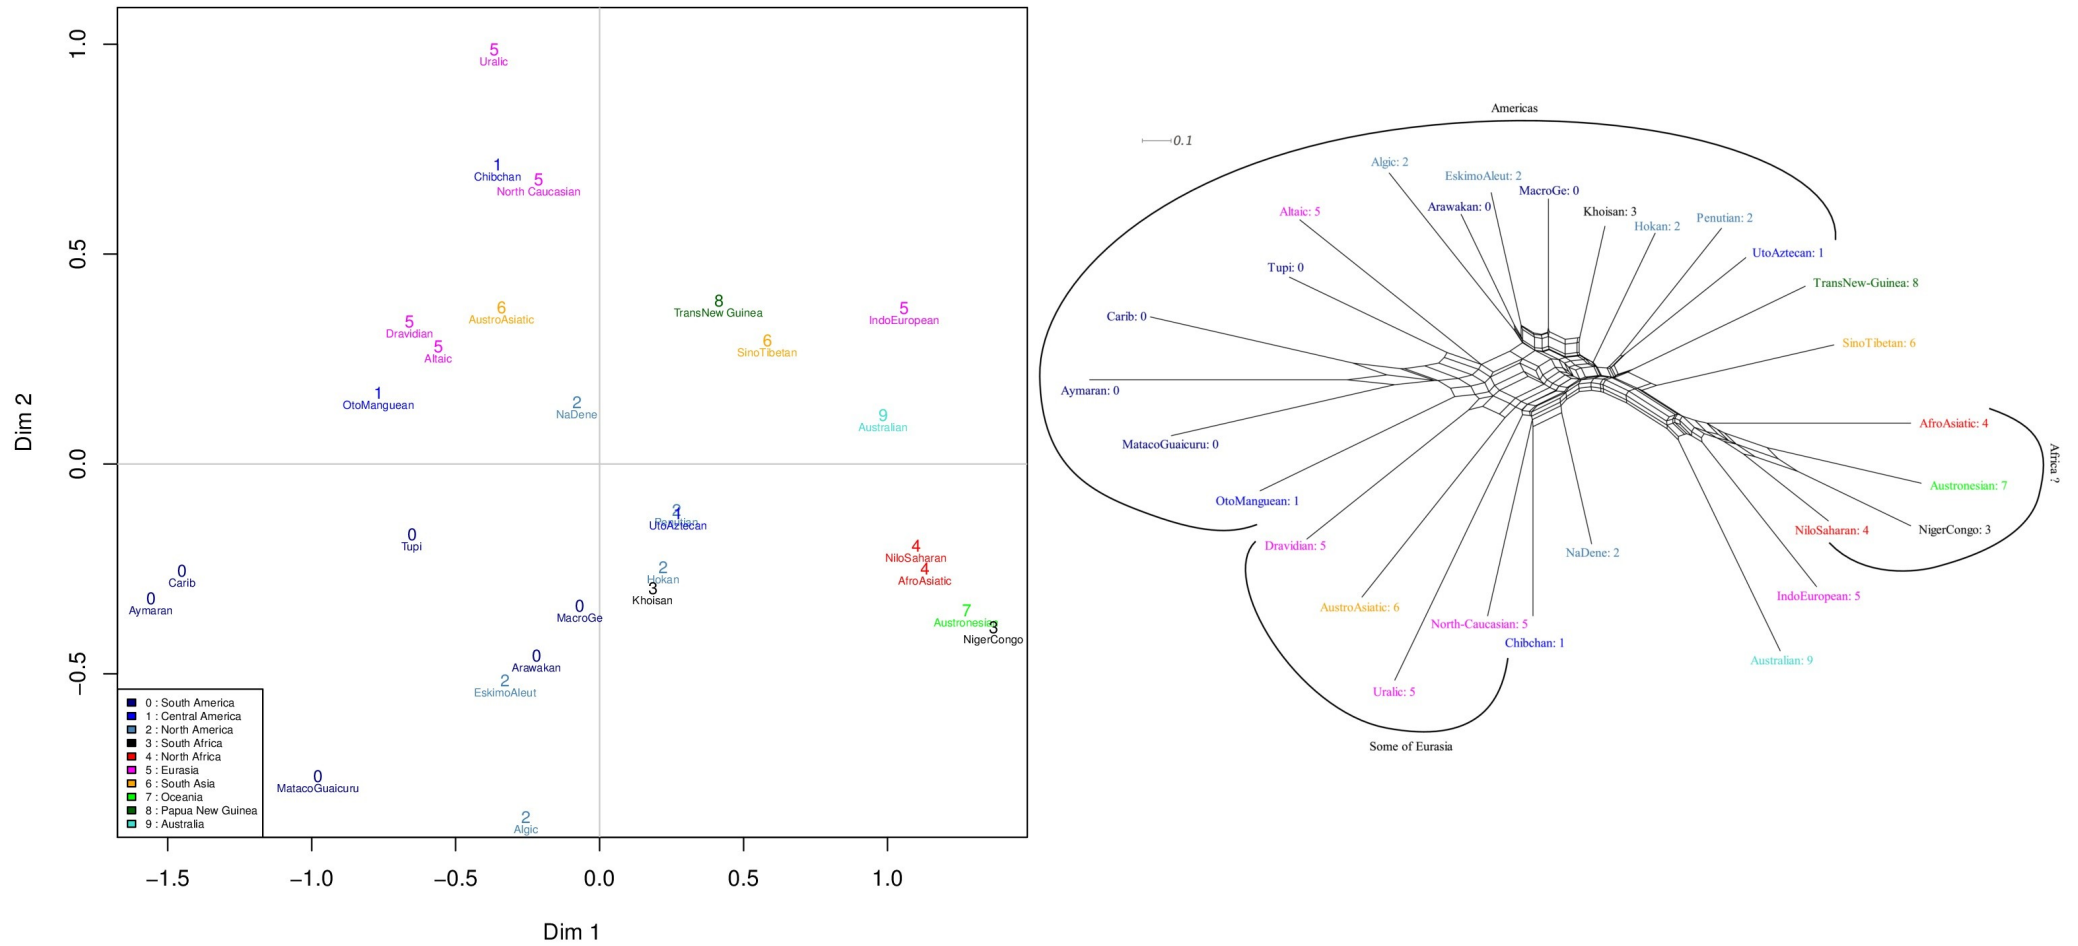

**Figure S12:** MDS (left) and annotated Network (right) representations of the stability distances between language families for dataset **BPE**. Please note that for the MDS plot only the first two dimensions are shown and the scales and directionality of the axes are arbitrary.



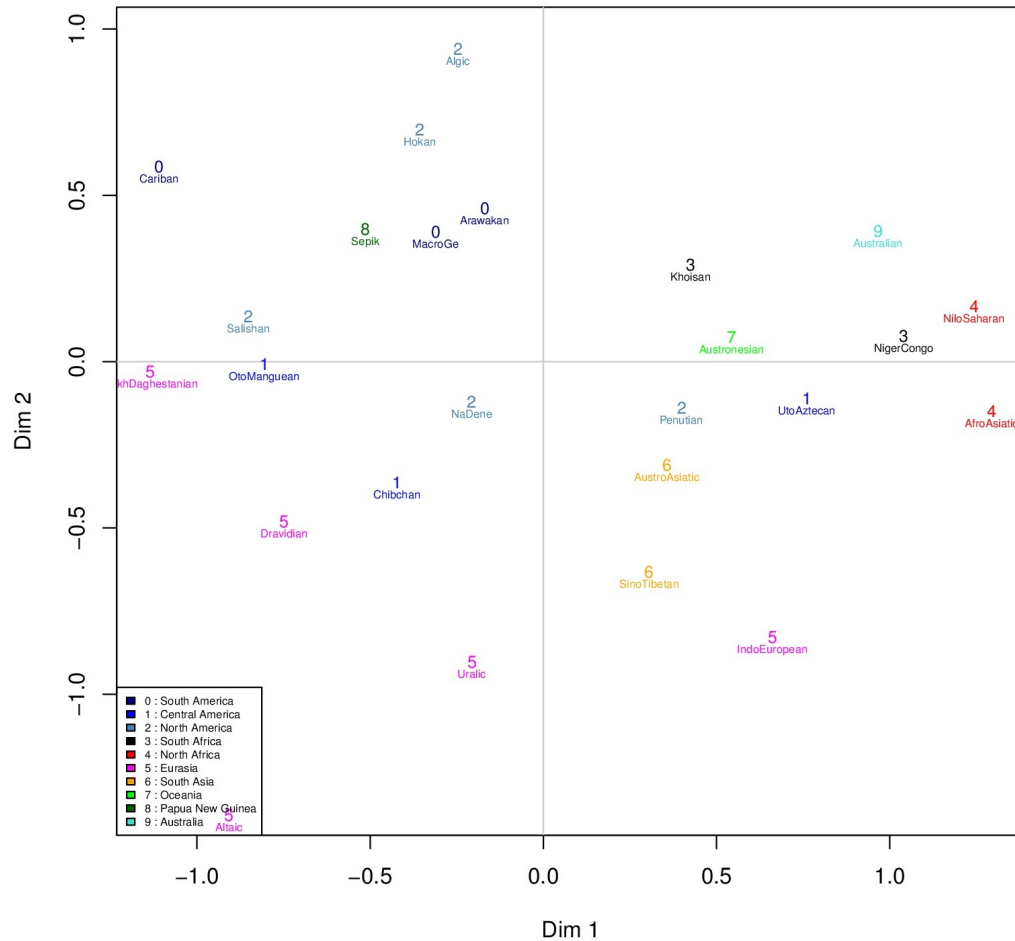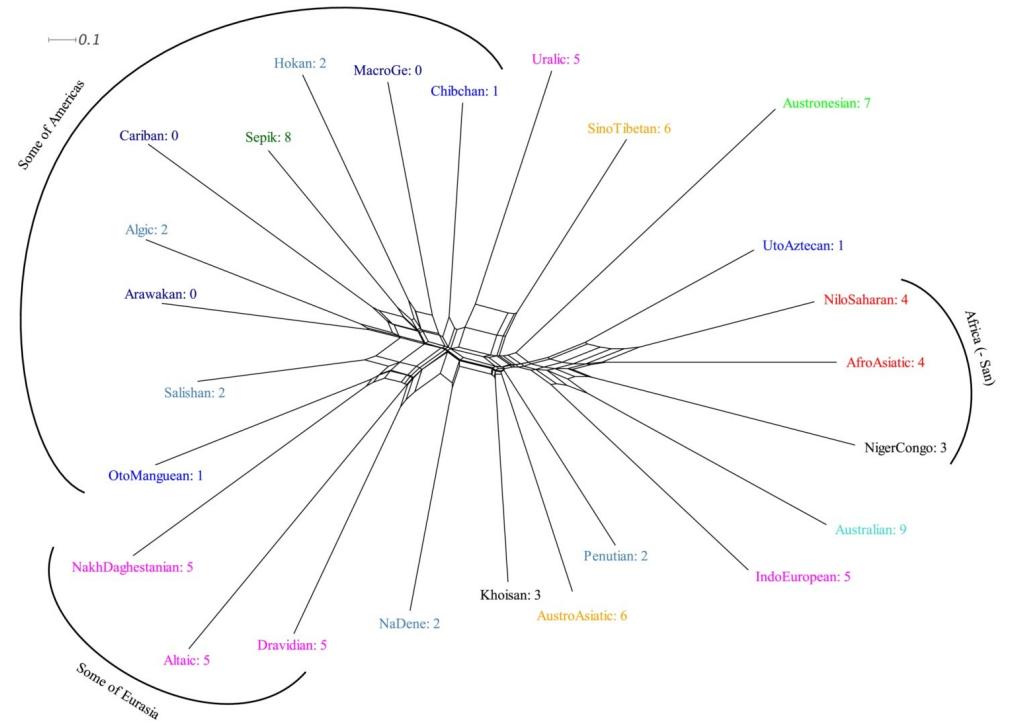

**Figure S13:** MDS (left) and annotated Network (right) representations of the stability distances between language families for dataset **BPW**. Please note that for the MDS plot only the first two dimensions are shown and the scales and directionality of the axes are arbitrary.

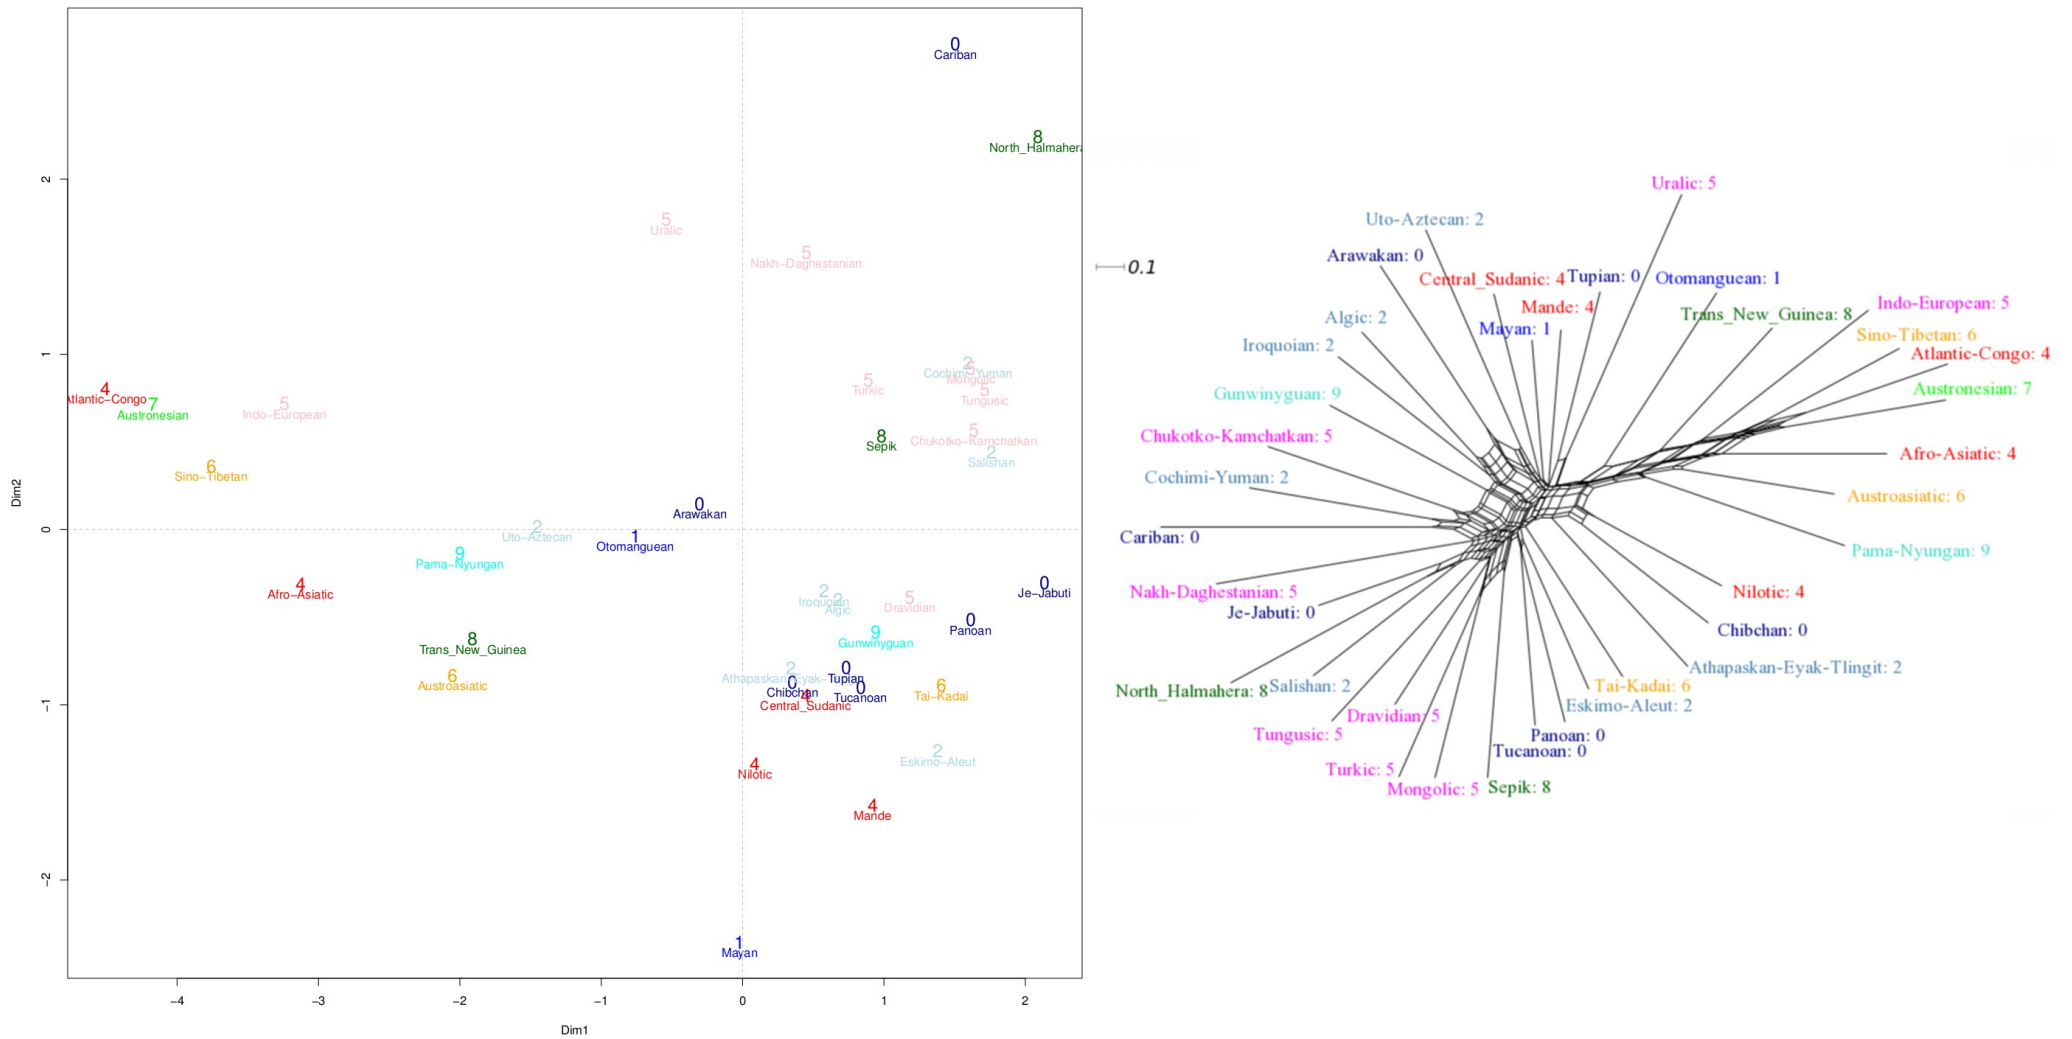

**Figure S14:** MDS (left) and annotated Network (right) representations of the stability distances between language families for dataset **BPH**. Please note that for the MDS plot only the first two dimensions are shown and the scales and directionality of the axes are arbitrary.

| ID | WALS Feature Name                             | Short            | Binary                                                                                           | Poly      | Bin           |
|----|-----------------------------------------------|------------------|--------------------------------------------------------------------------------------------------|-----------|---------------|
| 1  | Consonant Inventories                         | <b>Cons</b>      | <b>Cons1</b> (Average and small vs large), <b>Cons2</b> (Small vs average and large)             | <b>68</b> | <b>70, 75</b> |
| 2  | Vowel Quality Inventories                     | <b>Vowel</b>     | <b>Vowel1</b> (Average and small vs large), <b>Vowel2</b> (Small vs average and large)           | <b>41</b> | <b>45, 16</b> |
| 3  | Consonant-Vowel Ratio                         | <b>CVRatio</b>   | <b>CVRatio1</b> (Average and small vs large), <b>CVRatio2</b> (Small vs average and large)       | <b>67</b> | <b>61, 67</b> |
| 4  | Voicing in Plosives and Fricatives            | <b>VoicPF</b>    | <b>VoicPF1</b> (None vs at least in one), <b>VoicPF2</b> (Both vs at most in one)                | <b>55</b> | <b>52, 28</b> |
| 6  | Uvular Consonants                             | <b>UvulC</b>     | <b>UvulC</b> (None vs at least in one)                                                           | <b>9</b>  | <b>23</b>     |
| 7  | Glottalized Consonants                        | <b>GlottC</b>    | <b>GlottC</b> (None vs at least in one)                                                          | <b>19</b> | <b>21</b>     |
| 8  | Lateral Consonants                            | <b>LatC</b>      | <b>LatC</b> (None vs at least in one)                                                            | <b>44</b> | <b>27</b>     |
| 9  | The Velar Nasal                               | <b>VelarN</b>    | <b>VelarN</b> (No vs yes)                                                                        | <b>38</b> | <b>43</b>     |
| 10 | Vowel Nasalization                            | <b>VowelN</b>    | <b>VowelN</b> (No vs yes)                                                                        | <b>4</b>  | <b>33</b>     |
| 11 | Front Rounded Vowels                          | <b>FrRoundV</b>  | <b>FrRoundV</b> (None vs at least in one)                                                        | <b>2</b>  | <b>8</b>      |
| 12 | Syllable Structure                            | <b>SylStr</b>    | <b>SylStr1</b> (Simple and moderate vs complex), <b>SylStr2</b> (Simple vs moderate and complex) | <b>45</b> | <b>76, 10</b> |
| 13 | Tone                                          | <b>Tone</b>      | <b>Tone1</b> (No tone vs any form of tone), <b>Tone2</b> (Absent and simple vs complex)          | <b>15</b> | <b>37, 9</b>  |
| 14 | Fixed Stress Locations                        | <b>FixStress</b> | <b>FixStress</b> (No vs yes)                                                                     |           | <b>80</b>     |
| 18 | Absence of Common Consonants                  | <b>AbsComC</b>   | <b>AbsComC</b> (No vs any)                                                                       | <b>1</b>  | <b>5</b>      |
| 19 | Presence of Uncommon Consonants               | <b>PresUnC</b>   | <b>PresUnC</b> (None vs at least one)                                                            |           | <b>31</b>     |
| 21 | Exponence of Selected Inflectional Formatives | <b>ESiFIF</b>    | <b>ESiFIF</b> (No case vs case)                                                                  |           | <b>58</b>     |
| 22 | Inflectional Synthesis of the Verb            | <b>IfISVerb</b>  | <b>IfISVerb</b> (0-5 vs 6-13 categories per word)                                                |           | <b>68</b>     |
| 23 | Locus of Marking in the Clause                | <b>LmarkC</b>    | <b>LmarkC</b> (No marking vs marking)                                                            | <b>54</b> | <b>41</b>     |
| 24 | Locus of Marking in Possessive Noun Phrases   | <b>LmarkPNP</b>  | <b>LmarkPNP</b> (No marking vs marking)                                                          | <b>48</b> | <b>22</b>     |
| 27 | Reduplication                                 | <b>Redup</b>     | <b>Redup</b> (No vs any)                                                                         | <b>23</b> |               |
| 28 | Case Syncretism                               | <b>CaseS</b>     | <b>CaseS</b> (No syncretism vs any)                                                              |           | <b>48</b>     |
| 29 | Syncretism in Verbal Person/Number Marking    | <b>SynVPNM</b>   | <b>SynVPNM</b> (No syncretism vs any)                                                            |           | <b>57</b>     |
| 30 | Number of Genders                             | <b>NoGen</b>     | <b>NoGen</b> (None vs any)                                                                       | <b>39</b> | <b>44</b>     |
| 31 | Sex-based and Non-sex-based Gender Systems    | <b>SexGen</b>    | <b>SexGen</b> (Sex-based vs non-sex-based)                                                       |           | <b>30</b>     |
| 32 | Systems of Gender Assignment                  | <b>SgenAss</b>   | <b>SgenAss</b> (Semantic vs semantic and formal)                                                 |           | <b>35</b>     |
| 34 | Occurrence of Nominal Plurality               | <b>OccNPlu</b>   | <b>OccNPlu</b> (None vs any)                                                                     |           | <b>14</b>     |
| 36 | The Associative Plural                        | <b>AssocPlu</b>  | <b>AssocPlu</b> (Same as additive vs unique)                                                     |           | <b>64</b>     |
| 37 | Definite Articles                             | <b>DefArt</b>    | <b>DefArt</b> (No vs any)                                                                        | <b>62</b> | <b>82</b>     |

| <b>ID</b> | <b>WALS Feature Name</b>                                | <b>Short</b>       | <b>Binary</b>                                        | <b>Poly</b> | <b>Bin</b> |
|-----------|---------------------------------------------------------|--------------------|------------------------------------------------------|-------------|------------|
| 38        | Indefinite Articles                                     | <b>IndefArt</b>    | <b>IndefArt</b> (No vs an)                           | <b>60</b>   | <b>83</b>  |
| 41        | Distance Contrasts in Demonstratives                    | <b>DistCDem</b>    | <b>DistCDem</b> (Two way vs more than two)           | <b>49</b>   | <b>84</b>  |
| 42        | Pronominal and Adnominal Demonstratives                 | <b>PadDem</b>      | <b>PadDem</b> (Identical vs different)               | <b>28</b>   |            |
| 43        | Third Person Pronouns and Demonstratives                | <b>P3PrDem</b>     | <b>P3PrDem</b> (Related vs unrelated)                | <b>63</b>   | <b>77</b>  |
| 44        | Gender Distinctions in Independent Personal Pronouns    | <b>GenDIPersP</b>  | <b>GenDIPersP</b> (No distinction vs any)            | <b>35</b>   | <b>47</b>  |
| 45        | Politeness Distinctions in Pronouns                     | <b>PolitDPron</b>  | <b>PolitDPron</b> (No distinction vs any)            | <b>42</b>   | <b>65</b>  |
| 47        | Intensifiers and Reflexive Pronouns                     | <b>IntReflPron</b> | <b>IntReflPron</b> (Identical vs differentiated)     |             | <b>60</b>  |
| 48        | Person Marking on Adpositions                           | <b>PersMAdpos</b>  |                                                      | <b>50</b>   | <b>53</b>  |
| 49        | Number of Cases                                         | <b>Ncases</b>      | <b>Ncases</b> (No case marking vs any)               | <b>65</b>   |            |
| 50        | Asymmetrical Case-Marking                               | <b>AsymCaseM</b>   | <b>AsymCaseM</b> (Symmetrical vs asymmetrical)       | <b>61</b>   | <b>71</b>  |
| 52        | Comitatives and Instrumentals                           | <b>ComInstr</b>    | <b>ComInstr</b> (Identity vs differentiation)        |             | <b>36</b>  |
| 53        | Ordinal Numerals                                        | <b>OrdNum</b>      | <b>OrdNum</b> (None vs any)                          | <b>66</b>   | <b>25</b>  |
| 54        | Distributive Numerals                                   | <b>DistNum</b>     | <b>DistNum</b> (None vs any)                         |             | <b>39</b>  |
| 55        | Numeral Classifiers                                     | <b>NumClas</b>     | <b>NumClas</b> (Absent vs present)                   | <b>13</b>   | <b>42</b>  |
| 56        | Conjunctions and Universal Quantifiers                  | <b>ConjUQu</b>     | <b>ConjUQu</b> (Different vs similar)                |             | <b>54</b>  |
| 57        | Position of Pronominal Possessive Affixes               | <b>PosProPAff</b>  | <b>PosProPAff</b> (None vs any)                      | <b>34</b>   | <b>59</b>  |
| 58        | Obligatory Possessive Inflection                        | <b>OlbPosInfl</b>  | <b>OlbPosInfl</b> (Absent vs present)                | <b>5</b>    | <b>29</b>  |
| 59        | Possessive Classification                               | <b>PosClas</b>     | <b>PosClas</b> (None vs any)                         | <b>29</b>   | <b>56</b>  |
| 63        | Noun Phrase Conjunction                                 | <b>NounPConj</b>   | <b>NounPConj</b> (Different vs identical)            |             | <b>63</b>  |
| 64        | Nominal and Verbal Conjunction                          | <b>NomVConj</b>    | <b>NomVConj</b> (Identity vs differentiation)        | <b>36</b>   | <b>62</b>  |
| 65        | Perfective/Imperfective Aspect                          | <b>PerfImpAsp</b>  | <b>PerfImpAsp</b> (No vs yes)                        | <b>20</b>   | <b>66</b>  |
| 66        | The Past Tense                                          | <b>PastTense</b>   | <b>PastTense</b> (No past tense vs any)              | <b>32</b>   | <b>50</b>  |
| 67        | The Future Tense                                        | <b>FutTense</b>    | <b>FutTense</b> (No vs yes)                          | <b>22</b>   | <b>69</b>  |
| 68        | The Perfect                                             | <b>Perfect</b>     | <b>Perfect</b> (No perfect vs any)                   | <b>43</b>   | <b>73</b>  |
| 70        | The Morphological Imperative                            | <b>MorphImp</b>    | <b>MorphImp</b> (No second-person imperative vs any) | <b>51</b>   | <b>26</b>  |
| 73        | The Optative                                            | <b>Optative</b>    | <b>Optative</b> (Absent vs present)                  | <b>3</b>    | <b>17</b>  |
| 76        | Overlap between Situational and Epistemic Modal Marking | <b>OvSitEpi</b>    | <b>OvSitEpi</b> (No overlap vs overlap)              | <b>47</b>   | <b>78</b>  |

| ID  | WALS Feature Name                                                                             | Short                 | Binary                                                                                                           | Poly | Bin    |
|-----|-----------------------------------------------------------------------------------------------|-----------------------|------------------------------------------------------------------------------------------------------------------|------|--------|
| 77  | Semantic Distinctions of Evidentiality                                                        | <b>SemDistEv</b>      | <b>SemDistEv</b> (No grammatical evidential vs any)                                                              | 46   | 72     |
| 79  | Suppletion According to Tense and Aspect                                                      | <b>SuppTAsp</b>       | <b>SuppTAsp</b> (None vs any)                                                                                    | 25   | 55     |
| 80  | Verbal Number and Suppletion                                                                  | <b>VnumSupp</b>       | <b>VnumSupp</b> (None vs any)                                                                                    | 33   | 32     |
| 82  | Order of Subject and Verb                                                                     | <b>SV</b>             | <b>SV1</b> (No dominant order vs any dominant order), <b>SV2</b> (SV vs VS)                                      | 14   | 12, 15 |
| 83  | Order of Object and Verb                                                                      | <b>OV</b>             | <b>OV1</b> (No dominant order vs any dominant order), <b>OV2</b> (OV vs VO)                                      | 11   | 6, 19  |
| 85  | Order of Adposition and Noun Phrase                                                           | <b>AdposNP</b>        | <b>AdposNP</b> (Postpositions vs prepositions)                                                                   | 16   | 13     |
| 86  | Order of Genitive and Noun                                                                    | <b>GenN</b>           | <b>GenN1</b> (No dominant order vs any dominant order), <b>GenN2</b> (GN vs NG)                                  | 6    | 3, 11  |
| 87  | Order of Adjective and Noun                                                                   | <b>AdjN</b>           | <b>AdjN1</b> (No dominant order vs any dominant order), <b>AdjN2</b> (AdjN vs Nadj)                              | 31   | 4, 38  |
| 89  | Order of Numeral and Noun                                                                     | <b>NumN</b>           | <b>NumN1</b> (No dominant order vs any dominant order), <b>NumN2</b> (NumN vs NNum)                              | 12   | 1, 24  |
| 91  | Order of Degree Word and Adjective                                                            | <b>DegWAdj</b>        | <b>DegWAdj1</b> (No dominant order vs any dominant order), <b>DegWAdj2</b> (DegAdj vs AdjDeg)                    | 30   | 18, 40 |
| 92  | Position of Polar Question Particles                                                          | <b>PolQPart</b>       | <b>PolQPart</b> (No question particle vs any)                                                                    | 64   | 85     |
| 93  | Position of Interrogative Phrases in Content Questions                                        | <b>IntPhCQ</b>        | <b>IntPhCQ1</b> (No dominant order vs any dominant order), <b>IntPhCQ2</b> (Initial vs non-initial)              | 27   | 2, 51  |
| 95  | Relationship between the Order of Object and Verb and the Order of Adposition and Noun Phrase | <b>OVAdpNP</b>        | <b>OVAdpNP</b> (Head first vs head second)                                                                       | 37   | 7      |
| 96  | Relationship between the Order of Object and Verb and the Order of Relative Clause and Noun   | <b>OVRelN</b>         | <b>OVRelN</b> (Head first vs head second)                                                                        | 52   | 20     |
| 97  | Relationship between the Order of Object and Verb and the Order of Adjective and Noun         | <b>OVAdjN</b>         | <b>OVAdjN</b> (Head first vs head second)                                                                        | 58   | 49     |
| 102 | Verbal Person Marking                                                                         | <b>VpersM</b>         | <b>VpersM</b> (No person marking vs any)                                                                         | 53   | 34     |
| 104 | Order of Person Markers on the Verb                                                           | <b>PersMV</b>         | <b>PersMV</b> (A and P do not or do not both occur on the verb vs any)                                           | 59   | 74     |
| 107 | Passive Constructions                                                                         | <b>PassiveC</b>       | <b>PassiveC</b> (Absent vs present)                                                                              | 26   | 79     |
| 108 | Antipassive Constructions                                                                     | <b>AntipassiveC</b>   | <b>AntipassiveC</b> (No antipassive vs any)                                                                      | 18   | 46     |
| 109 | Applicative Constructions                                                                     | <b>ApplicativeC</b>   | <b>ApplicativeC</b> (No applicative vs any)                                                                      | 57   |        |
| 113 | Symmetric and Asymmetric Standard Negation                                                    | <b>SymAsymStNeg</b>   | <b>SymAsymStNeg1</b> (Symmetric vs asymmetric and both), <b>SymAsymStNeg2</b> (Symmetric and both vs asymmetric) | 56   | 81, 86 |
| 118 | Predicative Adjectives                                                                        | <b>PredAdj</b>        | <b>PredAdj1</b> (Verbal encoding vs any), <b>PredAdj2</b> (Nonverbal encoding vs any)                            | 24   |        |
| 119 | Nominal and Locational Predication                                                            | <b>NomLocPred</b>     | <b>NomLocPred</b> (Different vs identical)                                                                       | 8    |        |
| 120 | Zero Copula for Predicate Nominals                                                            | <b>ZeroCopPredNom</b> | <b>ZeroCopPredNom</b> (Possible vs impossible)                                                                   | 21   |        |

| ID                                                                   | WALS Feature Name | Short                                                                                                                                                                                                                                                                                                                                                                                                                                                                                                                                                                                                                                                                                                                                                                                                         | Binary                                                           | Poly      | Bin |
|----------------------------------------------------------------------|-------------------|---------------------------------------------------------------------------------------------------------------------------------------------------------------------------------------------------------------------------------------------------------------------------------------------------------------------------------------------------------------------------------------------------------------------------------------------------------------------------------------------------------------------------------------------------------------------------------------------------------------------------------------------------------------------------------------------------------------------------------------------------------------------------------------------------------------|------------------------------------------------------------------|-----------|-----|
| 126                                                                  | 'When' Clauses    | <b>WhenC</b>                                                                                                                                                                                                                                                                                                                                                                                                                                                                                                                                                                                                                                                                                                                                                                                                  | <b>WhenC1</b> (Balanced vs any), <b>WhenC2</b> (Deranked vs any) | <b>40</b> |     |
| 129                                                                  | Hand and Arm      | <b>HandArm</b>                                                                                                                                                                                                                                                                                                                                                                                                                                                                                                                                                                                                                                                                                                                                                                                                | <b>HandArm</b> (Identical vs different)                          | <b>17</b> |     |
| 136                                                                  | M-T Pronouns      | <b>MTPrn</b>                                                                                                                                                                                                                                                                                                                                                                                                                                                                                                                                                                                                                                                                                                                                                                                                  | <b>MTPrn</b> (No M-T pronouns vs any)                            | <b>10</b> |     |
| 137                                                                  | N-M Pronouns      | <b>NMPrn</b>                                                                                                                                                                                                                                                                                                                                                                                                                                                                                                                                                                                                                                                                                                                                                                                                  | <b>NMPrn</b> (No N-M pronouns vs any)                            | <b>7</b>  |     |
| <b>The features listed from the most stable to the most unstable</b> |                   |                                                                                                                                                                                                                                                                                                                                                                                                                                                                                                                                                                                                                                                                                                                                                                                                               |                                                                  |           |     |
| The <b>polymorphic</b> features: most stable → most unstable         |                   | AbsComC, FrRoundV, Optative, VowelN, OlbPosInfl, GenN, NMPrn, NomLocPred, UvulC, MTPrn, OV, NumN, NumClas, SV, Tone, AdposNP, HandArm, AntipassiveC, GlotC, PerfImpAsp, ZeroCopPredNom, FutTense, Redup, PredAdj, SuppTAsp, PassiveC, IntPhCQ, PadDem, PosClas, DegWAdj, AdjN, PastTense, VnumSupp, PosProPAff, GenDIPersP, NomVConj, OVAdpNP, VelarN, NoGen, WhenC, Vowel, PolitDPrn, Perfect, LatC, SylStr, SemDistEv, OvSitEpi, LmarkPNP, DistCDem, PersMAdpos, MorphImp, OVRelN, VpersM, LmarkC, VoicPF, SymAsymStNeg, ApplicativeC, OVAdjN, PersMV, IndefArt, AsymCaseM, DefArt, P3PrDem, PolQPart, Ncases, OrdNum, CVRatio, Cons                                                                                                                                                                        |                                                                  |           |     |
| The <b>binary</b> features: most stable → most unstable              |                   | NumN1, IntPhCQ1, GenN1, AdjN1, AbsComC, OV1, OVAdpNP, FrRoundV, Tone2, SylStr2, GenN2, SV1, AdposNP, OccNPlu, SV2, Vowel2, Optative, DegWAdj1, OV2, OVRelN, GlotC, LmarkPNP, UvulC, NumN2, OrdNum, MorphImp, LatC, VoicPF2, OlbPosInfl, SexGen, PresUnC, VnumSupp, VowelN, VpersM, SgenAss, ComInstr, Tone1, AdjN2, DistNum, DegWAdj2, LmarkC, NumClas, VelarN, NoGen, Vowel1, AntipassiveC, GenDIPersP, CaseS, OVAdjN, PastTense, IntPhCQ2, VoicPF1, PersMAdpos, ConjUQu, SuppTAsp, PosClas, SynVPNM, ESiflF, PosProPAff, IntReflPrn, CVRatio1, NomVConj, NounPConj, AssocPlu, PolitDPrn, PerfImpAsp, CVRatio2, IflSVerb, FutTense, Cons1, AsymCaseM, SemDistEv, Perfect, PersMV, Cons2, SylStr1, P3PrDem, OvSitEpi, PassiveC, FixStress, SymAsymStNeg1, DefArt, IndefArt, DistCDem, PolQPart, SymAsymStNeg2 |                                                                  |           |     |

**Table S3:** The typological features used here, with their full WALS unique ID and name, the short name used in this paper and the binary aspects (if any). **Poly** and **Bin** show the consensus between the 12 datasets: **Poly** gives the stability rank of the polymorphic feature, if any (between 1 = most stable to 68 = most unstable), and **Bin** gives the stability rank of the binary aspect(s) separated by comma (from 1 = most stable to 86 = most unstable). **Poly** and **Bin** cells are empty for those features not included in the stability estimation (as polymorphic or binary) for various reasons such as data coverage and coding meaningfulness. The last two rows give the lists of polymorphic and binary features ordered from the most stable to most unstable (for easiness of comparison). See [9] and especially Tables **S7**, **S4** and **S10** in there for more details and explanations.

| Family       | Case                                                        | Structure                                                                                                                                                           | Size |
|--------------|-------------------------------------------------------------|---------------------------------------------------------------------------------------------------------------------------------------------------------------------|------|
| Afro-Asiatic | BBE                                                         | ((arz,heb),(amh,tig),(((anc,sur),hau,kna),ngi),ker,(mrt,ttr)),(bej,irk,(hae,som)),tzm)                                                                              | 17   |
|              | BBH                                                         | ((tzm,shi),thv),((gde,ttr,mrt),bdm),(lln,ker),(hau,((kna,pip),(anc,sur)),(ngi,mkf)),(awn,(hae,aar,som),bej,(bds,irk)),cop,((aj,((ary,arz,apc,afb),heb)),(tig,amh))) | 32   |
|              | BBW                                                         | ((amh,arz,heb,tig),(anc,hau,kna,sur,ngi),bej,tzm,irk,ker,(mrt,ttr),(hae,som))                                                                                       | 17   |
|              | BPE                                                         | ((arz,heb),(amh,tig)),(bej,irk,(hae,som)),(tzm,shi),(hau,ker,mrt)                                                                                                   | 13   |
|              | BPH                                                         | ((tzm,shi),thv),((gde,ttr,mrt),(lln,ker),(hau,((kna,pip),(anc,sur)),(ngi,mkf))),((hae,som),bej,(bds,irk)),cop,(((ary,arz,apc,afb,mlt),heb)),(tig,amh)))             | 29   |
|              | BPW                                                         | ((amh,arz,heb,tig),bej,tzm,mdx,(hau,kna,sur,ngi),irk,ker,(mrt,ttr),(hae,som))                                                                                       | 17   |
|              | MBE                                                         | (aiw,((arz,heb),(amh,tig),(((anc,sur),hau,kna),ngi),ker,(mrt,ttr)),(bej,irk,(hae,som)),tzm)                                                                         | 18   |
|              | MBH                                                         | ((tzm,shi),thv),((gde,ttr,mrt),bdm),(lln,ker),(hau,((kna,pip),(anc,sur)),(ngi,mkf)),(awn,(hae,aar,som),bej,(bds,irk)),cop,((aj,((ary,arz,apc,afb),heb)),(tig,amh))) | 32   |
|              | MBW                                                         | ((amh,arz,heb,tig),(anc,hau,kna,sur,ngi),bej,tzm,irk,ker,(mrt,ttr),(hae,som))                                                                                       | 17   |
|              | MPE                                                         | ((aiw,mdx),((arz,heb),(amh,tig)),(bej,irk,(hae,som)),tzm,(((hau,kna,sur),ngi),ker,(mrt,ttr)))                                                                       | 18   |
|              | MPH                                                         | ((tzm,shi),thv),((gde,ttr,mrt),(lln,ker),(hau,((kna,pip),(anc,sur)),(ngi,mkf))),((hae,som),bej,(bds,irk)),cop,(((ary,arz,afb,mlt),heb)),(tig,amh)))                 | 28   |
| MPW          | ((amh,arz,heb,tig),bej,tzm,(hau,ngi),irk,ker,mrt,(hae,som)) | 13                                                                                                                                                                  |      |
| Algic        | BBE                                                         | ((crk,ojg),pqm),yur)                                                                                                                                                | 4    |
|              | BBH                                                         | ((bla,crk,pqm,ojg),wiy,yur)                                                                                                                                         | 6    |
|              | BBW                                                         | ((crk,ojg,pqm),yur)                                                                                                                                                 | 4    |
|              | BPE                                                         | ((crk,pqm),yur)                                                                                                                                                     | 3    |
|              | BPH                                                         | ((bla,crk,pqm,ojg),wiy,yur)                                                                                                                                         | 6    |
|              | BPW                                                         | ((crk,pqm),wiy,yur)                                                                                                                                                 | 4    |
|              | MBE                                                         | ((abe,pqm),(crk,ojg)),yur)                                                                                                                                          | 5    |
|              | MBH                                                         | ((bla,crk,pqm,ojg),wiy,yur)                                                                                                                                         | 6    |
|              | MBW                                                         | ((crk,ojg,pqm),yur)                                                                                                                                                 | 4    |
|              | MPE                                                         | ((abe,pqm),crk),wiy,yur)                                                                                                                                            | 5    |
|              | MPH                                                         | ((bla,crk,pqm,ojg),wiy,yur)                                                                                                                                         | 6    |
| MPW          | ((crk,pqm),yur)                                             | 3                                                                                                                                                                   |      |
| Altaic       | BBE                                                         | ((azb,tur),bak,chv,(tyv,sah)),(dta,khk,mjg),evn)                                                                                                                    | 10   |
|              | BBW                                                         | ((azb,bak,chv,tur,tyv,sah),(dta,khk,mjg),evn)                                                                                                                       | 10   |
|              | BPE                                                         | (bak,chv,tur,(tyv,sah),evn,khk)                                                                                                                                     | 7    |
|              | BPW                                                         | ((azb,bak,chv,tur,tyv,sah),(dta,khk,mjg),(evn,evn))                                                                                                                 | 11   |
|              | MBE                                                         | ((alt,tyv,sah),(azb,tur),bak,chv),(dta,khk,mjg),evn)                                                                                                                | 11   |
|              | MBW                                                         | ((azb,bak,chv,tur,tyv,sah),(dta,khk,mjg),evn)                                                                                                                       | 10   |

| Family                  | Case | Structure                                                                                                                                                                                                                                                     | Size |
|-------------------------|------|---------------------------------------------------------------------------------------------------------------------------------------------------------------------------------------------------------------------------------------------------------------|------|
|                         | MPE  | ((alt,tyv,sah),(azb,tur),bak,chv),(dta,khk,mjg),(eve,eve))                                                                                                                                                                                                    | 12   |
|                         | MPW  | ((chv,tur),evn,khk)                                                                                                                                                                                                                                           | 4    |
| Arawakan                | BBE  | ((apu,cni),(guc,rgr))                                                                                                                                                                                                                                         | 4    |
|                         | BBH  | ((plu,((guc,arw,cab),(rgr,tae,bae,gae,ycn)),(ign,cni,apu),ame))                                                                                                                                                                                               | 13   |
|                         | BBW  | (apu,cni,guc,rgr)                                                                                                                                                                                                                                             | 4    |
|                         | BPE  | (apu,cni)                                                                                                                                                                                                                                                     | 2    |
|                         | BPH  | ((plu,((guc,arw,cab),(rgr,gae)),(ign,cni,apu),ame))                                                                                                                                                                                                           | 10   |
|                         | BPW  | (apu,cni,guc,rgr)                                                                                                                                                                                                                                             | 4    |
|                         | MBE  | ((((aca,rgr),guc),(apu,cni)))                                                                                                                                                                                                                                 | 5    |
|                         | MBH  | ((plu,((guc,arw,cab),(rgr,tae,bae,gae,ycn)),(ign,cni,apu),ame))                                                                                                                                                                                               | 13   |
|                         | MBW  | (apu,cni,guc,rgr)                                                                                                                                                                                                                                             | 4    |
|                         | MPE  | ((((aca,rgr),guc),(apu,cni)))                                                                                                                                                                                                                                 | 5    |
|                         | MPH  | ((plu,((guc,arw,cab),(rgr,gae)),(ign,cni,apu),ame))                                                                                                                                                                                                           | 10   |
| Athapaskan-Eyak-Tlingit | BBH  | (nav,hup,(chp,scs),tli)                                                                                                                                                                                                                                       | 5    |
|                         | BPH  | (nav,hup,(chp,scs),tli)                                                                                                                                                                                                                                       | 5    |
|                         | MBH  | (nav,hup,(chp,scs),tli)                                                                                                                                                                                                                                       | 5    |
|                         | MPH  | (nav,hup,(chp,scs),tli)                                                                                                                                                                                                                                       | 5    |
| Atlantic-Congo          | BBH  | ((dyo,(snf,ndv),(wol,fuv)),(kqs,tem)),((mcu,(nhu,((swh,kng,cgg,lue,nya,ndo,(zul,sna,sot),ewo),(bav,agq))),((pym,bom),((ann,efi),(gkn,ogo))),yor,enn,ibo,amo,gbr),(gry,klu),(ewe,(adj,gaa,(lef,(nko,aka))),(dow,mzm),mdd),(gbp,mfc,zne)),(kfz,(dga,dag),spp))) | 50   |
|                         | BPH  | ((dyo,(snf,ndv),(wol,fuv)),(kqs,tem)),((nhu,((swh,kng,((cgg,lug),lue,ndo,(zul,sna,sot),ewo),bav))),((pym,bom),(ann,ogo),yor,enn,ibo,amo,(gbr,nup)),(gry,klu),(ewe,(gaa,(lef,aka))),(dow,mzm),mdd),(liy,gbp,mfc,zne)),(kfz,(dga,dag),spp)))                    | 46   |
|                         | MBH  | ((dyo,(snf,ndv),(wol,fuv)),(kqs,tem)),((mcu,(nhu,((swh,kng,cgg,lue,nya,ndo,(zul,sna,sot),ewo),(bav,agq))),((pym,bom),((ann,efi),(gkn,ogo))),yor,enn,ibo,amo,gbr),(gry,klu),(ewe,(adj,gaa,(lef,(nko,aka))),(dow,mzm),mdd),(gbp,mfc,zne)),(kfz,(dga,dag),spp))) | 50   |
|                         | MPH  | ((dyo,(snf,ndv),(wol,fuv)),(kqs,tem)),((nhu,((swh,kng,((cgg,lug),lue,ndo,(zul,sna,sot),ewo),bav))),((pym,bom),yor,enn,ibo,amo,(gbr,nup)),gry,(ewe,(gaa,(lef,aka))),(dow,mzm),mdd),(gbp,mfc,zne)),(kfz,(dga,dag),spp)))                                        | 42   |
| Australian              | BBE  | ((aer,dif,dbl,ktg,(vma,pjt),wyb,yii),gni,gbc,mpb,(zmr,mpb,mwf),(mpc,nuy,wrr),tiw,ung,wmb)                                                                                                                                                                     | 21   |
|                         | BBW  | ((aer,dif,dbl,ktg,vma,wyb,pjt,yii),gbc,gni,gyd,mpb,mpc,zmr,mpb,mwf,nuy,tiw,ung,wmb,wrr)                                                                                                                                                                       | 21   |
|                         | BPE  | ((alh,mpc,nuy,wrr),(aer,dif,dbl,ktg,(vma,pjt),wyb,yii),gni,mpb,(zmr,mpb),tiw,ung,wmb)                                                                                                                                                                         | 19   |
|                         | BPW  | (alh,(aer,dif,duj,dbl,ktg,vma,wyb,pjt,yii),gbc,gni,gyd,mpb,mpc,zmr,mpb,mwf,nig,nuy,tiw,ung,wmb,wrr)                                                                                                                                                           | 24   |
|                         | MBE  | ((ard,dif),aer,dbl,gyd,ktg,(vma,pjt),wyb,yii),gni,gbc,mpb,(zmr,mpb,mwf),(mpc,nuy,wrr),tiw,ung,wmb)                                                                                                                                                            | 22   |
|                         | MBW  | ((aer,dif,dbl,ktg,vma,wyb,pjt,yii),gbc,gni,gyd,mpb,mpc,zmr,mpb,mwf,nuy,tiw,ung,wmb,wrr)                                                                                                                                                                       | 21   |



| Family         | Case | Structure                                                                                                                                                                                                                                                                                                                                            | Size |
|----------------|------|------------------------------------------------------------------------------------------------------------------------------------------------------------------------------------------------------------------------------------------------------------------------------------------------------------------------------------------------------|------|
|                | MPE  | ((ard,dif),aer,duj,dbl,gyd,ktg,(vma,pjt),wyb,yii),(alh,mpc,nig,nuy,wrr),gni,gbc,mph,(zmr,mpb,mwf),tiw,ung,wmb)                                                                                                                                                                                                                                       | 25   |
|                | MPW  | ((aer,dif,dbl,vma,wyb,pjt,yii),gni,gyd,mpb,mpc,zmr,mph,nuy,tiw,ung,wmb,wrr)                                                                                                                                                                                                                                                                          | 18   |
| Austro-Asiatic | BBE  | ((khm,(sed,kpm),(kha,kjg),caq,sza,vie))                                                                                                                                                                                                                                                                                                              | 8    |
|                | BBH  | ((sza,((sed,(kpm,crw),brb),khm),mnw,(caq,ncb),kha,kjg,vie),(khr,bfw))                                                                                                                                                                                                                                                                                | 14   |
|                | BBW  | (kha,khm,kjg,unr,caq,(sed,kpm),sza,vie)                                                                                                                                                                                                                                                                                                              | 9    |
|                | BPE  | ((khm,(kha,kjg),sza,vie))                                                                                                                                                                                                                                                                                                                            | 5    |
|                | BPH  | ((tea,sza),((sed,(kpm,crw),brb),khm),(caq,ncb),kha,kjg,vie),bfw)                                                                                                                                                                                                                                                                                     | 13   |
|                | BPW  | ((crw,sed,kpm),kha,khm,kjg,unr,caq,sza,vie)                                                                                                                                                                                                                                                                                                          | 10   |
|                | MBE  | ((bdq,sed,kpm),khm),(kha,kjg),caq,sza,vie)                                                                                                                                                                                                                                                                                                           | 9    |
|                | MBH  | ((sza,((sed,(kpm,crw),brb),khm),mnw,(caq,ncb),kha,kjg,vie),(unr,(khr,bfw)))                                                                                                                                                                                                                                                                          | 15   |
|                | MBW  | (kha,khm,kjg,unr,caq,(sed,kpm),sza,vie)                                                                                                                                                                                                                                                                                                              | 9    |
|                | MPE  | ((bdq,(crw,kpm),sed),khm),(kha,kjg),caq,sza,vie)                                                                                                                                                                                                                                                                                                     | 10   |
|                | MPH  | ((tea,sza),((sed,(kpm,crw),brb),khm),(caq,ncb),kha,kjg,vie),(unr,bfw))                                                                                                                                                                                                                                                                               | 14   |
|                | MPW  | (kha,khm,kjg,unr,sza,vie)                                                                                                                                                                                                                                                                                                                            | 6    |
| Austronesian   | BBE  | (tay,(btx,bbc),cha,((((dhv,iai),(fij,(((haw,mri),rap),smo))))),(gil,pon),pma,kwd,tnl),(khl,kij,tgc),yap),(irh,mky),tet),(iba,ind),plt,pau,tgl,bhq),pwn,dru)                                                                                                                                                                                          | 31   |
|                | BBH  | (tay,((mnb,bhq),(xbr,nni,tet),(los,(((fij,(((haw,(tah,mri),rap),(fut,smo)),(ton,niu))),rtm),(dhv,iai),(gil,kos,((pon,mkj),woe))),cir,pma),(aty,erg,tnl),kwd),((tgc,(hla,ksd),nak),(khl,(xsi,pss),mva),((tbo,gvs),sbe),(meu,kij))),yap),(irh,mky),(mhz,amk))),cha,(plt,ddl),jav,ljp,(((ace,cja),(iba,ind)),sun),((btx,bbc),nia),pau,tgl),pwn,dru,tsu) | 66   |
|                | BBW  | (tay,(btx,bbc,iba,ind),cha,(dhv,fij,haw,iai,khl,kij,gil,kwd,tnl,mri,pma,pon,rap,smo,tgc),(irh,mky),plt,pwn,pau,dru,tgl,tet,bhq,yap)                                                                                                                                                                                                                  | 31   |
|                | BPE  | ((btx,cha,((((dhv,iai),(fij,(((haw,mri),rap))))),gil,pma)),(kij,tgc),yap),mky),ind,plt,tgl,bhq),pwn)                                                                                                                                                                                                                                                 | 19   |
|                | BPH  | (tay,((mnb,bhq),(xbr,tet),(los,(((fij,(((haw,(tah,mri),rap),(fut,smo)),(ton,niu))),rtm),(dhv,iai),(gil,kos,((pon,mkj),woe))),cir,pma),(aty,erg,tnl),(kwd,aia),((tgc,ksd),nak),(jae,khl,mva),((tbo,gvs),(meu,kij))),yap),(irh,mky),(mhz))),cha,(plt,ddl),jav,ljp,(((ace,cja),(iba,ind)),sun),(btx,bbc),pau,(pam,(ceb,tgl),pag)),pwn,dru,tsu)          | 62   |
|                | BPW  | ((ace,btx,bbc,ind,sun),tay,cha,(dhv,fij,haw,iai,khl,kij,gil,kos,kwd,tnl,mri,mkj,pma,pon,rap,smo,tgc,cir),plt,pwn,pau,dru,mky,tgl,tet,bhq,yap)                                                                                                                                                                                                        | 34   |
|                | MBE  | ((ace,(iba,ind),(btx,bbc),cha,((((dhv,iai),(fij,(((haw,mri),rap),smo))))),(gil,pon),pma,kwd,tnl),(khl,kij,tgc),yap),(irh,mky),tet),plt,pau,tgl,bhq),tay,pwn,dru)                                                                                                                                                                                     | 32   |
|                | MBH  | (tay,((mnb,bhq),(xbr,nni,tet),(los,(((fij,(((haw,(tah,mri),rap),(fut,smo)),(ton,niu))),rtm),(dhv,iai),(gil,kos,((pon,mkj),woe))),cir,pma),(aty,erg,tnl),kwd),((tgc,(hla,ksd),nak),(khl,(xsi,pss),mva),((tbo,gvs),sbe),(meu,kij))),yap),(irh,mky),(mhz,amk))),cha,(plt,ddl),jav,ljp,(((ace,cja),(iba,ind)),sun),((btx,bbc),nia),pau,tgl),pwn,dru,tsu) | 66   |
|                | MBW  | (tay,(btx,bbc,iba,ind),cha,(dhv,fij,haw,iai,khl,kij,gil,kwd,tnl,mri,pma,pon,rap,smo,tgc),(irh,mky),plt,pwn,pau,dru,tgl,tet,bhq,yap)                                                                                                                                                                                                                  | 31   |
|                | MPE  | ((ace,ind),sun),(btx,bbc),cha,((((dhv,iai),(fij,(((haw,mri),rap),smo))))),(kos,gil,(mkj,pon)),pma,cir,kwd,tnl),(khl,kij,tgc),yap),mky),tet),plt,pau,tgl,bhq),tay,pwn,dru)                                                                                                                                                                            | 34   |
|                | MPH  | (tay,((mnb,bhq),(xbr,tet),(los,(((fij,(((haw,(tah,mri),rap),(fut,smo)),(ton,niu))),dhv,iai),(gil,kos,((pon,mkj),woe))),cir,pma),(aty,erg,tnl),(kwd,aia),((tgc,ksd),nak),(jae,khl,mva),((tbo,gvs),(meu,kij))),yap),(irh,mky),(mhz))),cha,(plt,ddl),jav,ljp,(((ace,cja),(iba,ind)),sun),(btx,bbc),pau,(pam,(ceb,tgl),pag)),pwn,dru,tsu)                | 61   |
|                | MPW  | ((btx,ind),cha,(dhv,fij,haw,iai,kij,gil,mri,pma,pon,rap,tgc),plt,pwn,mky,tgl,bhq,yap)                                                                                                                                                                                                                                                                | 20   |
| Aymaran        | BBE  | (ayc,jqr)                                                                                                                                                                                                                                                                                                                                            | 2    |

| Family          | Case | Structure                       | Size |
|-----------------|------|---------------------------------|------|
|                 | BBW  | (ayc,jqr)                       | 2    |
|                 | BPE  | (ayc,jqr)                       | 2    |
| Cariban         | BBE  | ((car,mbc),hix)                 | 3    |
|                 | BPE  | (car,hix)                       | 2    |
|                 | MBE  | ((ake,mbc),car),hix)            | 4    |
|                 | MPE  | ((ake,mbc),car),hix)            | 4    |
|                 | BBH  | (apy,car,hix,mbc)               | 4    |
|                 | BBW  | (car,hix,mbc)                   | 3    |
|                 | BPH  | (apy,car,hix,mbc)               | 4    |
|                 | BPW  | (car,hix,mbc)                   | 3    |
|                 | MBH  | (apy,car,hix,mbc)               | 4    |
|                 | MBW  | (car,hix,mbc)                   | 3    |
|                 | MPH  | (apy,car,hix,mbc)               | 4    |
|                 | MPW  | (car,hix,mbc)                   | 3    |
| Central-Sudanic | BBH  | (niy,lgg,(yul,(bmi,(myb,sba)))) | 6    |
|                 | BPH  | (niy,lgg,(yul,(bmi,(myb,sba)))) | 6    |
|                 | MBH  | (niy,lgg,(yul,(bmi,(myb,sba)))) | 6    |
|                 | MPH  | (niy,lgg,(yul,(bmi,(myb,sba)))) | 6    |
| Chibchan        | BBE  | (bzd,arh,rma)                   | 3    |
|                 | BBH  | (pay,(gym,(tfr,bzd),arh,rma))   | 6    |
|                 | BBW  | (bzd,arh,rma)                   | 3    |
|                 | BPE  | (bzd,arh,rma)                   | 3    |
|                 | BPH  | (pay,(gym,(tfr,bzd),arh,rma))   | 6    |
|                 | BPW  | (bzd,arh,rma)                   | 3    |
|                 | MBE  | (sab,bzd,arh,rma)               | 4    |
|                 | MBH  | (pay,(gym,(tfr,bzd),arh,rma))   | 6    |
|                 | MBW  | (bzd,arh,rma)                   | 3    |
|                 | MPE  | (sab,bzd,arh,rma)               | 4    |
|                 | MPH  | (pay,(gym,(tfr,bzd),arh,rma))   | 6    |
| Chukotko-       | BBE  | (ckt,itl)                       | 2    |

| Family        | Case | Structure                                     | Size |
|---------------|------|-----------------------------------------------|------|
| Kamchatkan    | BBH  | ((ckt,kpy),itl)                               | 3    |
|               | BPH  | ((ckt,kpy),itl)                               | 3    |
|               | MBE  | ((alr,ckt),itl)                               | 3    |
|               | MBH  | ((ckt,kpy),itl)                               | 3    |
|               | MPE  | ((alr,ckt),itl)                               | 3    |
|               | MPH  | ((ckt,kpy),itl)                               | 3    |
| Cochimi-Yuman | BBH  | ((coc,dih),mrc)                               | 3    |
|               | BPH  | ((coc,dih),mrc)                               | 3    |
|               | MBH  | ((coc,dih),mrc)                               | 3    |
|               | MPH  | ((coc,dih),mrc)                               | 3    |
| Dravidian     | BBE  | (brh,((kan,tam),tcy),tel)                     | 5    |
|               | BBH  | (kfb,tel,brh,((ggo,kff),(kan,(tam,mal),tcy))) | 9    |
|               | BBW  | (brh,(kan,tam,tcy),tel)                       | 5    |
|               | BPE  | (brh,kan)                                     | 2    |
|               | BPH  | (tel,brh,(kff,(kan,(tam,mal),tcy)))           | 7    |
|               | BPW  | (brh,(kan,tam),tel)                           | 4    |
|               | MBE  | ((((bfq,kan),tam),tcy),brh,tel)               | 6    |
|               | MBH  | (kfb,tel,brh,((ggo,kff),(kan,(tam,mal),tcy))) | 9    |
|               | MBW  | (brh,(kan,tam,tcy),tel)                       | 5    |
|               | MPE  | ((((bfq,kan),tam)),brh,tel)                   | 5    |
|               | MPH  | (tel,brh,(kff,(kan,(tam,mal),tcy)))           | 7    |
| Eskimo-Aleut  | BBH  | (kal,(esu,ess))                               | 3    |
|               | BPE  | (kal,esu)                                     | 2    |
|               | BPH  | (kal,(esu,ess))                               | 3    |
|               | MBH  | (kal,(esu,ess))                               | 3    |
|               | MPE  | (ale,(kal,esu))                               | 3    |
|               | MPH  | (kal,(esu,ess))                               | 3    |
| Gunwinyguan   | BBH  | (gup,nuy,wrz)                                 | 3    |
|               | BPH  | (gup,nuy,nig,wrz)                             | 4    |
|               | MBH  | (gup,nuy,wrz)                                 | 3    |

| Family        | Case                                                                                      | Structure                                                                                                                                                                                                                    | Size |
|---------------|-------------------------------------------------------------------------------------------|------------------------------------------------------------------------------------------------------------------------------------------------------------------------------------------------------------------------------|------|
|               | MPH                                                                                       | (gup,nuy,nig,wrz)                                                                                                                                                                                                            | 4    |
| Hokan         | BBE                                                                                       | ((dih,mrc),(kyh,pom))                                                                                                                                                                                                        | 4    |
|               | BBW                                                                                       | ((dih,mrc),pom)                                                                                                                                                                                                              | 3    |
|               | BPE                                                                                       | ((coc,mrc),(kyh,pom))                                                                                                                                                                                                        | 4    |
|               | BPW                                                                                       | ((dih,mrc),pom)                                                                                                                                                                                                              | 3    |
|               | MBE                                                                                       | ((acv,kyh),pom),(dih,mrc))                                                                                                                                                                                                   | 5    |
|               | MBW                                                                                       | ((dih,mrc),pom)                                                                                                                                                                                                              | 3    |
|               | MPE                                                                                       | ((acv,kyh),pom),(dih,mrc))                                                                                                                                                                                                   | 5    |
| Indo-European | BBE                                                                                       | (aln,hye,(bre,gle),(bul,pol,rus),((((cat,spa),fra)),ita),ron)),((eng,deu),(isl,(nor,swe))),ell,((hin,pan),kas,mar,nep,sin),(kmr,pes),pst),(lav,lit)                                                                          | 29   |
|               | BBH                                                                                       | (aln,hye,(lit,lav),(((bre,cor,cym),(gla,gle))),((nor,dan,swe),isl),(eng,deu,nld)),ell,(guj,pan,lmn,((urd,hin),(ben,mai),nep,kas,sin,mar),(oss,pst),(kmr,pes))),ita,(fra,(cat,(spa,por)),ron)),((rus,ukr),bul,(ces,pol,hrv))) | 44   |
|               | BBW                                                                                       | (aln,hye,(bre,gle),(bul,pol,rus),(cat, fra, ita, ron, spa),(eng,deu,isl,nor,swe),ell,(hin,kas,mar,nep,pan,sin),(kmr,pst,pes),(lav,lit)                                                                                       | 29   |
|               | BPE                                                                                       | (aln,hye,(bre,gle),(bul,pol,rus),(eng,deu),(isl,(nor,swe))),(((fra,spa),ron)),ell,((hin,kas),(pes,pst)),(lav,lit)                                                                                                            | 22   |
|               | BPH                                                                                       | (aln,hye,(lit,lav),(((bre,cym),(gla,gle))),((nor,dan,swe),isl),(eng,deu,nld)),ell,(pan,((urd,hin),(ben,mai),nep,kas,sin,mar),(oss,pst),(kmr,pes))),ita,(fra,(cat,(spa,por)),ron)),((rus,ukr),bul,(ces,pol,hrv)))             | 41   |
|               | BPW                                                                                       | (aln,hye,(bre,gle,cym),(bul,pol,rus),(cat, fra, ita, ron, spa),(nld,eng,deu,isl,nor,swe),ell,(hin,kas,nep,pan,sin),(kmr,pst,pes),(lav,lit)                                                                                   | 30   |
|               | MBE                                                                                       | ((afr,eng,deu),(isl,(nor,swe))),aln,hye,(bre,gle),(bul,pol,rus),((((cat,spa),fra)),ita),ron)),ell,((hin,pan),kas,mar,nep,sin),(kmr,pes),pst),(lav,lit)                                                                       | 30   |
|               | MBH                                                                                       | (aln,hye,(lit,lav),(((bre,cor,cym),(gla,gle))),((nor,dan,swe),isl),(eng,deu,nld)),ell,(guj,pan,lmn,((urd,hin),(ben,mai),nep,kas,sin,mar),(oss,pst),(kmr,pes))),ita,(fra,(cat,(spa,por)),ron)),((rus,ukr),bul,(ces,pol,hrv))) | 44   |
|               | MBW                                                                                       | (aln,hye,(bre,gle),(bul,pol,rus),(cat, fra, ita, ron, spa),(eng,deu,isl,nor,swe),ell,(hin,kas,mar,nep,pan,sin),(kmr,pst,pes),(lav,lit)                                                                                       | 29   |
|               | MPE                                                                                       | ((afr,nld),eng,deu),(isl,(nor,swe))),aln,hye,(((bre,cym),gle)),(bul,pol,rus),((((cat,spa),fra)),ita),ron)),ell,(((hin,pan),kas,nep,sin),(kmr,pes),pst),(lav,lit)                                                             | 31   |
|               | MPH                                                                                       | (aln,hye,(lit,lav),(((bre,cym),(gla,gle))),((nor,dan,swe),isl),(eng,deu,nld)),ell,(pan,((urd,hin),(ben,mai),nep,kas,sin,mar),(oss,pst),(kmr,pes))),ita,(fra,(cat,(spa,por)),ron)),((rus,ukr),bul,(ces,pol,hrv)))             | 41   |
| MPW           | (aln,hye,(bul,pol,rus),(eng,deu,swe),(fra,ron,spa),ell,(hin,kas),gle,(lav,lit),(pst,pes)) | 19                                                                                                                                                                                                                           |      |
| Iroquoian     | BBE                                                                                       | (chr,one)                                                                                                                                                                                                                    | 2    |
|               | BBH                                                                                       | ((see,one),chr)                                                                                                                                                                                                              | 3    |
|               | BPH                                                                                       | ((see,one),chr)                                                                                                                                                                                                              | 3    |
|               | MBH                                                                                       | ((see,one),chr)                                                                                                                                                                                                              | 3    |
|               | MPE                                                                                       | (chr,(one,see))                                                                                                                                                                                                              | 3    |
|               | MPH                                                                                       | ((see,one),chr)                                                                                                                                                                                                              | 3    |
| Je-Jabuti     | BBH                                                                                       | (kgp,(apn,ram))                                                                                                                                                                                                              | 3    |

| Family          | Case | Structure                           | Size |
|-----------------|------|-------------------------------------|------|
|                 | BPH  | (kgp,(apn,ram))                     | 3    |
|                 | MBH  | (kgp,(apn,ram))                     | 3    |
|                 | MPH  | (kgp,(apn,ram))                     | 3    |
| Khoisan         | BBE  | ((hnh,naq),ktz)                     | 3    |
|                 | BBW  | ((hnh,naq),ktz)                     | 3    |
|                 | BPE  | (ktz,naq)                           | 2    |
|                 | BPW  | ((hnh,naq),ktz)                     | 3    |
|                 | MBE  | ((hnh,naq),ktz)                     | 3    |
|                 | MBW  | ((hnh,naq),ktz)                     | 3    |
|                 | MPE  | ((hnh,naq),ktz)                     | 3    |
| Macro-Ge        | BBE  | (bor,(ram,kgp))                     | 3    |
|                 | BPE  | (bor,ram)                           | 2    |
|                 | BPW  | (bor,ram)                           | 2    |
|                 | MBE  | ((apn,ram),kgp),bor)                | 4    |
|                 | MBW  | (bor,(ram,kgp))                     | 3    |
|                 | MPE  | ((apn,ram),bor)                     | 3    |
| Mande           | BBH  | ((daf,mev),(bam,(xpe,men)))         | 5    |
|                 | BPH  | (daf,((((bam,mlq),vai)),(xpe,men))) | 6    |
|                 | MBH  | ((daf,mev),(bam,(xpe,men)))         | 5    |
|                 | MPH  | (daf,(((bam,vai),(xpe,men))))       | 5    |
| Mataco-Guaicuru | BBE  | (axb,mzh)                           | 2    |
|                 | BPE  | (axb,mzh)                           | 2    |
| Mayan           | BBE  | (hsf,jac)                           | 2    |
|                 | BBH  | ((chf,jac,tzj),yua)                 | 4    |
|                 | BPH  | ((jac,tzj),yua)                     | 3    |
|                 | MBE  | (acc,hsf,jac)                       | 3    |
|                 | MBH  | ((chf,jac,tzj),yua)                 | 4    |
|                 | MPE  | ((acc,tzj),mve),hsf,jac)            | 5    |
|                 | MPH  | ((jac,tzj),yua)                     | 3    |
| Mongolic        | BBH  | (dta,mjg,(((bxm,khk),xal)),mhj)     | 6    |

| Family            | Case | Structure                                                                                                                                                    | Size |
|-------------------|------|--------------------------------------------------------------------------------------------------------------------------------------------------------------|------|
|                   | BPH  | (dta,mjg,(((bxm,khk),xal)))                                                                                                                                  | 5    |
|                   | MBH  | (dta,mjg,(((bxm,khk),xal)),mhj)                                                                                                                              | 6    |
|                   | MPH  | (dta,mjg,(((bxm,khk),xal)))                                                                                                                                  | 5    |
| Muskogean         | MPH  | ((cku,akz),cho)                                                                                                                                              | 3    |
| Na-Dene           | BBE  | (hdn,((hup,nav,scs),tli))                                                                                                                                    | 5    |
|                   | BBW  | ((hup,nav,scs),tli)                                                                                                                                          | 4    |
|                   | BPE  | (hdn,((nav,scs),tli))                                                                                                                                        | 4    |
|                   | BPW  | ((hup,nav,scs),tli)                                                                                                                                          | 4    |
|                   | MBE  | ((aht,hup,nav,scs),tli),hdn)                                                                                                                                 | 6    |
|                   | MBW  | ((hup,nav,scs),tli)                                                                                                                                          | 4    |
|                   | MPE  | ((aht,hup,nav,scs),tli),hdn)                                                                                                                                 | 6    |
|                   | MPW  | ((nav,scs),tli)                                                                                                                                              | 3    |
| Nakh-Daghestanian | BBH  | ((ava,huz),lbe,(aqc,(lez,rut))), (bbl,(inh,che))                                                                                                             | 9    |
|                   | BBW  | ((aqc,lez,rut),(ava,huz),(inh,bbl),lbe)                                                                                                                      | 8    |
|                   | BPH  | ((gdo,ava,huz),lbe,(aqc,(lez,rut))), (bbl,(inh,che))                                                                                                         | 10   |
|                   | BPW  | ((aqc,lez),(ava,huz),(inh,bbl),lbe)                                                                                                                          | 7    |
|                   | MBH  | ((ava,huz),lbe,(aqc,(lez,rut))), (bbl,(inh,che))                                                                                                             | 9    |
|                   | MBW  | ((aqc,lez,rut),(ava,huz),(inh,bbl),lbe)                                                                                                                      | 8    |
|                   | MPH  | ((ava,huz),lbe,(aqc,(lez,rut))), (bbl,(inh,che))                                                                                                             | 9    |
|                   | MPW  | (huz,inh,lez)                                                                                                                                                | 3    |
| Niger-Congo       | BBE  | (((aka,ewe),((bom,pym),((ewo,(lue,cgg,swh,zul),nhu)),ibo,yor),((dag,kfz),spp),((dow,mzm),(gbp,zne))),gry),((dyo,ndv,wol),(kqs,tem)),ijc),(bam,daf),mor)      | 29   |
|                   | BBW  | ((aka,ewe),bam,(bom,pym),(dag,kfz,spp),daf,(dyo,ndv,wol),(dow,gbp,mzm,sag,zne),(ewo,lue,cgg,nhu,swh,zul),gry,ibo,ijc,(kqs,tem),mor,yor)                      | 30   |
|                   | BPE  | (((aka,ewe),gry,(ibo,(lue,cgg,swh,zul),yor),(kfz,spp)),(dyo,wol),ijc),bam)                                                                                   | 15   |
|                   | BPW  | ((aka,ewe),bam,bom,(dag,kfz,spp),(dyo,fuv,wol),(dow,gbp,mzm,sag,zne),(ewo,lue,cgg,swh,zul),gry,ibo,ijc,(kqs,tem),mor,yor)                                    | 27   |
|                   | MBE  | (((abi,aka),ewe),((bom,pym),((ewo,(lue,cgg,swh,zul),nhu)),ibo,yor),((dag,kfz),spp),((dow,mzm),(gbp,zne))),gry),((dyo,ndv,wol),(kqs,tem)),ijc),(bam,daf),mor) | 30   |
|                   | MBW  | ((aka,ewe),bam,(bom,pym),(dag,kfz,spp),daf,(dyo,ndv,wol),(dow,gbp,mzm,sag,zne),(ewo,lue,cgg,nhu,swh,zul),gry,ibo,ijc,(kqs,tem),mor,yor)                      | 30   |
|                   | MPE  | (((abi,aka),ewe),((bom,(ewo,(lue,cgg,swh,zul)),ibo,yor),((dag,kfz),spp),((dow,mzm),(gbp,zne))),gry),(dyo,(fuv,wol),(kqs,tem)),ijc),bam,mor)                  | 27   |
|                   | MPW  | ((aka,ewe),bam,(dyo,wol),(gbp,sag),gry,ibo,ijc,(kfz,spp),(lue,cgg,swh,zul),yor)                                                                              | 17   |
| Nilo-Saharan      | BBE  | (bmi,(lgg,niy),wti,((dip,(((laj,luo),mde)),mas,niq),ikx,(mur,nrb,kzh)),fvr,(khq,ses),kun,knc,kgo)                                                            | 20   |
|                   | BBW  | (bmi,wti,(dip,laj,luo,mas,niq),fvr,ikx,knc,(khq,ses),kun,lgg,mde,mur,nrb,niy,kzh)                                                                            | 19   |

| Family          | Case | Structure                                                                                                     | Size |
|-----------------|------|---------------------------------------------------------------------------------------------------------------|------|
|                 | BPE  | (bmi,(lgg,niy),fvr,(khq,ses),kun,knc,kgo,((((laj,luo),mde)),niq),(mur,kzh)))                                  | 15   |
|                 | BPW  | (bmi,(dip,laj,luo,mas,niq,tuv),fvr,ikx,knc,(khq,ses),kun,lgg,mde,mur,nrb,niy,kzh)                             | 19   |
|                 | MBE  | ((((((((ach,laj),luo)),mde),dip),mas,niq),ikx,(mur,nrb,kzh)),(bmi,(lgg,niy)),wti,fvr,(khq,ses),kun,knc,kgo)   | 21   |
|                 | MBW  | (bmi,wti,(dip,laj,luo,mas,niq),fvr,ikx,knc,(khq,ses),kun,lgg,mde,mur,nrb,niy,kzh)                             | 19   |
|                 | MPE  | ((((((((ach,laj),luo)),mde),dip),(mas,tuv),niq),ikx,(mur,nrb,kzh)),(bmi,(lgg,niy)),fvr,(khq,ses),kun,knc,kgo) | 21   |
|                 | MPW  | (bmi,fvr,knc,(khq,ses),kun,(laj,luo,mas,niq),lgg,mde,mur,niy,kzh)                                             | 15   |
| Nilotic         | BBH  | (bfa,(mas,tuv),(kpz,niq),(dip,(lkr,(luo,laj))))                                                               | 9    |
|                 | BPH  | (bfa,(mas,tuv),(kpz,niq),(dip,(lkr,(luo,laj))))                                                               | 9    |
|                 | MBH  | (bfa,(mas,tuv),(kpz,niq),(dip,(lkr,(luo,laj))))                                                               | 9    |
|                 | MPH  | (bfa,(mas,tuv),(kpz,niq),(dip,(lkr,(luo,laj))))                                                               | 9    |
| North Caucasian | BBE  | ((abk,kbd),(aqc,(lez,rut),ava,huz,(inh,bbl),lbe))                                                             | 10   |
|                 | BPE  | (abk,(ava,huz,inh,lbe,lez))                                                                                   | 6    |
|                 | MBE  | ((abk,kbd),(aqc,(lez,rut),ava,huz,(inh,bbl),lbe))                                                             | 10   |
|                 | MPE  | ((abk,kbd),(aqc,lez),ava,huz,(inh,bbl),lbe))                                                                  | 9    |
| North Halmahera | BBH  | ((saj,tvo),mqs)                                                                                               | 3    |
|                 | BPH  | ((saj,tvo),mqs)                                                                                               | 3    |
|                 | MBH  | ((saj,tvo),mqs)                                                                                               | 3    |
|                 | MPH  | ((saj,tvo),mqs)                                                                                               | 3    |
| Oto-Manguean    | BBE  | ((chq,cle),ctp,mig,ote)                                                                                       | 5    |
|                 | BBH  | (((((mig,mil),trc)),(maq,(ctp,zai))),((cpa,cle,(chq,cco),ote),tpx))                                           | 12   |
|                 | BBW  | (ctp,(cle,chq),mig,ote)                                                                                       | 5    |
|                 | BPE  | (cle,mig,ote)                                                                                                 | 3    |
|                 | BPH  | (((((mig,mil),trc)),(maq,(ctp,zai))),((cle,(chq,cco),ote),tpx))                                               | 11   |
|                 | BPW  | (ctp,cle,mig,ote)                                                                                             | 4    |
|                 | MBE  | (amu,(chq,cle),ctp,mig,ote)                                                                                   | 6    |
|                 | MBH  | (((((mig,mil),trc)),(maq,(ctp,zai))),((cpa,cle,(chq,cco),ote),tpx))                                           | 12   |
|                 | MBW  | (ctp,(cle,chq),mig,ote)                                                                                       | 5    |
|                 | MPE  | (amu,cle,ctp,mig,ote)                                                                                         | 5    |
|                 | MPH  | (((((mig,mil),trc)),(maq,(ctp,zai))),((cle,(chq,cco),ote),tpx))                                               | 11   |
|                 | MPW  | (cle,mig,ote)                                                                                                 | 3    |

| Family       | Case | Structure                                                     | Size |
|--------------|------|---------------------------------------------------------------|------|
| Pama-Nyungan | BBH  | ((aly,aer),dbl,ktg,kky,dif,wim,(vma,pjt),jao,wyb,gvn,yii,duj) | 14   |
|              | BPH  | ((aly,aer),dbl,ktg,kgs,kky,dif,wim,(vma,pjt),wyb,gvn,yii,duj) | 14   |
|              | MBH  | ((aly,aer),dbl,ktg,kky,dif,wim,(vma,pjt),jao,wyb,gvn,yii,duj) | 14   |
|              | MPH  | ((aly,aer),dbl,ktg,kky,dif,wim,(vma,pjt),wyb,gvn,yii,duj)     | 13   |
| Panoan       | BBH  | (cao,shp,amc)                                                 | 3    |
|              | BPH  | (cao,shp,amc)                                                 | 3    |
|              | MBH  | (cao,shp,amc)                                                 | 3    |
|              | MPH  | (cao,shp,amc)                                                 | 3    |
| Penutian     | BBE  | (csz,(kla,nez),nmu,skd,tsi,wit)                               | 7    |
|              | BBW  | (kla,nmu,skd,nez,tsi,wit)                                     | 6    |
|              | BPE  | (csz,nmu,skd,nez,tsi,wit)                                     | 6    |
|              | BPW  | (kla,nmu,skd,nez,tsi,wit)                                     | 6    |
|              | MBE  | ((aes,csz),(kla,nez),nmu,skd,tsi,wit)                         | 8    |
|              | MBW  | (kla,nmu,skd,nez,tsi,wit)                                     | 6    |
|              | MPE  | ((aes,csz),(kla,nez),nmu,skd,tsi,wit)                         | 8    |
|              | MPW  | (nmu,skd,nez,tsi,wit)                                         | 5    |
| Salishan     | BBE  | (blc,shs,squ)                                                 | 3    |
|              | BBH  | (blc,(hur,squ),shs,cjh)                                       | 5    |
|              | BPH  | (blc,(hur,squ),shs)                                           | 4    |
|              | BPW  | (shs,squ)                                                     | 2    |
|              | MBE  | (blc,shs,squ)                                                 | 3    |
|              | MBH  | (blc,(hur,squ),shs,cjh)                                       | 5    |
|              | MBW  | (blc,shs,squ)                                                 | 3    |
|              | MPE  | (blc,shs,squ)                                                 | 3    |
|              | MPH  | (blc,(hur,squ),shs)                                           | 4    |
| Sepik        | BBE  | (amp,kmn,kmo)                                                 | 3    |
|              | BBH  | (kmo,kmn,amp,yss)                                             | 4    |
|              | BPH  | (kmo,kmn,amp,yss)                                             | 4    |
|              | BPW  | (amp,kmn)                                                     | 2    |
|              | MBE  | (aau,amp,kmn,kmo)                                             | 4    |



| Family           | Case | Structure                                                                                                                                                                             | Size |
|------------------|------|---------------------------------------------------------------------------------------------------------------------------------------------------------------------------------------|------|
|                  | MBH  | (kmo,kmn,amp,yss)                                                                                                                                                                     | 4    |
|                  | MBW  | (amp,kmn,kmo)                                                                                                                                                                         | 3    |
|                  | MPE  | (aau,amp,kmn)                                                                                                                                                                         | 3    |
|                  | MPH  | (kmo,kmn,amp,yss)                                                                                                                                                                     | 4    |
| Sino-Tibetan     | BBE  | ((njo,(bgr,ctd),(brx,grt),kac),mya,(ksw,eky),(((lbj,taj),lep),(lif,new)),lhu,mni,dap),(yue,cmn))                                                                                      | 19   |
|                  | BBH  | (cmn,(hak,yue),(bca,(lhu,mya),nbf),(((cdm,kgj),(byw,lif,dus),new),lep,((taj,ggn),bee)),(sip,(bod,lbj)),(kac,(brx,grt)),(ksw,(eky,bwe)),(((cnh,bgr),lus),ctd),(njo,nsm,mni)),raw,dap)) | 35   |
|                  | BBW  | ((njo,bgr,ctd,mni),(brx,grt),(mya,lhu),(yue,cmn),kac,(ksw,eky),(lbj,lif,new,taj),lep,dap)                                                                                             | 19   |
|                  | BPE  | (bgr,mya,grt,eky,(((lbj,bod),lep)),lhu,mni),(yue,cmn))                                                                                                                                | 11   |
|                  | BPH  | (cmn,(hak,yue),(bca,(lhu,mya),(((cdm,kgj),(lif,dus),new),lep,(taj,bee)),(bod,lbj),(kac,(brx,grt)),(ksw,eky),(mrh,((cnh,bgr),lus),ctd),(njo,nsm,mni)),raw,dap))                        | 31   |
|                  | BPW  | ((njo,bgr,mni),(brx,grt),(mya,lhu),(yue,cmn),eky,(lbj,lif),lep)                                                                                                                       | 13   |
|                  | MBE  | ((acn,mya),(njo,(bgr,ctd)),(brx,grt),kac),(ksw,eky),(((lbj,taj),lep),(lif,new)),lhu,mni,dap),(yue,cmn))                                                                               | 20   |
|                  | MBH  | (cmn,(hak,yue),(bca,(lhu,mya),nbf),(((cdm,kgj),(byw,lif,dus),new),lep,((taj,ggn),bee)),(sip,(bod,lbj)),(kac,(brx,grt)),(ksw,(eky,bwe)),(((cnh,bgr),lus),ctd),(njo,nsm,mni)),raw,dap)) | 35   |
|                  | MBW  | ((njo,bgr,ctd,mni),(brx,grt),(mya,lhu),(yue,cmn),kac,(ksw,eky),(lbj,lif,new,taj),lep,dap)                                                                                             | 19   |
|                  | MPE  | ((acn,mya),(njo,bgr),(brx,grt),eky,((lbj,lep),lif),lhu,mni),(yue,cmn))                                                                                                                | 14   |
|                  | MPH  | (cmn,(hak,yue),(bca,(lhu,mya),(kgj,(lif,dus),new),lep,(taj,bee)),(bod,lbj),(kac,(brx,grt)),(ksw,eky),(((cnh,bgr),lus),ctd),(njo,mni)),raw,dap))                                       | 28   |
|                  | MPW  | ((bgr,mni),(mya,lhu),(yue,cmn),grt,eky,lbj,lep)                                                                                                                                       | 10   |
| Tacanan          | BBE  | (aro,tna)                                                                                                                                                                             | 2    |
| Tai-Kadai        | BBE  | (nut,tha)                                                                                                                                                                             | 2    |
|                  | BBH  | ((pcc,nut,(lao,tha,shn),doc))                                                                                                                                                         | 6    |
|                  | BPH  | ((pcc,nut,(lao,tha),doc))                                                                                                                                                             | 5    |
|                  | MBE  | (doc,(nut,tha))                                                                                                                                                                       | 3    |
|                  | MBH  | ((pcc,nut,(lao,tha,shn),doc))                                                                                                                                                         | 6    |
|                  | MPE  | (doc,(nut,tha))                                                                                                                                                                       | 3    |
|                  | MPH  | ((nut,(lao,tha),doc))                                                                                                                                                                 | 4    |
| Trans-New Guinea | BBE  | ((aey,wnu),kpw,tya),tml,(dgz,yrb),(dni,ekg),hmt,kew,kiw,mrz,sue,mtg,wgi,ygr)                                                                                                          | 17   |
|                  | BBW  | ((aey,kpw,tya,wnu),tml,dni,ekg,hmt,kew,sue,mtg,wgi,ygr)                                                                                                                               | 13   |
|                  | BPE  | ((aey,wnu),kpw),tml,dgz,(dni,ekg),hmt,kew,mrz,sue,mtg)                                                                                                                                | 12   |
|                  | MBE  | ((agd,ygr),((aey,wnu),kpw,tya),tml,(dgz,yrb),(dni,ekg),hmt,kew,kiw,mrz,sue,mtg,wgi)                                                                                                   | 18   |
|                  | MPE  | ((agd,ygr),((aey,wnu),kpw,tya,wsk),tml,dgz,(dni,ekg),hmt,kew,mrz,sue,mtg)                                                                                                             | 16   |

| Family   | Case | Structure                                                                                       | Size |
|----------|------|-------------------------------------------------------------------------------------------------|------|
|          | MPW  | ((aey,kpw,tya,wnu),tml,dni,hmt,kew,sue,mtg,ygr)                                                 | 11   |
|          | BBH  | (sue,(tya,(wsk,wnu),(aey,ssd)),(tml,((wms,tyn),((sll,wgi),gaj,kew,ygr,kpw),spl,(dni,ekg))),mtg) | 19   |
|          | BPH  | (sue,(tya,(wsk,wnu),(aey,ssd)),(tml,((wms,tyn),((sll,wgi),gaj,kew,ygr,kpw),spl,(dni,ekg))),mtg) | 19   |
|          | MBH  | (sue,(tya,(wsk,wnu),(aey,ssd)),(tml,((wms,tyn),((sll,wgi),gaj,kew,ygr,kpw),spl,(dni,ekg))),mtg) | 19   |
|          | MPH  | (sue,(tya,(wsk,wnu),(aey,ssd)),(tml,((wms,tyn),((sll,wgi),gaj,kew,ygr,kpw),spl,(dni,ekg))),mtg) | 19   |
| Tucanoan | BBE  | (bsn,cub)                                                                                       | 2    |
|          | BBH  | ((cub,tnc),bsn,snn)                                                                             | 4    |
|          | BBW  | (bsn,cub)                                                                                       | 2    |
|          | BPH  | ((cub,tnc),(tuo,bsn),snn)                                                                       | 5    |
|          | MBE  | ((bao,bsn),cub)                                                                                 | 3    |
|          | MBH  | ((cub,tnc),bsn,snn)                                                                             | 4    |
|          | MPE  | ((bao,bsn),cub,tnc)                                                                             | 4    |
|          | MPH  | ((cub,tnc),(tuo,bsn),snn)                                                                       | 5    |
| Tungusic | BBH  | (eve,evn,(gld,ude),mnc)                                                                         | 5    |
|          | BPH  | (eve,evn,(gld,ude),mnc)                                                                         | 5    |
|          | MBH  | (eve,evn,(gld,ude),mnc)                                                                         | 5    |
|          | MPH  | (eve,evn,(gld,ude),mnc)                                                                         | 5    |
| Tupian   | BBE  | (gug,srq,urb)                                                                                   | 3    |
|          | BPE  | (gug,urb)                                                                                       | 2    |
|          | MBE  | ((guq,gug),srq,urb)                                                                             | 4    |
|          | MPE  | ((guq,gug),srq,urb)                                                                             | 4    |
|          | BBH  | (gug,srq,cod,kay,urb)                                                                           | 5    |
|          | BBW  | (gug,srq,urb)                                                                                   | 3    |
|          | BPH  | (gug,srq,cod,urb)                                                                               | 4    |
|          | MBH  | (gug,srq,cod,kay,urb)                                                                           | 5    |
|          | MPH  | (gug,srq,urb)                                                                                   | 3    |
| Turkic   | BBH  | (chv,(((tur,azb,(krc,(tat,bak),(kaa,kir)),uzn)),sah,tyv))                                       | 11   |
|          | BPH  | (chv,(((tur,azb,((tat,bak),kir),uzn)),sah,tyv))                                                 | 9    |
|          | MBH  | (chv,(((tur,azb,(krc,(tat,bak),(kaa,kir)),uzn)),sah,tyv))                                       | 11   |
|          | MPH  | (chv,(((tur,azb,((tat,bak),kir),uzn)),sah,tyv))                                                 | 9    |

| Family      | Case                        | Structure                                                                       | Size |
|-------------|-----------------------------|---------------------------------------------------------------------------------|------|
| Uralic      | BBE                         | (fin,hun,kca,kpv,(yrk,sel))                                                     | 6    |
|             | BBH                         | ((est,fin),hun,kca,mns,mhr,(udm,kpv),sme,(yrk,sel,nio))                         | 12   |
|             | BBW                         | ((fin,kpv),(hun,kca),(yrk,sel))                                                 | 6    |
|             | BPE                         | (fin,hun,kca,yrk)                                                               | 4    |
|             | BPH                         | ((est,fin),hun,kca,mns,mhr,kpv,sme,(yrk,sel,nio))                               | 11   |
|             | BPW                         | (fin,(hun,kca),yrk)                                                             | 4    |
|             | MBE                         | ((enf,yrk,sel),fin,hun,kca,kpv)                                                 | 7    |
|             | MBH                         | ((est,fin),hun,kca,mns,mhr,(udm,kpv),sme,(yrk,sel,nio))                         | 12   |
|             | MBW                         | ((fin,kpv),(hun,kca),(yrk,sel))                                                 | 6    |
|             | MPE                         | ((enf,yrk),fin,hun,kca)                                                         | 5    |
|             | MPH                         | ((est,fin),hun,kca,mns,mhr,kpv,sme,(yrk,sel,nio))                               | 11   |
| MPW         | (fin,hun,yrk)               | 3                                                                               |      |
| Uto-Aztecan | BBE                         | ((chl,com,hop),(nhg,ppl),(ood,yaq))                                             | 7    |
|             | BBH                         | ((hop,((par,com),xaw,pao),(chl,lui)),(crn,(ppl,(nhg,ncj))),(ntp,ood,yaq))       | 14   |
|             | BBW                         | (chl,com,hop,(nhg,ppl),ood,yaq)                                                 | 7    |
|             | BPE                         | ((chl,com),(nhg,ppl),(ood,yaq))                                                 | 6    |
|             | BPH                         | ((hop,((par,com),(xaw,ute),pao),(chl,lui)),(crn,(ppl,(nhg,ncj))),(ntp,ood,yaq)) | 15   |
|             | BPW                         | ((chl,lui),(com,par),hop,(nhg,ppl),ood,yaq)                                     | 9    |
|             | MBE                         | ((chl,com,hop),(nhg,ppl),(ood,yaq))                                             | 7    |
|             | MBH                         | ((hop,((par,com),xaw,pao),(chl,lui)),(crn,(ppl,(nhg,ncj))),(ntp,ood,yaq))       | 14   |
|             | MBW                         | (chl,com,hop,(nhg,ppl),ood,yaq)                                                 | 7    |
|             | MPE                         | ((chl,lui),(com,par),hop),(nhg,ppl),(ood,yaq))                                  | 9    |
|             | MPH                         | ((hop,((par,com),(xaw,ute),pao),(chl,lui)),(crn,(ppl,(nhg,ncj))),(ntp,ood,yaq)) | 15   |
| MPW         | (chl,com,(nhg,ppl),ood,yaq) | 6                                                                               |      |
| Wakashan    | BBE                         | (kwk,myh)                                                                       | 2    |
|             | MBE                         | ((hei,kwk),myh)                                                                 | 3    |
|             | MPE                         | ((hei,kwk),(myh,noo))                                                           | 4    |
| West Papuan | BBE                         | (tvo,mqs)                                                                       | 2    |
|             | MBE                         | (gbi,tvo,mqs)                                                                   | 3    |
| Yanomam     | BBE                         | (shb,xsu)                                                                       | 2    |

| Family   | Case | Structure | Size |
|----------|------|-----------|------|
| Yukaghir | BBE  | (yux,ykg) | 2    |

**Table S4:** The composition and structure of the language families can vary among cases. The structure is given as the topology of the language family in the parentheses notation (Newick format; <http://evolution.genetics.washington.edu/phylip/newicktree.html>). The languages are given using their ISO 639-2 three-letter codes. The number of families and their composition might differ slightly among outgroups for MrBayes.

| Case       | Using Pearson's $r$ |                   | Using Spearman's $\rho$ |                      |
|------------|---------------------|-------------------|-------------------------|----------------------|
|            | $r$                 | $p$               | $\rho$                  | $p$                  |
| <b>MBE</b> | 0.21                | 0.0017            | 0.24                    | $< 10^{-4}$          |
| <b>MBW</b> | 0.30                | $< 10^{-4}$       | 0.32                    | $3 \cdot 10^{-4}$    |
| <b>MBH</b> | 0.19                | 0.001             | 0.22                    | $9.99 \cdot 10^{-5}$ |
| <b>MPE</b> | 0.20                | 0.0031            | 0.22                    | 0.0012               |
| <b>MPW</b> | 0.08                | 0.19              | 0.10                    | 0.13                 |
| <b>MPH</b> | 0.19                | 0.0008            | 0.19                    | 0.0002               |
| <b>BBE</b> | 0.32                | $< 10^{-4}$       | 0.30                    | $< 10^{-4}$          |
| <b>BBW</b> | 0.30                | $2 \cdot 10^{-4}$ | 0.31                    | $< 10^{-4}$          |
| <b>BBH</b> | 0.07                | 0.14              | 0.07                    | 0.12                 |
| <b>BPE</b> | 0.30                | $4 \cdot 10^{-4}$ | 0.23                    | 0.0011               |
| <b>BPW</b> | 0.14                | 0.046             | 0.16                    | 0.022                |
| <b>BPH</b> | 0.04                | 0.22              | 0.05                    | 0.20                 |

**Table S5:** The Mantel correlation (Pearson's  $r$  and Spearman's  $\rho$ ) between stability and geographical distances (10,000 permutations).

| Feature              | Involvement |
|----------------------|-------------|
| <b>Tone2</b>         | <b>0.99</b> |
| <b>PolQPart</b>      | <b>0.99</b> |
| <b>AssocPlu</b>      | <b>0.99</b> |
| <b>SymAsymStNeg2</b> | <b>0.98</b> |
| <b>OccNPlu</b>       | <b>0.98</b> |
| <b>SV2</b>           | <b>0.98</b> |
| <b>AbsComC</b>       | <b>0.98</b> |
| <b>OrdNum</b>        | <b>0.98</b> |
| <b>Perfect</b>       | <b>0.98</b> |
| <b>LatC</b>          | <b>0.98</b> |
| <b>OV2</b>           | <b>0.98</b> |
| <b>GenDIPersP</b>    | <b>0.98</b> |
| <b>NumN2</b>         | <b>0.98</b> |
| <b>Cons1</b>         | <b>0.98</b> |
| <b>IntReflPron</b>   | <b>0.97</b> |
| <b>IndefArt</b>      | <b>0.97</b> |
| SylStr1              | 0.79        |
| PastTense            | 0.79        |
| OlbPosInfl           | 0.79        |
| VpersM               | 0.79        |
| SuppTAsp             | 0.79        |
| AdjN1                | 0.79        |
| Cons2                | 0.79        |
| SexGen               | 0.78        |
| ComInstr             | 0.22        |
| LmarkPNP             | 0.21        |

**Table S6:** Most involved features for dataset **MBE** (showing only those with involvement  $> 0.03$ ). The PC1 of the 5 runs explains **92.22%** of variance and the maximum Mantel correlation is **0.51**.

| Feature            | Involvement |
|--------------------|-------------|
| <b>IndefArt</b>    | <b>0.99</b> |
| <b>AssocPlu</b>    | <b>0.99</b> |
| <b>OrdNum</b>      | <b>0.98</b> |
| <b>IntReflPron</b> | <b>0.98</b> |
| <b>NomVConj</b>    | <b>0.98</b> |
| <b>AbsComC</b>     | <b>0.98</b> |
| <b>OlbPosInfl</b>  | <b>0.98</b> |
| <b>Cons1</b>       | <b>0.98</b> |
| <b>LatC</b>        | <b>0.98</b> |
| <b>VpersM</b>      | <b>0.98</b> |
| <b>P3PrDem</b>     | <b>0.98</b> |
| <b>OVA dpNP</b>    | <b>0.98</b> |
| <b>Tone2</b>       | <b>0.97</b> |
| <b>Perfect</b>     | <b>0.97</b> |
| OccNPlu            | 0.79        |
| PastTense          | 0.79        |
| SV2                | 0.79        |
| PerfImpAsp         | 0.79        |
| SynVPNM            | 0.78        |
| OvSitEpi           | 0.77        |
| LmarkC             | 0.60        |
| FixStress          | 0.59        |
| SylStr1            | 0.41        |
| MorphImp           | 0.41        |
| LmarkPNP           | 0.41        |
| PolQPart           | 0.41        |
| IntPhCQ2           | 0.40        |
| GlottC             | 0.40        |
| IntPhCQ1           | 0.40        |
| DistNum            | 0.40        |
| DefArt             | 0.40        |
| SymAsymStNeg2      | 0.22        |
| NumN1              | 0.22        |
| SylStr2            | 0.21        |
| NumN2              | 0.21        |
| NumClas            | 0.21        |
| NoGen              | 0.21        |
| ConjUQu            | 0.21        |

**Table S7:** Most involved features for dataset **MBW** (showing only those with involvement > 0.03). The PC1 of the 5 runs explains **73.60%** of variance and the maximum Mantel correlation is **0.62**.

| Feature      | Involvement |
|--------------|-------------|
| PadDem       | 0.98        |
| IndefArt     | 0.98        |
| LatC         | 0.98        |
| OV           | 0.98        |
| WhenC        | 0.98        |
| NomVConj     | 0.98        |
| OvSitEpi     | 0.98        |
| Cons         | 0.98        |
| SV           | 0.98        |
| PastTense    | 0.98        |
| Perfect      | 0.97        |
| AbsComC      | 0.97        |
| NumN         | 0.97        |
| PersMV       | 0.97        |
| PersMAdpos   | 0.97        |
| ApplicativeC | 0.96        |
| OlbPosInfl   | 0.96        |

**Table S8:** Most involved features for dataset *MPE* (showing only those with involvement  $> 0.05$ ). The PC1 of the 5 runs explains **99.93%** of variance and the maximum Mantel correlation is **0.48**.



| Feature             | Involvement |
|---------------------|-------------|
| <b>Redup</b>        | <b>0.98</b> |
| <b>ApplicativeC</b> | <b>0.98</b> |
| <b>AntipassiveC</b> | <b>0.97</b> |
| <b>Perfect</b>      | <b>0.97</b> |
| <b>NomLocPred</b>   | <b>0.97</b> |
| <b>SV</b>           | <b>0.97</b> |
| <b>AbsComC</b>      | <b>0.97</b> |
| <b>MorphImp</b>     | <b>0.97</b> |
| <b>VpersM</b>       | <b>0.97</b> |
| <b>DefArt</b>       | <b>0.97</b> |
| <b>WhenC</b>        | <b>0.97</b> |
| <b>CVRatio</b>      | <b>0.97</b> |
| <b>PastTense</b>    | <b>0.97</b> |
| <b>DegWAdj</b>      | <b>0.97</b> |
| <b>OlbPosInfl</b>   | <b>0.95</b> |
| IndefArt            | 0.78        |
| NumN                | 0.77        |
| SymAsymStNeg        | 0.60        |
| NomVConj            | 0.59        |
| P3PrDem             | 0.59        |
| IntPhCQ             | 0.41        |
| LatC                | 0.41        |
| LmarkPNP            | 0.41        |
| OVA dpNP            | 0.40        |
| NMPron              | 0.40        |
| PredAdj             | 0.40        |
| AdposNP             | 0.22        |
| HandArm             | 0.22        |
| NumClas             | 0.22        |

**Table S9:** Most involved features for dataset **MPW** (showing only those with involvement  $> 0.04$ ). The PC1 of the 5 runs explains **80.83%** of variance and the maximum Mantel correlation is **0.63**.

| Feature           | Involvement |
|-------------------|-------------|
| <b>GenDIPersP</b> | <b>0.98</b> |
| <b>IndefArt</b>   | <b>0.97</b> |
| <b>NomVConj</b>   | <b>0.96</b> |
| IfISVerb          | 0.79        |
| ConjUQu           | 0.22        |

**Table S10:** Most involved features for dataset **BBE** (showing only those with involvement  $> 0.03$ ). The PC1 of the 5 runs explains **91.88%** of variance and the maximum Mantel correlation is **0.50**.

| Feature       | Involvement |
|---------------|-------------|
| PastTense     | 0.99        |
| LmarkPNP      | 0.99        |
| NumN1         | 0.99        |
| P3PrDem       | 0.99        |
| ConjUQu       | 0.99        |
| LatC          | 0.98        |
| SymAsymStNeg2 | 0.98        |
| FixStress     | 0.98        |
| OVAdpNP       | 0.98        |
| SylStr1       | 0.98        |
| IntPhCQ2      | 0.98        |
| PolQPart      | 0.98        |
| VoicPF2       | 0.98        |
| SexGen        | 0.98        |
| GenN1         | 0.79        |
| NomVConj      | 0.79        |
| IndefArt      | 0.78        |
| OccNPlu       | 0.40        |
| Cons1         | 0.22        |
| AbsComC       | 0.21        |
| OlbPosInfl    | 0.21        |
| OrdNum        | 0.21        |
| NumN2         | 0.21        |

**Table S11:** Most involved features for dataset **BBW** (showing only those with involvement > 0.03). The PC1 of the 5 runs explains **89.90%** of variance and the maximum Mantel correlation is **0.58**.

| Feature        | Involvement |
|----------------|-------------|
| IntPhCQ        | 0.98        |
| PerfImpAsp     | 0.98        |
| MTPron         | 0.98        |
| P3PrDem        | 0.98        |
| NomVConj       | 0.98        |
| AbsComC        | 0.98        |
| Cons           | 0.98        |
| VoicPF         | 0.98        |
| OvSitEpi       | 0.97        |
| PolitDPron     | 0.97        |
| ZeroCopPredNom | 0.97        |
| Ncases         | 0.97        |
| OlbPosInfl     | 0.97        |
| GenDIPersP     | 0.97        |
| AntipassiveC   | 0.97        |
| PresUnC        | 0.97        |
| NumN           | 0.97        |
| NumClas        | 0.96        |

**Table S12:** Most involved features for dataset **BPE** (showing only those with involvement  $> 0.03$ ). The PC1 of the 5 runs explains **99.95%** of variance and the maximum Mantel correlation is **0.45**.

| Feature           | Involvement |
|-------------------|-------------|
| <b>MTPron</b>     | <b>0.98</b> |
| <b>IntPhCQ</b>    | <b>0.98</b> |
| <b>VowelN</b>     | <b>0.98</b> |
| <b>OlbPosInfl</b> | <b>0.98</b> |
| <b>NumN</b>       | <b>0.98</b> |
| <b>PastTense</b>  | <b>0.98</b> |
| <b>LmarkC</b>     | <b>0.98</b> |
| <b>NomVConj</b>   | <b>0.97</b> |
| <b>AbsComC</b>    | <b>0.97</b> |
| <b>OvSitEpi</b>   | <b>0.96</b> |
| FutTense          | 0.79        |
| ZeroCopPredNom    | 0.79        |
| Cons              | 0.78        |
| VpersM            | 0.78        |
| FixStress         | 0.78        |
| PersMV            | 0.60        |
| PadDem            | 0.60        |
| OV                | 0.59        |
| P3PrDem           | 0.41        |
| WhenC             | 0.41        |
| PersMAdpos        | 0.40        |

**Table S13:** Most involved features for dataset **BPW** (showing only those with involvement > 0.03). The PC1 of the 5 runs explains **84.30%** of variance and the maximum Mantel correlation is **0.40**.

| Methods     |             | Correlation |                        | $H_0$ rejection ( $\alpha=0.05$ ) concordance |     |     |     |               |                       |
|-------------|-------------|-------------|------------------------|-----------------------------------------------|-----|-----|-----|---------------|-----------------------|
|             |             | $r$         | $p$                    | Contingency table                             |     |     |     | $\chi^2$ test |                       |
|             |             |             |                        | T-T                                           | F-F | T-F | F-T | $\chi^2(1)$   | $p$                   |
| Fisher      | Z-transform | 0.92        | $< 2.2 \cdot 10^{-16}$ | 29                                            | 18  | 0   | 3   | 35.21         | $2.96 \cdot 10^{-9}$  |
|             | Hartung     | 0.92        | $< 2.2 \cdot 10^{-16}$ | 25                                            | 18  | 0   | 7   | 25.09         | $5.48 \cdot 10^{-7}$  |
|             | Makambi     | 0.99        | $< 2.2 \cdot 10^{-16}$ | 30                                            | 18  | 0   | 2   | 38.37         | $5.85 \cdot 10^{-10}$ |
|             | Simes       | -           | -                      | 23                                            | 18  | 0   | 9   | 21.15         | $4.24 \cdot 10^{-6}$  |
| Z-transform | Hartung     | 0.97        | $< 2.2 \cdot 10^{-16}$ | 24                                            | 20  | 1   | 5   | 26.60         | $2.50 \cdot 10^{-7}$  |
|             | Makambi     | 0.90        | $< 2.2 \cdot 10^{-16}$ | 27                                            | 18  | 3   | 2   | 28.33         | $1.02 \cdot 10^{-7}$  |
|             | Simes       | -           | -                      | 20                                            | 18  | 3   | 9   | 12.54         | 0.0004                |
| Hartung     | Makambi     | 0.93        | $< 2.2 \cdot 10^{-16}$ | 25                                            | 20  | 5   | 0   | 30.08         | $4.14 \cdot 10^{-8}$  |
|             | Simes       | -           | -                      | 21                                            | 23  | 2   | 4   | 26.09         | $3.26 \cdot 10^{-7}$  |
| Simes       | Makambi     | -           | -                      | 23                                            | 20  | 7   | 0   | 25.39         | $4.68 \cdot 10^{-7}$  |

**Table S14:** Correlations and concordances between methods for combining  $p$ -values. There is very high agreement between these methods on our data. The **correlation** represents the Pearson's correlation coefficient between the combined  $p$ -values provided by the methods (please note that Simes does not compute a combined  $p$ -value and only provides a decision to reject/not reject  $H_0$  at the chosen  $\alpha$ -level). If we take the  $\alpha$ -level to be 0.05, then these tests reject or not the  $H_0$  and the columns **T-T**, **F-F**, **T-F** and **F-F** represent the number of times the two tests both reject  $H_0$ , both fail to reject it, only the first does reject and only the second, respectively. The last two columns show the  $\chi^2$  test on this contingency table.

| Macro-area          | Interpretation                                                       | Dataset | Composition                                                                                                                                                                                         |
|---------------------|----------------------------------------------------------------------|---------|-----------------------------------------------------------------------------------------------------------------------------------------------------------------------------------------------------|
| Africa <sup>1</sup> | Do all the African language families form a group?                   | MBE     | <i>Afro-Asiatic, Khoisan, Niger-Congo, Nilo-Saharan</i>                                                                                                                                             |
|                     |                                                                      | MBW     | <i>Afro-Asiatic, Khoisan, Niger-Congo, Nilo-Saharan</i>                                                                                                                                             |
|                     |                                                                      | MBH     | <i>Afro-Asiatic, Atlantic-Congo, Central Sudanic, Mande, Nilotic</i>                                                                                                                                |
|                     |                                                                      | MPE     | <i>Afro-Asiatic, Khoisan, Niger-Congo, Nilo-Saharan</i>                                                                                                                                             |
|                     |                                                                      | MPW     | <b>[no Khoisan in this dataset]</b>                                                                                                                                                                 |
|                     |                                                                      | MPH     | <i>Afro-Asiatic, Atlantic-Congo, Central Sudanic, Mande, Nilotic</i>                                                                                                                                |
|                     |                                                                      | BBE     | <i>AfroAsiatic, Khoisan, NigerCongo, NiloSaharan</i>                                                                                                                                                |
|                     |                                                                      | BBW     | <i>AfroAsiatic, Khoisan, NigerCongo, NiloSaharan</i>                                                                                                                                                |
|                     |                                                                      | BBH     | <i>Afro-Asiatic, Atlantic-Congo, Central Sudanic, Mande, Nilotic</i>                                                                                                                                |
|                     |                                                                      | BPE     | <i>AfroAsiatic, Khoisan, NigerCongo, NiloSaharan</i>                                                                                                                                                |
|                     |                                                                      | BPW     | <i>AfroAsiatic, Khoisan, NigerCongo, NiloSaharan</i>                                                                                                                                                |
| BPH                 | <i>Afro-Asiatic, Atlantic-Congo, Central Sudanic, Mande, Nilotic</i> |         |                                                                                                                                                                                                     |
| America             | Do all the American language families form a group?                  | MBE     | <i>Algic, Arawakan, Carib, Chibchan, Hokan, Macro-Ge, Mayan, Na-Dene, Oto-Manguean, Penutian, Salishan, Tucanoan, Tupi, Uto-Aztecan, Wakashan</i>                                                   |
|                     |                                                                      | MBW     | <i>Algic, Arawakan, Cariban, Chibchan, Hokan, Macro-Ge, Na-Dene, Oto-Manguean, Penutian, Salishan, Uto-Aztecan</i>                                                                                  |
|                     |                                                                      | MBH     | <i>Algic, Arawakan, Athapaskan-Eyak-Tlingit, Cariban, Chibchan, Cochimi-Yuman, Eskimo-Aleut, Iroquoian, Je-Jabuti, Mayan, Otomanguean, Panoan, Salishan, Tucanoan, Tupian, Uto-Aztecan</i>          |
|                     |                                                                      | MPE     | <i>Algic, Arawakan, Carib, Chibchan, Eskimo-Aleut, Hokan, Iroquoian, Macro-Ge, Mayan, Na-Dene, Oto-Manguean, Penutian, Salishan, Tucanoan, Tupi, Uto-Aztecan, Wakashan</i>                          |
|                     |                                                                      | MPW     | <i>Algic, Cariban, Na-Dene, Oto-Manguean, Penutian, Uto-Aztecan</i>                                                                                                                                 |
|                     |                                                                      | MPH     | <i>Algic, Arawakan, Athapaskan-Eyak-Tlingit, Cariban, Chibchan, Cochimi-Yuman, Eskimo-Aleut, Iroquoian, Je-Jabuti, Mayan, Otomanguean, Panoan, Salishan, Tucanoan, Tupian, Uto-Aztecan</i>          |
|                     |                                                                      | BBE     | <i>Algic, Arawakan, Aymaran, Carib, Chibchan, Hokan, Iroquoian, MacroGe, MatacoGuaicuru, Mayan, NaDene, OtoManguean, Penutian, Salishan, Tacanan, Tucanoan, Tupi, UtoAztecan, Wakashan, Yanomam</i> |
|                     |                                                                      | BBW     | <i>Algic, Arawakan, Aymaran, Cariban, Chibchan, Hokan, NaDene, OtoManguean, Penutian, Tucanoan, Tupian, UtoAztecan</i>                                                                              |
|                     |                                                                      | BBH     | <i>Algic, Arawakan, Athapaskan-Eyak-Tlingit, Cariban, Chibchan, Cochimi-Yuman, Eskimo-Aleut, Iroquoian, Je-Jabuti, Mayan, Otomanguean, Panoan, Salishan, Tucanoan, Tupian, Uto-Aztecan</i>          |
|                     |                                                                      | BPE     | <i>Algic, Arawakan, Aymaran, Carib, Chibchan, EskimoAleut, Hokan, MacroGe, MatacoGuaicuru, NaDene, OtoManguean, Penutian, Tupi, UtoAztecan</i>                                                      |
|                     |                                                                      | BPW     | <i>Algic, Arawakan, Cariban, Chibchan, Hokan, MacroGe, NaDene, OtoManguean, Penutian, Salishan, UtoAztecan</i>                                                                                      |

1 Given that the **H** classification does not contain “*Khoisan*” or an equivalent grouping, for the four datasets using it (**MBH**, **MPH**, **BBH** and **BPH**) **Africa** and **Africa (w/o Khoisan)** are equivalent. We considered it equivalent to **Africa** as it conceptually tests the coherence of the whole continent with respect to the rest of the world.

| Macro-area                    | Interpretation                                                                                           | Dataset           | Composition                                                                                                                                                                                |
|-------------------------------|----------------------------------------------------------------------------------------------------------|-------------------|--------------------------------------------------------------------------------------------------------------------------------------------------------------------------------------------|
|                               |                                                                                                          | <b>BPH</b>        | <i>Algic, Arawakan, Athapaskan-Eyak-Tlingit, Cariban, Chibchan, Cochimi-Yuman, Eskimo-Aleut, Iroquoian, Je-Jabuti, Mayan, Otomanguean, Panoan, Salishan, Tucanoan, Tupian, Uto-Aztecan</i> |
| <b>S America (vs America)</b> | Do the South American language families form a group relative to the other American language families?   | <b>MBE</b>        | <i>Arawakan, Carib, Macro-Ge, Tucanoan, Tupi</i>                                                                                                                                           |
|                               |                                                                                                          | <b>MBW</b>        | <i>Arawakan, Cariban, Macro-Ge</i>                                                                                                                                                         |
|                               |                                                                                                          | <b>MBH</b>        | <i>Arawakan, Cariban, Chibchan, Je-Jabuti, Panoan, Tucanoan, Tupian</i>                                                                                                                    |
|                               |                                                                                                          | <b>MPE</b>        | <i>Arawakan, Carib, Macro-Ge, Tucanoan, Tupi</i>                                                                                                                                           |
|                               |                                                                                                          | <b>MPW</b>        | <b>[too few language families]</b>                                                                                                                                                         |
|                               |                                                                                                          | <b>MPH</b>        | <i>Arawakan, Cariban, Chibchan, Je-Jabuti, Panoan, Tucanoan, Tupian</i>                                                                                                                    |
|                               |                                                                                                          | <b>BBE</b>        | <i>Arawakan, Aymaran, Carib, MacroGe ,MatacoGuaicuru, Tucanoan, Tupi, Yanomam</i>                                                                                                          |
|                               |                                                                                                          | <b>BBW</b>        | <i>Arawakan, Aymaran, Cariban, Tucanoan, Tupian</i>                                                                                                                                        |
|                               |                                                                                                          | <b>BBH</b>        | <i>Arawakan, Cariban, Chibchan, Je-Jabuti, Panoan, Tucanoan, Tupian</i>                                                                                                                    |
|                               |                                                                                                          | <b>BPE</b>        | <i>Arawakan, Aymaran, Carib, MacroGe, MatacoGuaicuru ,Tupi</i>                                                                                                                             |
|                               |                                                                                                          | <b>BPW</b>        | <i>Arawakan, Cariban, MacroGe</i>                                                                                                                                                          |
|                               |                                                                                                          | <b>BPH</b>        | <i>Arawakan, Cariban, Chibchan, Je-Jabuti, Panoan, Tucanoan, Tupian</i>                                                                                                                    |
| <b>S America (vs world)</b>   | Do the South American language families form a group?                                                    | <b>[as above]</b> |                                                                                                                                                                                            |
| <b>C America (vs America)</b> | Do the Central American language families form a group relative to the other American language families? | <b>MBE</b>        | <i>Chibchan,Mayan,Oto-Manguean,Uto-Aztecan</i>                                                                                                                                             |
|                               |                                                                                                          | <b>MBW</b>        | <i>Chibchan,Oto-Manguean,Uto-Aztecan</i>                                                                                                                                                   |
|                               |                                                                                                          | <b>MBH</b>        | <i>Mayan, Oto-Manguean</i>                                                                                                                                                                 |
|                               |                                                                                                          | <b>MPE</b>        | <i>Chibchan,Mayan,Oto-Manguean,Uto-Aztecan</i>                                                                                                                                             |
|                               |                                                                                                          | <b>MPW</b>        | <b>[too few language families]</b>                                                                                                                                                         |
|                               |                                                                                                          | <b>MPH</b>        | <i>Mayan, Oto-Manguean</i>                                                                                                                                                                 |
|                               |                                                                                                          | <b>BBE</b>        | <i>Chibchan, Mayan, OtoManguean, UtoAztecan</i>                                                                                                                                            |
|                               |                                                                                                          | <b>BBW</b>        | <i>Chibchan, OtoManguean, UtoAztecan</i>                                                                                                                                                   |
|                               |                                                                                                          | <b>BBH</b>        | <i>Mayan, Oto-Manguean</i>                                                                                                                                                                 |
|                               |                                                                                                          | <b>BPE</b>        | <i>Chibchan, OtoManguean, UtoAztecan</i>                                                                                                                                                   |
|                               |                                                                                                          | <b>BPW</b>        | <i>Chibchan, OtoManguean, UtoAztecan</i>                                                                                                                                                   |
|                               |                                                                                                          | <b>BPH</b>        | <i>Mayan, Oto-Manguean</i>                                                                                                                                                                 |

| Macro-area                    | Interpretation                                                                                         | Dataset                  | Composition                                                                                                                                                                                                                      |
|-------------------------------|--------------------------------------------------------------------------------------------------------|--------------------------|----------------------------------------------------------------------------------------------------------------------------------------------------------------------------------------------------------------------------------|
| <b>C America (vs world)</b>   | Do the Central American language families form a group?                                                |                          | [as above]                                                                                                                                                                                                                       |
| <b>N America (vs America)</b> | Do the North American language families form a group relative to the other American language families? | <b>MBE</b>               | <i>Algic, Hokan, Na-Dene, Penutian, Salishan, Wakashan</i>                                                                                                                                                                       |
|                               |                                                                                                        | <b>MBW</b>               | <i>Algic, Hokan, Na-Dene, Penutian, Salishan</i>                                                                                                                                                                                 |
|                               |                                                                                                        | <b>MBH</b>               | <i>Algic, Athapaskan-Eyak-Tlingit, Cochimi-Yuman, Eskimo-Aleut, Iroquoian, Salishan, Uto-Aztecan</i>                                                                                                                             |
|                               |                                                                                                        | <b>MPE</b>               | <i>Algic, Eskimo-Aleut, Hokan, Iroquoian, Na-Dene, Penutian, Salishan, Wakashan</i>                                                                                                                                              |
|                               |                                                                                                        | <b>MPW</b>               | <i>Algic, Na-Dene, Penutian</i>                                                                                                                                                                                                  |
|                               |                                                                                                        | <b>MPH</b>               | <i>Algic, Athapaskan-Eyak-Tlingit, Cochimi-Yuman, Eskimo-Aleut, Iroquoian, Salishan, Uto-Aztecan</i>                                                                                                                             |
|                               |                                                                                                        | <b>BBE</b>               | <i>Algic, Hokan, Iroquoian, NaDene, Penutian, Salishan, Tacanan, Wakashan</i>                                                                                                                                                    |
|                               |                                                                                                        | <b>BBW</b>               | <i>Algic, Hokan, NaDene, Penutian</i>                                                                                                                                                                                            |
|                               |                                                                                                        | <b>BBH</b>               | <i>Algic, Athapaskan-Eyak-Tlingit, Cochimi-Yuman, Eskimo-Aleut, Iroquoian, Salishan, Uto-Aztecan</i>                                                                                                                             |
|                               |                                                                                                        | <b>BPE</b>               | <i>Algic, EskimoAleut, Hokan, NaDene, Penutian</i>                                                                                                                                                                               |
|                               |                                                                                                        | <b>BPW</b>               | <i>Algic, Hokan, NaDene, Penutian, Salishan</i>                                                                                                                                                                                  |
|                               |                                                                                                        | <b>BPH</b>               | <i>Algic, Athapaskan-Eyak-Tlingit, Cochimi-Yuman, Eskimo-Aleut, Iroquoian, Salishan, Uto-Aztecan</i>                                                                                                                             |
| <b>N America (vs world)</b>   | Do the North American language families form a group?                                                  |                          | [as above]                                                                                                                                                                                                                       |
| <b>America + Siberia</b>      | Do the American and Siberian language families form a group?                                           | <b>MBE</b>               | <i>Algic, Arawakan, Carib, Chibchan, <b>Chukotko-Kamchatkan</b>, Hokan, Macro-Ge, Mayan, Na-Dene, Oto-Manguean, Penutian, Salishan, Tucanoan, Tupi, Uto-Aztecan, Wakashan</i>                                                    |
|                               |                                                                                                        | <b>MBW</b>               | [no Siberian language families]                                                                                                                                                                                                  |
|                               |                                                                                                        | <b>MBH</b>               | <i>Algic, Arawakan, Athapaskan-Eyak-Tlingit, Cariban, Chibchan, Cochimi-Yuman, Eskimo-Aleut, Iroquoian, Je-Jabuti, Mayan, Otomanguean, Panoan, Salishan, Tucanoan, Tupian, Uto-Aztecan, <b>Chukotko-Kamchatkan</b></i>           |
|                               |                                                                                                        | <b>MBH<sup>(*)</sup></b> | <i>Algic, Arawakan, Athapaskan-Eyak-Tlingit, Cariban, Chibchan, Cochimi-Yuman, Eskimo-Aleut, Iroquoian, Je-Jabuti, Mayan, Otomanguean, Panoan, Salishan, Tucanoan, Tupian, Uto-Aztecan, <b>Chukotko-Kamchatkan, Tungusic</b></i> |
|                               |                                                                                                        | <b>MPE</b>               | <i>Algic, Arawakan, Carib, Chibchan, <b>Chukotko-Kamchatkan</b>, Eskimo-Aleut, Hokan, Iroquoian, Macro-Ge, Mayan, Na-Dene, Oto-Manguean, Penutian, Salishan, Tucanoan, Tupi, Uto-Aztecan, Wakashan</i>                           |
|                               |                                                                                                        | <b>MPW</b>               | [no Siberian language families]                                                                                                                                                                                                  |
|                               |                                                                                                        | <b>MPH</b>               | <i>Algic, Arawakan, Athapaskan-Eyak-Tlingit, Cariban, Chibchan, Cochimi-Yuman, Eskimo-Aleut, Iroquoian, Je-Jabuti, Mayan, Otomanguean, Panoan, Salishan, Tucanoan, Tupian, Uto-Aztecan, <b>Chukotko-Kamchatkan</b></i>           |
|                               |                                                                                                        | <b>MPH<sup>(*)</sup></b> | <i>Algic, Arawakan, Athapaskan-Eyak-Tlingit, Cariban, Chibchan, Cochimi-Yuman, Eskimo-Aleut, Iroquoian, Je-Jabuti, Mayan, Otomanguean, Panoan, Salishan, Tucanoan, Tupian, Uto-Aztecan, <b>Chukotko-Kamchatkan, Tungusic</b></i> |

\* For the **H** classification, two North-Eastern Eurasian (“Siberian”) language families can be included in the testing, *Chukotko-Kamchatkan* and *Tungusic*. To also ensure comparability with the other two classifications, we tested two sets, one including only *Chukotko-Kamchatkan* within “Siberia”, and another one, marked with a star (\*), including both these families within “Siberia”.



| Macro-area                 | Interpretation                                                                                                | Dataset                  | Composition                                                                                                                                                                                                                              |
|----------------------------|---------------------------------------------------------------------------------------------------------------|--------------------------|------------------------------------------------------------------------------------------------------------------------------------------------------------------------------------------------------------------------------------------|
|                            |                                                                                                               | <b>BBE</b>               | <i>Algic, Arawakan, Aymaran, Carib, Chibchan, <b>ChukotkoKamchatkan</b>, Hokan, Iroquoian, MacroGe, MatacoGuaicuru, Mayan, NaDene, OtoManguean, Penutian, Salishan, Tacanan, Tucanoan, Tupi, UtoAztecan, Wakashan, Yanomam, Yukaghir</i> |
|                            |                                                                                                               | <b>BBW</b>               | <b>[no Siberian language families]</b>                                                                                                                                                                                                   |
|                            |                                                                                                               | <b>BBH</b>               | <i>Algic, Arawakan, Athapaskan-Eyak-Tlingit, Cariban, Chibchan, Cochimi-Yuman, Eskimo-Aleut, Iroquoian, Je-Jabuti, Mayan, Otomanguean, Panoan, Salishan, Tucanoan, Tupian, Uto-Aztecan, <b>Chukotko-Kamchatkan</b></i>                   |
|                            |                                                                                                               | <b>BBH<sup>(*)</sup></b> | <i>Algic, Arawakan, Athapaskan-Eyak-Tlingit, Cariban, Chibchan, Cochimi-Yuman, Eskimo-Aleut, Iroquoian, Je-Jabuti, Mayan, Otomanguean, Panoan, Salishan, Tucanoan, Tupian, Uto-Aztecan, <b>Chukotko-Kamchatkan, Tungusic</b></i>         |
|                            |                                                                                                               | <b>BPE</b>               | <b>[no Siberian language families]</b>                                                                                                                                                                                                   |
|                            |                                                                                                               | <b>BPW</b>               | <b>[no Siberian language families]</b>                                                                                                                                                                                                   |
|                            |                                                                                                               | <b>BPH</b>               | <i>Algic, Arawakan, Athapaskan-Eyak-Tlingit, Cariban, Chibchan, Cochimi-Yuman, Eskimo-Aleut, Iroquoian, Je-Jabuti, Mayan, Otomanguean, Panoan, Salishan, Tucanoan, Tupian, Uto-Aztecan, <b>Chukotko-Kamchatkan</b></i>                   |
|                            |                                                                                                               | <b>BPH<sup>(*)</sup></b> | <i>Algic, Arawakan, Athapaskan-Eyak-Tlingit, Cariban, Chibchan, Cochimi-Yuman, Eskimo-Aleut, Iroquoian, Je-Jabuti, Mayan, Otomanguean, Panoan, Salishan, Tucanoan, Tupian, Uto-Aztecan, <b>Chukotko-Kamchatkan, Tungusic</b></i>         |
| <b>S America + Siberia</b> | Is Siberia special among world's language families in being close to South America?)                          | <b>MBE</b>               | <i>Arawakan, Carib, <b>Chukotko-Kamchatkan</b>, Macro-Ge, Tucanoan, Tupi</i>                                                                                                                                                             |
|                            |                                                                                                               | <b>MBW</b>               | <b>[no Siberian language families]</b>                                                                                                                                                                                                   |
|                            |                                                                                                               | <b>MBH</b>               | <i>Arawakan, Cariban, Chibchan, Je-Jabuti, Panoan, Tucanoan, Tupian, <b>Chukotko-Kamchatkan</b></i>                                                                                                                                      |
|                            |                                                                                                               | <b>MBH<sup>(*)</sup></b> | <i>Arawakan, Cariban, Chibchan, Je-Jabuti, Panoan, Tucanoan, Tupian, <b>Chukotko-Kamchatkan, Tungusic</b></i>                                                                                                                            |
|                            |                                                                                                               | <b>MPE</b>               | <i>Arawakan, Carib, <b>Chukotko-Kamchatkan</b>, Macro-Ge, Tucanoan, Tupi</i>                                                                                                                                                             |
|                            |                                                                                                               | <b>MPW</b>               | <b>[no Siberian language families]</b>                                                                                                                                                                                                   |
|                            |                                                                                                               | <b>MPH</b>               | <i>Arawakan, Cariban, Chibchan, Je-Jabuti, Panoan, Tucanoan, Tupian, <b>Chukotko-Kamchatkan</b></i>                                                                                                                                      |
|                            |                                                                                                               | <b>MPH<sup>(*)</sup></b> | <i>Arawakan, Cariban, Chibchan, Je-Jabuti, Panoan, Tucanoan, Tupian, <b>Chukotko-Kamchatkan, Tungusic</b></i>                                                                                                                            |
|                            |                                                                                                               | <b>BBE</b>               | <i>Arawakan, Aymaran, Carib, <b>ChukotkoKamchatkan</b>, MacroGe, MatacoGuaicuru, Tucanoan, Tupi, Yanomam, Yukaghir</i>                                                                                                                   |
|                            |                                                                                                               | <b>BBW</b>               | <b>[no Siberian language families]</b>                                                                                                                                                                                                   |
|                            |                                                                                                               | <b>BBH</b>               | <i>Arawakan, Cariban, Chibchan, Je-Jabuti, Panoan, Tucanoan, Tupian, <b>Chukotko-Kamchatkan</b></i>                                                                                                                                      |
|                            |                                                                                                               | <b>BBH<sup>(*)</sup></b> | <i>Arawakan, Cariban, Chibchan, Je-Jabuti, Panoan, Tucanoan, Tupian, <b>Chukotko-Kamchatkan, Tungusic</b></i>                                                                                                                            |
|                            |                                                                                                               | <b>BPE</b>               | <b>[no Siberian language families]</b>                                                                                                                                                                                                   |
|                            |                                                                                                               | <b>BPW</b>               | <b>[no Siberian language families]</b>                                                                                                                                                                                                   |
| <b>BPH</b>                 | <i>Arawakan, Cariban, Chibchan, Je-Jabuti, Panoan, Tucanoan, Tupian, <b>Chukotko-Kamchatkan</b></i>           |                          |                                                                                                                                                                                                                                          |
| <b>BPH<sup>(*)</sup></b>   | <i>Arawakan, Cariban, Chibchan, Je-Jabuti, Panoan, Tucanoan, Tupian, <b>Chukotko-Kamchatkan, Tungusic</b></i> |                          |                                                                                                                                                                                                                                          |
| <b>C America + Siberia</b> | Is Siberia special among world's language families in being close to Central America?)                        | <b>MBE</b>               | <i>Chibchan, <b>Chukotko-Kamchatkan</b>, Mayan, Oto-Manguean, Uto-Aztecan</i>                                                                                                                                                            |
|                            |                                                                                                               | <b>MBW</b>               | <b>[no Siberian language families]</b>                                                                                                                                                                                                   |
|                            |                                                                                                               | <b>MBH</b>               | <i>Mayan, Oto-Manguean, <b>Chukotko-Kamchatkan</b></i>                                                                                                                                                                                   |

| Macro-area         | Interpretation                                                                                                                       | Dataset             | Composition                                                                          |
|--------------------|--------------------------------------------------------------------------------------------------------------------------------------|---------------------|--------------------------------------------------------------------------------------|
|                    |                                                                                                                                      | MBH <sup>(*)</sup>  | Mayan, Oto-Manguean, <b>Chukotko-Kamchatkan</b> , Tungusic                           |
|                    |                                                                                                                                      | MPE                 | Chibchan, <b>Chukotko-Kamchatkan</b> , Mayan, Oto-Manguean, Uto-Aztecan              |
|                    |                                                                                                                                      | MPW                 | [no Siberian language families]                                                      |
|                    |                                                                                                                                      | MPH                 | Mayan, Oto-Manguean, <b>Chukotko-Kamchatkan</b>                                      |
|                    |                                                                                                                                      | MPH <sup>(*)</sup>  | Mayan, Oto-Manguean, <b>Chukotko-Kamchatkan</b> , Tungusic                           |
|                    |                                                                                                                                      | BBE                 | Chibchan, <b>ChukotkoKamchatkan</b> , Mayan, OtoManguean, UtoAztecan, Yukaghir       |
|                    |                                                                                                                                      | BBW                 | [no Siberian language families]                                                      |
|                    |                                                                                                                                      | BBH                 | Mayan, Oto-Manguean, <b>Chukotko-Kamchatkan</b>                                      |
|                    |                                                                                                                                      | BBH <sup>(*)</sup>  | Mayan, Oto-Manguean, <b>Chukotko-Kamchatkan</b> , Tungusic                           |
|                    |                                                                                                                                      | BPE                 | [no Siberian language families]                                                      |
|                    |                                                                                                                                      | BPW                 | [no Siberian language families]                                                      |
|                    |                                                                                                                                      | BPH                 | Mayan, Oto-Manguean, <b>Chukotko-Kamchatkan</b>                                      |
|                    |                                                                                                                                      | BPH <sup>(*)</sup>  | Mayan, Oto-Manguean, <b>Chukotko-Kamchatkan</b> , Tungusic                           |
|                    |                                                                                                                                      | N America + Siberia | Is Siberia special among world's language families in being close to North America?) |
| MBW                | [no Siberian language families]                                                                                                      |                     |                                                                                      |
| MBH                | Algic, Athapaskan-Eyak-Tlingit, Cochimi-Yuman, Eskimo-Aleut, Iroquoian, Salishan, Uto-Aztecan, <b>Chukotko-Kamchatkan</b>            |                     |                                                                                      |
| MBH <sup>(*)</sup> | Algic, Athapaskan-Eyak-Tlingit, Cochimi-Yuman, Eskimo-Aleut, Iroquoian, Salishan, Uto-Aztecan, <b>Chukotko-Kamchatkan</b> , Tungusic |                     |                                                                                      |
| MPE                | Algic, <b>Chukotko-Kamchatkan</b> , Eskimo-Aleut, Hokan, Iroquoian, Na-Dene, Penutian, Salishan, Wakashan                            |                     |                                                                                      |
| MPW                | [no Siberian language families]                                                                                                      |                     |                                                                                      |
| MPH                | Algic, Athapaskan-Eyak-Tlingit, Cochimi-Yuman, Eskimo-Aleut, Iroquoian, Salishan, Uto-Aztecan, <b>Chukotko-Kamchatkan</b>            |                     |                                                                                      |
| MPH <sup>(*)</sup> | Algic, Athapaskan-Eyak-Tlingit, Cochimi-Yuman, Eskimo-Aleut, Iroquoian, Salishan, Uto-Aztecan, <b>Chukotko-Kamchatkan</b> , Tungusic |                     |                                                                                      |
| BBE                | Algic, <b>ChukotkoKamchatkan</b> , Hokan, Iroquoian, NaDene, Penutian, Salishan, Tacanan, Wakashan, Yukaghir                         |                     |                                                                                      |
| BBW                | [no Siberian language families]                                                                                                      |                     |                                                                                      |
| BBH                | Algic, Athapaskan-Eyak-Tlingit, Cochimi-Yuman, Eskimo-Aleut, Iroquoian, Salishan, Uto-Aztecan, <b>Chukotko-Kamchatkan</b>            |                     |                                                                                      |
| BBH <sup>(*)</sup> | Algic, Athapaskan-Eyak-Tlingit, Cochimi-Yuman, Eskimo-Aleut, Iroquoian, Salishan, Uto-Aztecan, <b>Chukotko-Kamchatkan</b> , Tungusic |                     |                                                                                      |
| BPE                | [no Siberian language families]                                                                                                      |                     |                                                                                      |
| BPW                | [no Siberian language families]                                                                                                      |                     |                                                                                      |
| BPH                | Algic, Athapaskan-Eyak-Tlingit, Cochimi-Yuman, Eskimo-Aleut, Iroquoian, Salishan, Uto-Aztecan, <b>Chukotko-Kamchatkan</b>            |                     |                                                                                      |
| BPH <sup>(*)</sup> | Algic, Athapaskan-Eyak-Tlingit, Cochimi-Yuman, Eskimo-Aleut, Iroquoian, Salishan, Uto-Aztecan, <b>Chukotko-Kamchatkan</b> , Tungusic |                     |                                                                                      |

| Macro-area   | Interpretation                                                                                              | Dataset | Composition                                                                                                                                      |
|--------------|-------------------------------------------------------------------------------------------------------------|---------|--------------------------------------------------------------------------------------------------------------------------------------------------|
| Eurasia      | Do the Eurasian language families from a group?                                                             | MBE     | <i>Afro-Asiatic, Altaic, Austro-Asiatic, Chukotko-Kamchatkan, Dravidian, Indo-European, North-Caucasian, Sino-Tibetan, Tai-Kadai, Uralic</i>     |
|              |                                                                                                             | MBW     | <i>Afro-Asiatic, Altaic, Austro-Asiatic, Dravidian, Indo-European, Nakh-Daghestanian, Sino-Tibetan, Uralic</i>                                   |
|              |                                                                                                             | MBH     | <i>Chukotko-Kamchatkan, Dravidian, Indo-European, Mongolic, Nakh-Daghestanian, Tungusic, Turkic, Uralic</i>                                      |
|              |                                                                                                             | MPE     | <i>Afro-Asiatic, Altaic, Austro-Asiatic, Chukotko-Kamchatkan, Dravidian, Indo-European, North-Caucasian, Sino-Tibetan, Tai-Kadai, Uralic</i>     |
|              |                                                                                                             | MPW     | <i>Afro-Asiatic, Altaic, Austro-Asiatic, Indo-European, Nakh-Daghestanian, Sino-Tibetan, Uralic</i>                                              |
|              |                                                                                                             | MPH     | <i>Chukotko-Kamchatkan, Dravidian, Indo-European, Mongolic, Nakh-Daghestanian, Tungusic, Turkic, Uralic</i>                                      |
|              |                                                                                                             | BBE     | <i>AfroAsiatic, Altaic, AustroAsiatic, ChukotkoKamchatkan, Dravidian, IndoEuropean, North Caucasian, SinoTibetan, TaiKadai, Uralic, Yukaghir</i> |
|              |                                                                                                             | BBW     | <i>AfroAsiatic, Altaic, AustroAsiatic, Dravidian, IndoEuropean, NakhDaghestanian, SinoTibetan, Uralic</i>                                        |
|              |                                                                                                             | BBH     | <i>Chukotko-Kamchatkan, Dravidian, Indo-European, Mongolic, Nakh-Daghestanian, Tungusic, Turkic, Uralic</i>                                      |
|              |                                                                                                             | BPE     | <i>AfroAsiatic, Altaic, AustroAsiatic, Dravidian, IndoEuropean, North Caucasian, SinoTibetan</i>                                                 |
|              |                                                                                                             | BPW     | <i>AfroAsiatic, Altaic, AustroAsiatic, Dravidian, IndoEuropean, NakhDaghestanian, SinoTibetan, Uralic</i>                                        |
| BPH          | <i>Chukotko-Kamchatkan, Dravidian, Indo-European, Mongolic, Nakh-Daghestanian, Tungusic, Turkic, Uralic</i> |         |                                                                                                                                                  |
| Core Eurasia | A reduced set of “true” Eurasian language families                                                          | MBE     | <i>Altaic, Dravidian, Indo-European, North-Caucasian, Uralic</i>                                                                                 |
|              |                                                                                                             | MBW     | <i>Altaic, Dravidian, Indo-European, Nakh-Daghestanian, Uralic</i>                                                                               |
|              |                                                                                                             | MBH     | <i>Dravidian, Indo-European, Mongolic, Nakh-Daghestanian, Turkic, Uralic</i>                                                                     |
|              |                                                                                                             | MPE     | <i>Altaic, Dravidian, Indo-European, North-Caucasian, Uralic</i>                                                                                 |
|              |                                                                                                             | MPW     | <i>Altaic, Indo-European, Nakh-Daghestanian, Uralic</i>                                                                                          |
|              |                                                                                                             | MPH     | <i>Dravidian, Indo-European, Mongolic, Nakh-Daghestanian, Turkic, Uralic</i>                                                                     |
|              |                                                                                                             | BBE     | <i>Altaic, Dravidian, IndoEuropean, NakhDaghestanian, Uralic</i>                                                                                 |
|              |                                                                                                             | BBW     | <i>Altaic, Dravidian, IndoEuropean, NakhDaghestanian, Uralic</i>                                                                                 |
|              |                                                                                                             | BBH     | <i>Dravidian, Indo-European, Mongolic, Nakh-Daghestanian, Turkic, Uralic</i>                                                                     |
|              |                                                                                                             | BPE     | <i>Altaic, Dravidian, IndoEuropean, North Caucasian, Uralic</i>                                                                                  |
|              |                                                                                                             | BPW     | <i>Altaic, Dravidian, IndoEuropean, NakhDaghestanian, Uralic</i>                                                                                 |
| BPH          | <i>Dravidian, Indo-European, Mongolic, Nakh-Daghestanian, Turkic, Uralic</i>                                |         |                                                                                                                                                  |
| Nostratic v1 | A core set of language families across various Nostratic proposals.                                         | MBE     | <i>Altaic, Indo-European, Uralic</i>                                                                                                             |
|              |                                                                                                             | MBW     | <i>Altaic, Indo-European, Uralic</i>                                                                                                             |
|              |                                                                                                             | MBH     | <i>Indo-European, Uralic, Mongolic, Turkic</i>                                                                                                   |
|              |                                                                                                             | MPE     | <i>Altaic, Indo-European, Uralic</i>                                                                                                             |
|              |                                                                                                             | MPW     | <i>Altaic, Indo-European, Uralic</i>                                                                                                             |
|              |                                                                                                             | MPH     | <i>Indo-European, Uralic, Mongolic, Turkic</i>                                                                                                   |

| Macro-area   | Interpretation                                | Dataset | Composition                                           |
|--------------|-----------------------------------------------|---------|-------------------------------------------------------|
|              |                                               | BBE     | <i>Altaic, IndoEuropean, Uralic</i>                   |
|              |                                               | BBW     | <i>Altaic, IndoEuropean, Uralic</i>                   |
|              |                                               | BBH     | <i>Indo-European, Uralic, Mongolic, Turkic</i>        |
|              |                                               | BPE     | <i>Altaic, IndoEuropean, Uralic</i>                   |
|              |                                               | BPW     | <i>Altaic, IndoEuropean, Uralic</i>                   |
|              |                                               | BPH     | <i>Indo-European, Uralic, Mongolic, Turkic</i>        |
| Nostratic v2 | A variant definition of Nostratic.            | MBE     | <i>Afro-Asiatic, Dravidian, Indo-European, Uralic</i> |
|              |                                               | MBW     | <i>Afro-Asiatic, Dravidian, Indo-European, Uralic</i> |
|              |                                               | MBH     | <i>Indo-European, Uralic, Dravidian, Afro-Asiatic</i> |
|              |                                               | MPE     | <i>Afro-Asiatic, Dravidian, Indo-European, Uralic</i> |
|              |                                               | MPW     | <i>Afro-Asiatic, Indo-European, Uralic</i>            |
|              |                                               | MPH     | <i>Indo-European, Uralic, Dravidian, Afro-Asiatic</i> |
|              |                                               | BBE     | <i>AfroAsiatic, Dravidian, IndoEuropean, Uralic</i>   |
|              |                                               | BBW     | <i>AfroAsiatic, Dravidian, IndoEuropean, Uralic</i>   |
|              |                                               | BBH     | <i>Indo-European, Uralic, Dravidian, Afro-Asiatic</i> |
|              |                                               | BPE     | <i>AfroAsiatic, Dravidian, IndoEuropean, Uralic</i>   |
|              |                                               | BPW     | <i>AfroAsiatic, Dravidian, IndoEuropean, Uralic</i>   |
|              |                                               | BPH     | <i>Indo-European, Uralic, Dravidian, Afro-Asiatic</i> |
| PNG          | Do the Papuan language families form a group? | MBE     | <i>Sepik, Trans-New-Guinea, West-Papuan</i>           |
|              |                                               | MBW     | <b>[not enough Papuan language families]</b>          |
|              |                                               | MBH     | <i>North Halmahera, Sepik, Trans-New Guinea</i>       |
|              |                                               | MPE     | <i>Sepik, Trans-New-Guinea</i>                        |
|              |                                               | MPW     | <b>[not enough Papuan language families]</b>          |
|              |                                               | MPH     | <i>North Halmahera, Sepik, Trans-New Guinea</i>       |
|              |                                               | BBE     | <i>Sepik, TransNew Guinea, West Papuan</i>            |
|              |                                               | BBW     | <b>[not enough Papuan language families]</b>          |
|              |                                               | BBH     | <i>North Halmahera, Sepik, Trans-New Guinea</i>       |
|              |                                               | BPE     | <b>[not enough Papuan language families]</b>          |
|              |                                               | BPW     | <b>[not enough Papuan language families]</b>          |
|              |                                               | BBH     | <i>North Halmahera, Sepik, Trans-New Guinea</i>       |

| Macro-area                  | Interpretation                                                             | Dataset | Composition                                                                |
|-----------------------------|----------------------------------------------------------------------------|---------|----------------------------------------------------------------------------|
| PNG + Australia             | Do the Papuan and Australian language families form a group?               | MBE     | <i>Australian, Sepik, Trans-New-Guinea, West-Papuan</i>                    |
|                             |                                                                            | MBW     | <i>Australian, Sepik</i>                                                   |
|                             |                                                                            | MBH     | <i>Gunwinyguan, North Halmahera, Pama-Nyungan, Sepik, Trans-New Guinea</i> |
|                             |                                                                            | MPE     | <i>Australian, Sepik, Trans-New-Guinea</i>                                 |
|                             |                                                                            | MPW     | <i>Australian, Trans-New Guinea</i>                                        |
|                             |                                                                            | MPH     | <i>Gunwinyguan, North Halmahera, Pama-Nyungan, Sepik, Trans-New Guinea</i> |
|                             |                                                                            | BBE     | <i>Australian, Sepik, TransNew Guinea, West Papuan</i>                     |
|                             |                                                                            | BBW     | <i>Australian, Trans-New Guinea</i>                                        |
|                             |                                                                            | BBH     | <i>Gunwinyguan, North Halmahera, Pama-Nyungan, Sepik, Trans-New Guinea</i> |
|                             |                                                                            | BPE     | <i>Australian, Tran-sNew Guinea</i>                                        |
|                             |                                                                            | BPW     | <i>Australian, Sepik</i>                                                   |
| BPH                         | <i>Gunwinyguan, North Halmahera, Pama-Nyungan, Sepik, Trans-New Guinea</i> |         |                                                                            |
| South-East Asia and Oceania | A set of languages of SE Asia and Austronesian.                            | MBE     | <i>Austro-Asiatic, Austronesian, Sino-Tibetan, Tai-Kadai</i>               |
|                             |                                                                            | MBW     | <i>Austro-Asiatic, Austronesian, Sino-Tibetan</i>                          |
|                             |                                                                            | MBH     | <i>Austro-Asiatic, Austronesian, Sino-Tibetan, Tai-Kadai</i>               |
|                             |                                                                            | MPE     | <i>Austro-Asiatic, Austronesian, Sino-Tibetan, Tai-Kadai</i>               |
|                             |                                                                            | MPW     | <i>Austro-Asiatic, Austronesian, Sino-Tibetan</i>                          |
|                             |                                                                            | MPH     | <i>Austro-Asiatic, Austronesian, Sino-Tibetan, Tai-Kadai</i>               |
|                             |                                                                            | BBE     | <i>Austro-Asiatic, Austronesian, SinoTibetan, TaiKadai</i>                 |
|                             |                                                                            | BBW     | <i>Austro-Asiatic, Austronesian</i>                                        |
|                             |                                                                            | BBH     | <i>Austro-Asiatic, Austronesian, Sino-Tibetan, Tai-Kadai</i>               |
|                             |                                                                            | BPE     | <i>AustroAsiatic, Austronesian, SinoTibetan</i>                            |
|                             |                                                                            | BPW     | <i>AustroAsiatic, Austronesian, SinoTibetan</i>                            |
| BPH                         | <i>Austro-Asiatic, Austronesian, Sino-Tibetan, Tai-Kadai</i>               |         |                                                                            |
| Austro-Tai                  | Do Austronesian and Tai-Kadai families form a group?                       | MBE     | <i>Austro-Asiatic, Tai-Kadai</i>                                           |
|                             |                                                                            | MBW     | <b>[not enough language families]</b>                                      |
|                             |                                                                            | MBH     | <i>Austro-Asiatic, Tai-Kadai</i>                                           |
|                             |                                                                            | MPE     | <i>Austro-Asiatic, Tai-Kadai</i>                                           |
|                             |                                                                            | MPW     | <b>[not enough language families]</b>                                      |
|                             |                                                                            | MPH     | <i>Austro-Asiatic, Tai-Kadai</i>                                           |

| Macro-area                    | Interpretation                           | Dataset    | Composition                              |
|-------------------------------|------------------------------------------|------------|------------------------------------------|
|                               |                                          | <b>BBE</b> | <i>Austro-Asiatic, Tai-Kadai</i>         |
|                               |                                          | <b>BBW</b> | <b>[not enough language families]</b>    |
|                               |                                          | <b>BBH</b> | <i>Austro-Asiatic, Tai-Kadai</i>         |
|                               |                                          | <b>BPE</b> | <b>[not enough language families]</b>    |
|                               |                                          | <b>BPW</b> | <b>[not enough language families]</b>    |
|                               |                                          | <b>BPH</b> | <i>Austro-Asiatic, Tai-Kadai</i>         |
| <b>Australia</b> <sup>2</sup> | Do the Australian families form a group? | <b>MBE</b> | <b>[N/A (see footnote <sup>2</sup>)]</b> |
|                               |                                          | <b>MBW</b> | <b>[N/A (see footnote <sup>2</sup>)]</b> |
|                               |                                          | <b>MBH</b> | <i>Gunwinyguan, Pama-Nyungan</i>         |
|                               |                                          | <b>MPE</b> | <b>[N/A (see footnote <sup>2</sup>)]</b> |
|                               |                                          | <b>MPW</b> | <b>[N/A (see footnote <sup>2</sup>)]</b> |
|                               |                                          | <b>MPH</b> | <i>Gunwinyguan, Pama-Nyungan</i>         |
|                               |                                          | <b>BBE</b> | <b>[N/A (see footnote <sup>2</sup>)]</b> |
|                               |                                          | <b>BBW</b> | <b>[N/A (see footnote <sup>2</sup>)]</b> |
|                               |                                          | <b>BBH</b> | <i>Gunwinyguan, Pama-Nyungan</i>         |
|                               |                                          | <b>BPE</b> | <b>[N/A (see footnote <sup>2</sup>)]</b> |
|                               |                                          | <b>BPW</b> | <b>[N/A (see footnote <sup>2</sup>)]</b> |
|                               |                                          | <b>BPH</b> | <i>Gunwinyguan, Pama-Nyungan</i>         |

**Table S15:** The sets of language families considered with their interpretation and composition for each dataset.

<sup>2</sup> Only classification **H** proposes more than a single language family for **Australia** (the other two have a single controversial construct “*Australian*”), making the testing of this hypothesis possible only for the four datasets using **H** (**MBH**, **MPH**, **BBH** and **BPH**).

| Macro-area             | Geo | P-values for each dataset |             |                                 |        |       |                      |        |        |                    |                     |       |                      | Paired t-test                | Methods for combining p-values                 |                                                |                                  |              |            |                                                |              |
|------------------------|-----|---------------------------|-------------|---------------------------------|--------|-------|----------------------|--------|--------|--------------------|---------------------|-------|----------------------|------------------------------|------------------------------------------------|------------------------------------------------|----------------------------------|--------------|------------|------------------------------------------------|--------------|
|                        |     | BBE                       | BBW         | BBH                             | BPE    | BPW   | BPH                  | MBE    | MBW    | MBH                | MPE                 | MPW   | MPH                  |                              | F                                              | Z                                              | H                                |              | S          | M                                              |              |
|                        |     |                           |             |                                 |        |       |                      |        |        |                    |                     |       |                      |                              |                                                |                                                | p                                | r            |            | p                                              | r            |
| Africa                 | No  | 0.51                      | 0.40        | 0.53                            | 0.008  | 0.012 | 0.22                 | 0.72   | 0.13   | 0.42               | 0.57                | -     | 0.28                 | $t_{10} = -3.90$             | 0.029                                          | 0.020                                          | <b>0.074</b>                     | 0.06         | No         | 0.029                                          | 0.00         |
|                        | Yes | 0.87                      | 0.71        | 0.55                            | 0.052  | 0.032 | 0.19                 | 0.88   | 0.36   | 0.60               | 0.74                | -     | 0.44                 | $p = 0.0029$                 | 0.36                                           | <b>0.39</b>                                    | <b>0.39</b>                      | -0.05        | No         | 0.36                                           | 0.00         |
| America                | No  | $< 10^{-4}$               | $< 10^{-4}$ | 0.0059                          | 0.016  | 0.004 | 0.010                | 0.0076 | 0.036  | 0.034              | 0.001               | 0.079 | 0.03                 | $t_{11} = -2.64$             | 0.00 <sup>†</sup>                              | 0.00                                           | <b>0.0003</b>                    | 0.45         | Yes        | $1.89 \cdot 10^{-15}$                          | 0.00         |
|                        | Yes | 0.30                      | 0.0002      | 0.0018                          | 0.37   | 0.022 | 0.0023               | 0.11   | 0.32   | 0.14               | 0.03                | 0.052 | 0.11                 | $p = 0.023$                  | <b><math>2.69 \cdot 10^{-8}</math></b>         | $6.53 \cdot 10^{-9}$                           | $1.2 \cdot 10^{-14}$             | -0.09        | Yes        | <b><math>2.69 \cdot 10^{-8}</math></b>         | 0.00         |
| S America (vs world)   | No  | 0.044                     | 0.0018      | 0.038                           | 0.30   | 0.28  | 0.12                 | 0.0098 | 0.032  | 0.022              | 0.0037              | -     | 0.026                | $t_{10} = -1.95$             | $5.05 \cdot 10^{-8}$                           | $1.98 \cdot 10^{-9}$                           | <b>0.0054</b>                    | 0.42         | Yes        | $5.05 \cdot 10^{-8}$                           | 0.00         |
|                        | Yes | 0.63                      | 0.0087      | 0.032                           | 0.75   | 0.38  | 0.10                 | 0.031  | 0.12   | 0.066              | 0.0125              | -     | 0.0605               | $p = 0.079$                  | $9.89 \cdot 10^{-5}$                           | $3.47 \cdot 10^{-5}$                           | <b>0.00018</b>                   | -0.02        | No         | $9.89 \cdot 10^{-5}$                           | 0.00         |
| S America (vs America) | No  | 0.53                      | 0.077       | 0.24                            | 0.73   | 0.64  | 0.54                 | 0.032  | 0.051  | 0.073              | 0.032               | -     | 0.12                 | $t_{10} = +2.71$             | 0.0075                                         | 0.0032                                         | <b>0.049</b>                     | 0.14         | No         | 0.0075                                         | 0.00         |
|                        | Yes | 0.13                      | 0.16        | 0.082                           | 0.20   | 0.49  | 0.04                 | 0.016  | 0.049  | 0.0052             | $7.6 \cdot 10^{-5}$ | -     | $6.8 \cdot 10^{-5}$  | $p = 0.022$                  | <b><math>1.20 \cdot 10^{-9}</math></b>         | $7.07 \cdot 10^{-10}$                          | $8.1 \cdot 10^{-17}$             | -0.10        | Yes        | <b><math>1.20 \cdot 10^{-9}</math></b>         | 0.00         |
| C America (vs world)   | No  | 0.25                      | 0.11        | 0.05                            | 0.41   | 0.37  | 0.31                 | 0.42   | 0.48   | 0.84               | 0.71                | -     | 0.94                 | $t_{10} = -4.15$             | 0.37                                           | 0.29                                           | <b>0.38</b>                      | 0.17         | No         | <b>0.38</b>                                    | 0.29         |
|                        | Yes | 0.65                      | 0.21        | 0.12                            | 0.65   | 0.47  | 0.31                 | 0.66   | 0.76   | 0.91               | 0.88                | -     | 0.96                 | $p = 0.002$                  | 0.86                                           | 0.86                                           | 0.73                             | 0.16         | No         | <b>0.90</b>                                    | 0.58         |
| C America (vs America) | No  | 0.78                      | 0.70        | 0.09                            | 0.60   | 0.80  | 0.47                 | 0.82   | 0.7    | 0.92               | 0.97                | -     | 0.94                 | $t_{10} = +2.07$             | 0.98                                           | <b>0.99</b>                                    | 0.88                             | 0.23         | No         | 0.73                                           | 0.58         |
|                        | Yes | 0.62                      | 0.78        | 0.11                            | 0.54   | 0.70  | 0.35                 | 0.80   | 0.70   | 0.95               | 0.79                | -     | 0.96                 | $p = 0.066$                  | <b>0.96</b>                                    | 0.95                                           | 0.79                             | 0.30         | No         | 0.67                                           | 0.64         |
| N America (vs world)   | No  | 0.012                     | 0.029       | 0.13                            | 0.0054 | 0.033 | 0.085                | 0.036  | 0.012  | 0.023              | 0.015               | 0.17  | 0.020                | $t_{11} = -2.25$             | $9.05 \cdot 10^{-9}$                           | $6.19 \cdot 10^{-11}$                          | <b>0.018</b>                     | 0.77         | Yes        | $9.05 \cdot 10^{-9}$                           | 0.00         |
|                        | Yes | 0.23                      | 0.071       | 0.088                           | 0.057  | 0.065 | 0.046                | 0.12   | 0.071  | 0.059              | 0.069               | 0.18  | 0.038                | $p = 0.046$                  | $4.59 \cdot 10^{-5}$                           | $6.83 \cdot 10^{-7}$                           | <b>0.072</b>                     | 0.91         | No         | 0.06                                           | 0.75         |
| N America (vs America) | No  | 0.15                      | 0.39        | 0.67                            | 0.05   | 0.21  | 0.44                 | 0.20   | 0.012  | 0.10               | 0.23                | 0.40  | 0.11                 | $t_{11} = +3.05$             | 0.0093                                         | 0.0017                                         | <b>0.12</b>                      | 0.47         | No         | 0.0093                                         | 0.00         |
|                        | Yes | 0.037                     | 0.55        | 0.53                            | 0.0038 | 0.034 | 0.084                | 0.087  | 0.0006 | 0.021              | 0.0001              | 0.28  | 0.0015               | $p = 0.011$                  | <b><math>4.61 \cdot 10^{-10}</math></b>        | $4.09 \cdot 10^{-10}$                          | $9.0 \cdot 10^{-17}$             | -0.09        | Yes        | <b><math>4.61 \cdot 10^{-10}</math></b>        | 0.00         |
| America + Siberia      | No  | 0.0001                    | -           | $0.0026$<br>$0.0061^{\ddagger}$ | -      | -     | $0.0070$<br>$0.0073$ | 0.0035 | -      | $0.021$<br>$0.031$ | 0.0001              | -     | $0.0056$<br>$0.0039$ | $t_6 = -1.808$<br>$p = 0.12$ | $8.72 \cdot 10^{-13}$<br>$1.96 \cdot 10^{-12}$ | $2.29 \cdot 10^{-14}$<br>$6.30 \cdot 10^{-14}$ | <b>0.00022</b><br><b>0.00017</b> | 0.59<br>0.53 | Yes<br>Yes | $8.72 \cdot 10^{-13}$<br>$1.96 \cdot 10^{-12}$ | 0.00         |
|                        | Yes | 0.17                      | -           | $0.0009$<br>$0.0017$            | -      | -     | $0.0015$<br>$0.0014$ | 0.059  | -      | 0.074<br>0.10      | 0.0049              | -     | $0.023$<br>$0.014$   | $t_6 = -1.78$<br>$p = 0.12$  | $1.47 \cdot 10^{-7}$<br>$1.81 \cdot 10^{-7}$   | $1.69 \cdot 10^{-8}$<br>$2.11 \cdot 10^{-8}$   | <b>0.00096</b><br><b>0.001</b>   | 0.33<br>0.33 | Yes<br>Yes | $1.47 \cdot 10^{-7}$<br>$1.81 \cdot 10^{-7}$   | 0.00         |
| S America + Siberia    | No  | 0.11                      | -           | $0.023$<br>$0.044$              | -      | -     | 0.07<br>0.095        | 0.34   | -      | $0.018$<br>$0.031$ | 0.11                | -     | $0.0038$<br>$0.0040$ | $t_6 = +0.99$<br>$p = 0.36$  | $8.24 \cdot 10^{-5}$<br>$0.00025$              | $1.29 \cdot 10^{-5}$<br>$3.93 \cdot 10^{-5}$   | <b>0.02</b><br><b>0.028</b>      | 0.47<br>0.53 | Yes<br>Yes | $8.24 \cdot 10^{-5}$<br>$0.00025$              | 0.00         |
|                        | Yes | 0.14                      | -           | $0.013$<br>$0.025$              | -      | -     | $0.043$<br>$0.054$   | 0.316  | -      | $0.032$<br>$0.057$ | 0.042               | -     | $0.0042$<br>$0.0043$ | $t_6 = +0.99$<br>$p = 0.36$  | $3.46 \cdot 10^{-5}$<br>$0.0001$               | $4.59 \cdot 10^{-6}$<br>$1.40 \cdot 10^{-5}$   | <b>0.014</b><br><b>0.023</b>     | 0.50<br>0.55 | Yes<br>Yes | $3.46 \cdot 10^{-5}$<br>$0.0001$               | 0.00         |
| C America + Siberia    | No  | 0.42                      | -           | 0.26<br>0.37                    | -      | -     | 0.45<br>0.46         | 0.29   | -      | 0.60<br>0.72       | 0.10                | -     | 0.59<br>0.45         | $t_6 = -1.51$<br>$p = 0.18$  | <b>0.37</b><br><b>0.41</b>                     | 0.19<br>0.22                                   | 0.35<br>0.37                     | 0.71<br>0.69 | No<br>No   | 0.35<br>0.37                                   | 0.66<br>0.67 |

† A combined p-value of exactly 0.00 is an artifact of combining very small randomization p-values (smaller than the lower limit given by the number of randomizations used here,  $10^{-4}$ ) and represents in fact an extremely small (but still greater than 0) p-value.

‡ For tests involving Siberia (N-E Eurasia), the first entry in the H cells represents Chukotko-Kamchatkan & Tungusic while the second entry represents Chukotko-Kamchatkan only; this extends to the combined p-value cells.

| Macro-area                  | Geo | P-values for each dataset |      |                |      |      |                |       |        |                      |             |       | Paired t-test   | Methods for combining p-values   |                            |                                  |                                               |                |            |                                                |              |
|-----------------------------|-----|---------------------------|------|----------------|------|------|----------------|-------|--------|----------------------|-------------|-------|-----------------|----------------------------------|----------------------------|----------------------------------|-----------------------------------------------|----------------|------------|------------------------------------------------|--------------|
|                             |     | BBE                       | BBW  | BBH            | BPE  | BPW  | BPH            | MBE   | MBW    | MBH                  | MPE         | MPW   |                 | MPH                              | F                          | Z                                | H                                             |                | S          | M                                              |              |
|                             |     |                           |      |                |      |      |                |       |        |                      |             |       |                 |                                  |                            |                                  | p                                             | r              |            | p                                              | r            |
|                             | Yes | 0.52                      | -    | 0.22<br>0.34   | -    | -    | 0.43<br>0.44   | 0.28  | -      | 0.71<br>0.81         | 0.11        | -     | 0.70<br>0.56    | $t_6 = -1.44$<br>$p = 0.20$      | <b>0.42</b><br><b>0.47</b> | 0.27<br>0.31                     | 0.38<br>0.41                                  | 0.55<br>0.56   | No<br>No   | 0.38<br>0.40                                   | 0.58<br>0.62 |
| N America + Siberia         | No  | 0.22                      | -    | 0.083<br>0.13  | -    | -    | 0.075<br>0.052 | 0.078 | -      | 0.033<br>0.030       | $< 10^{-4}$ | -     | 0.02<br>0.0034  | $t_6 = -1.15$<br>$p = 0.30$      | 0.00<br>0.00               | 0.00<br>0.00                     | <b>0.00039</b><br><b>3.31•10<sup>-6</sup></b> | 0.12<br>-0.02  | Yes<br>Yes | 3.72•10 <sup>-6</sup><br>8.64•10 <sup>-7</sup> | 0.00<br>0.00 |
|                             | Yes | 0.54                      | -    | 0.049<br>0.096 | -    | -    | 0.039<br>0.029 | 0.11  | -      | 0.073<br>0.080       | 0.019       | -     | 0.043<br>0.0063 | $t_6 = -1.17$<br>$p = 0.28$      | 0.00062<br>0.00022         | 0.00012<br>5.18•10 <sup>-5</sup> | <b>0.034</b><br><b>0.013</b>                  | 0.49<br>0.31   | No<br>Yes  | 0.00062<br>0.00022                             | 0.00<br>0.00 |
| Core Eurasia                | No  | 0.48                      | 0.64 | 0.42           | 0.62 | 0.72 | 0.77           | 0.178 | 0.0083 | 9.9•10 <sup>-5</sup> | 0.24        | 0.056 | 0.0026          | $t_{11} = -3.09$<br>$p = 0.01$   | 0.00011<br>0.0039          | <b>0.0013</b><br><b>0.094</b>    | 2.84•10 <sup>-5</sup><br>0.039                | -0.09<br>-0.09 | Yes<br>Yes | 0.00011<br>0.0039                              | 0.00<br>0.00 |
|                             | Yes | 0.89                      | 0.91 | 0.45           | 0.90 | 0.84 | 0.77           | 0.34  | 0.039  | 0.0003               | 0.44        | 0.047 | 0.0052          |                                  |                            |                                  |                                               |                |            |                                                |              |
| Nostratic v1                | No  | 0.53                      | 0.59 | 0.64           | 0.77 | 0.52 | 0.87           | 0.30  | 0.035  | 0.002                | 0.15        | 0.066 | 0.0025          | $t_{11} = -3.45$<br>$p = 0.0054$ | 0.0025<br>0.025            | <b>0.011</b><br><b>0.13</b>      | 0.001<br>0.069                                | -0.09<br>-0.09 | Yes<br>Yes | 0.0025<br>0.025                                | 0.00<br>0.00 |
|                             | Yes | 0.79                      | 0.83 | 0.67           | 0.92 | 0.61 | 0.87           | 0.46  | 0.10   | 0.004                | 0.25        | 0.07  | 0.004           |                                  |                            |                                  |                                               |                |            |                                                |              |
| Nostratic v2                | No  | 0.76                      | 0.75 | 0.74           | 0.84 | 0.67 | 0.82           | 0.36  | 0.07   | 0.093                | 0.22        | 0.037 | 0.13            | $t_{11} = -5.08$<br>$p = 0.0004$ | 0.21<br>0.50               | <b>0.24</b><br><b>0.77</b>       | 0.17<br>-0.09                                 | -0.09<br>-0.09 | No<br>No   | 0.21<br>0.50                                   | 0.00<br>0.00 |
|                             | Yes | 0.95                      | 0.91 | 0.79           | 0.96 | 0.76 | 0.83           | 0.50  | 0.16   | 0.14                 | 0.33        | 0.033 | 0.17            |                                  |                            |                                  |                                               |                |            |                                                |              |
| Eurasia                     | No  | 0.73                      | 0.93 | 0.43           | 0.62 | 0.67 | 0.76           | 0.41  | 0.026  | 0.0002               | 0.38        | 0.19  | 0.0029          | $t_{11} = -2.82$<br>$p = 0.017$  | 0.0027<br>0.045            | <b>0.036</b><br><b>0.70</b>      | 0.0077<br>-0.09                               | -0.09<br>-0.09 | Yes<br>Yes | 0.0027<br>0.0451                               | 0.00<br>0.00 |
|                             | Yes | 0.99                      | 0.99 | 0.44           | 0.93 | 0.82 | 0.72           | 0.71  | 0.17   | 0.001                | 0.70        | 0.12  | 0.0043          |                                  |                            |                                  |                                               |                |            |                                                |              |
| PNG                         | No  | 0.64                      | -    | 0.72           | -    | -    | 0.82           | 0.017 | -      | 0.012                | 0.19        | -     | 0.12            | $t_6 = -2.14$<br>$p = 0.076$     | 0.023<br>0.11              | <b>0.042</b><br><b>0.22</b>      | 0.0056<br>0.13                                | -0.17<br>-0.17 | No<br>No   | 0.023<br>0.11                                  | 0.00<br>0.00 |
|                             | Yes | 0.93                      | -    | 0.76           | -    | -    | 0.83           | 0.038 | -      | 0.027                | 0.292       | -     | 0.19            |                                  |                            |                                  |                                               |                |            |                                                |              |
| PNG + Australia             | No  | 0.88                      | 0.84 | 0.62           | 0.58 | 0.82 | 0.77           | 0.26  | 0.65   | 0.10                 | 0.67        | 0.78  | 0.17            | $t_{11} = -5.82$<br>$p = 0.0001$ | <b>0.87</b><br><b>0.99</b> | 0.81<br><b>0.99</b>              | 0.65<br>0.89                                  | 0.37<br>0.23   | No<br>No   | 0.59<br>0.69                                   | 0.55<br>0.79 |
|                             | Yes | 0.99                      | 0.94 | 0.68           | 0.71 | 0.88 | 0.77           | 0.50  | 0.81   | 0.20                 | 0.83        | 0.82  | 0.30            |                                  |                            |                                  |                                               |                |            |                                                |              |
| Austro-Tai                  | No  | 0.20                      | -    | 0.078          | -    | -    | 0.27           | 0.08  | -      | 0.24                 | 0.031       | -     | 0.022           | $t_6 = -2.82$<br>$p = 0.030$     | 0.0025<br>0.018            | 0.00041<br>0.0041                | <b>0.070</b><br><b>0.12</b>                   | 0.69<br>0.68   | No<br>No   | 0.0027<br>0.063                                | 0.00<br>0.22 |
|                             | Yes | 0.36                      | -    | 0.14           | -    | -    | 0.27           | 0.15  | -      | 0.32                 | 0.049       | -     | 0.037           |                                  |                            |                                  |                                               |                |            |                                                |              |
| South-East Asia and Oceania | No  | 0.39                      | 0.58 | 0.38           | 0.68 | 0.34 | 0.19           | 0.55  | 0.39   | 0.59                 | 0.29        | 0.34  | 0.15            | $t_{11} = -4.47$<br>$p = 0.0009$ | <b>0.48</b><br><b>0.83</b> | 0.18<br>0.64                     | 0.39<br>0.55                                  | 0.79<br>0.61   | No<br>No   | 0.39<br>0.52                                   | 0.82<br>0.77 |
|                             | Yes | 0.74                      | 0.75 | 0.39           | 0.84 | 0.42 | 0.19           | 0.75  | 0.59   | 0.73                 | 0.46        | 0.38  | 0.20            |                                  |                            |                                  |                                               |                |            |                                                |              |
| Australia                   | No  | -                         | -    | 0.65           | -    | -    | 0.45           | -     | -      | 0.22                 | -           | -     | 0.28            | $t_3 = -0.62$<br>$p = 0.58$      | <b>0.42</b><br><b>0.51</b> | 0.29<br>0.34                     | 0.38<br>0.42                                  | 0.72<br>0.88   | No<br>No   | 0.38<br>0.41                                   | 0.79<br>0.92 |
|                             | Yes | -                         | -    | 0.61           | -    | -    | 0.42           | -     | -      | 0.30                 | -           | -     | 0.36            |                                  |                            |                                  |                                               |                |            |                                                |              |

**Table S16:** Statistical robustness of sets of language families. Actual p-values for each of the datasets and the combined p-values using the five methods (Fisher, Z-transform, Hartung, Simes and Makambi) applied to all datasets for raw (Geo is “No”) and geography-corrected (Geo is “Yes”) stability distances. Also showing the paired t-tests between the raw and geography-corrected p-values (bold=significant t-test, italic=positive t-test). For S we show if H<sub>0</sub> was rejected (“Yes” or “No”) for α=0.05. For H and M the estimated inter-datasets correlations are also shown. The most conservative combined p-value among the methods is in bold. Significant p-values at α=0.05 are in italic. See Table S15 for the actual composition of the sets of families.



| Method                  | R implementation                                                                                                                                                                                                                                                                                                                                                                                                                                                                                                                                                                                                                                                                                                                                                                                                                                                                                                                                                                                                                                                                                                              |
|-------------------------|-------------------------------------------------------------------------------------------------------------------------------------------------------------------------------------------------------------------------------------------------------------------------------------------------------------------------------------------------------------------------------------------------------------------------------------------------------------------------------------------------------------------------------------------------------------------------------------------------------------------------------------------------------------------------------------------------------------------------------------------------------------------------------------------------------------------------------------------------------------------------------------------------------------------------------------------------------------------------------------------------------------------------------------------------------------------------------------------------------------------------------|
| <b>Fisher</b> [30]      | <pre>library(survcomp) combine.test( ..., method="fisher" )</pre>                                                                                                                                                                                                                                                                                                                                                                                                                                                                                                                                                                                                                                                                                                                                                                                                                                                                                                                                                                                                                                                             |
| <b>Z-transform</b> [31] | <pre>library(survcomp) combine.test( ..., method="z.transform" )</pre>                                                                                                                                                                                                                                                                                                                                                                                                                                                                                                                                                                                                                                                                                                                                                                                                                                                                                                                                                                                                                                                        |
| <b>Hartung</b> [52]     | <pre># Hartung 1999: assumes constant correlation across tests: hartung.1999 &lt;- function( pi, lowest.p=10^-16 ) {   # The number of tests:   N &lt;- length(pi);    # Truncate the smallest p-values to the lowest possible (to avoid qnorm(0) basically):   pi &lt;- pmax( pi, rep(lowest.p,N) );    # Compute the probits <math>t_{\{i\}} = \phi^{-1}(p_{\{i\}})</math>, where <math>\phi(.)</math> = standard normal cumulative distribution function (probit) =   qnorm(.) in R:   ti &lt;- qnorm( pi );    # The mean of <math>t_{\{i\}}</math>:   t.mean &lt;- mean(ti, na.rm=TRUE );    # rho_hat:   rho.hat &lt;- 1 - (1/(N-1)) * sum((ti - t.mean)^2);    # the rho estimate:   rho.star.hat &lt;- max( -(1/(N-1)), rho.hat );    # correction factor kappa:   kappa &lt;- 0.1 * (1 + 1/(N-1) - rho.star.hat);    # the modified inverse normal test statistics:   Zm &lt;- sum(ti) / sqrt(N + N*(N-1)*(rho.star.hat + kappa*sqrt(2/(N+1))*(1-rho.star.hat)));    # Zm should be distributed as N(0,1):   p.val &lt;- pnorm(Zm);    # Return value:   list( "p.value"=p.val, "estim.corr"=rho.star.hat ); }</pre> |
| <b>Makambi</b> [53]     | <pre># Makambi 2003: extension of Fisher's method for positively correlated dependent cases and assumed homogeneity of correlations # the weights must sum up to 1 and could reflect sample size for the tests (by default they are all equal to 1/N): makambi.2003 &lt;- function( pi, alpha=0.05, weights=rep(1/length(pi),length(pi)), lowest.p=10^-16 ) {   # The number of tests:</pre>                                                                                                                                                                                                                                                                                                                                                                                                                                                                                                                                                                                                                                                                                                                                  |

| Method | R implementation                                                                                                                                                                                                                                                                                                                                                                                                                                                                                                                                                                                                                                                                                                                                                                                                                                                                                                                                                                                                                                                                                                                                                                                                                                                                                                                                                                                                                         |
|--------|------------------------------------------------------------------------------------------------------------------------------------------------------------------------------------------------------------------------------------------------------------------------------------------------------------------------------------------------------------------------------------------------------------------------------------------------------------------------------------------------------------------------------------------------------------------------------------------------------------------------------------------------------------------------------------------------------------------------------------------------------------------------------------------------------------------------------------------------------------------------------------------------------------------------------------------------------------------------------------------------------------------------------------------------------------------------------------------------------------------------------------------------------------------------------------------------------------------------------------------------------------------------------------------------------------------------------------------------------------------------------------------------------------------------------------------|
|        | <pre> N &lt;- length(pi);  # Truncate the smallest p-values to the lowest possible (to avoid log(0) basically): pi &lt;- pmax( pi, rep(lowest.p,N) );  # Estimate the positive homogenous correlation among tests, rho.hat:  # compute si: si &lt;- -2*log(pi); # and their average s.bar: s.bar &lt;- mean(si,na.rm=TRUE);  # the quadratic form qt: qt &lt;- sum( (si-s.bar)^2 ) / (N-1); if( 4*qt/3 &lt; 10.028 ) {   # rho.hat:   rho.hat &lt;- -2.167 + sqrt(10.028 - 4*qt/3);    # the estimated positive homogenous correlation among tests rho.hat.star:   rho.hat.star &lt;- max( rho.hat, 0 ); } else {   rho.hat.star &lt;- 0; }  # Compute MF, the weighted Fisher's statistic: MF &lt;- sum( -2*weights*log(pi) );  # The estimated variance of MF: var.MF &lt;- 4*sum(weights^2) + sum( as.numeric( sapply( 1:N, function(i){ sapply( 1:N, function(j){ ifelse( i != j, weights[i]*weights[j]*(3.25*rho.hat.star + 0.75*rho.hat.star^2), 0 ) } ) } ) ), na.rm=TRUE );  # And the estimated degrees of freedom of the chi-square test, nu.hat: nu.hat &lt;- 8/var.MF;  # Reject the null? reject.null &lt;- ( MF &gt; 2*qchisq( 1-alpha, nu.hat )/nu.hat );  # and the associated p-value: p.value &lt;- 1 - pchisq( nu.hat * MF / 2, nu.hat );  ## Print the results: #cat( "MF=", MF, " distributed as 2*chisq(df=", nu.hat, ")/", nu.hat, " rejects the null ", reject.null, " with p=", p.value, "\n", sep="" ); </pre> |

| Method            | R implementation                                                                                                                                                                                                                                                                                                                                                                                                                                     |
|-------------------|------------------------------------------------------------------------------------------------------------------------------------------------------------------------------------------------------------------------------------------------------------------------------------------------------------------------------------------------------------------------------------------------------------------------------------------------------|
|                   | <pre># Return value: list( "p.value"=p.value, "estim.corr"=rho.hat.star ); }</pre>                                                                                                                                                                                                                                                                                                                                                                   |
| <b>Simes [54]</b> | <pre># Simes 1986: robust to dependence but the resulting p-value cannot be smaller than the minimum p-value inputted: simes.1986 &lt;- function( pi, alpha=0.05 ) {   # The number of tests:   N &lt;- length(pi);    # Sort the p-values:   pi.sorted &lt;- sort( pi );    # Check the rejection criterion:   pi.reject &lt;- (pi.sorted &lt; (1:N)*alpha/N);    # If just one is true, then reject the null:   (sum( pi.reject ) &gt; 0); }</pre> |

**Table S17:** The R [47] code implementing the methods for combining p-values used here. **Fisher** [30] and **Z-Transform** [31] are implemented by function `combine.test` in library `survcomp`. **Hartung** [52], **Makambi** [53] and **Simes** [54] were implemented by the first author in R from descriptions in the primary literature and are released under GLPv3.

| Family                  | MBE         |             | MPE         |                   | MBH         |             | MPH               |             | BBE         |             | BPE         |             | BBH         |             | BPH         |             |
|-------------------------|-------------|-------------|-------------|-------------------|-------------|-------------|-------------------|-------------|-------------|-------------|-------------|-------------|-------------|-------------|-------------|-------------|
|                         | <i>r</i>    | $\rho$      | <i>r</i>    | $\rho$            | <i>r</i>    | $\rho$      | <i>r</i>          | $\rho$      | <i>r</i>    | $\rho$      | <i>r</i>    | $\rho$      | <i>r</i>    | $\rho$      | <i>r</i>    | $\rho$      |
| <b>All</b>              | <b>0.78</b> | <b>0.72</b> | <b>0.65</b> | <b>0.62</b>       | <b>0.80</b> | <b>0.78</b> | <b>0.74</b>       | <b>0.67</b> | <b>0.74</b> | <b>0.70</b> | <b>0.79</b> | <b>0.70</b> | <b>0.77</b> | <b>0.75</b> | <b>0.77</b> | <b>0.76</b> |
| Afro-Asiatic            | 0.53        | 0.54        | 0.63        | 0.66              | 0.50        | 0.50        | 0.55              | 0.55        | 0.31        | 0.19        | 0.23        | -0.03       | 0.05        | -0.07       | 0.41        | 0.38        |
| Algie                   | 0.34        | 0.35        | 0.03        | 0.03              | 0.52        | 0.50        | 0.40              | 0.40        | 0.52        | 0.55        | 0.52        | 0.52        | 0.79        | 0.80        | 0.77        | 0.80        |
| Altaic                  | 0.45        | 0.48        | 0.40        | 0.44              | -           | -           | -                 | -           | 0.42        | 0.56        | 0.43        | 0.64        | -           | -           | -           | -           |
| Arawakan                | 0.64        | 0.68        | 0.59        | 0.60              | 0.77        | 0.79        | 0.79              | 0.81        | -           | -           | -           | -           | 0.41        | 0.32        | 0.30        | 0.35        |
| Athapaskan-Eyak-Tlingit | -           | -           | -           | -                 | 0.30        | 0.31        | 0.49              | 0.48        | -           | -           | -           | -           | 0.66        | 0.70        | 0.70        | 0.69        |
| Atlantic-Congo          | -           | -           | -           | -                 | 0.58        | 0.60        | 0.40              | 0.44        | -           | -           | -           | -           | 0.53        | 0.51        | 0.64        | 0.67        |
| Australian              | 0.58        | 0.59        | 0.67        | 0.67              | -           | -           | -                 | -           | 0.22        | 0.24        | 0.28        | 0.32        | -           | -           | -           | -           |
| Austro-Asiatic          | 0.58        | 0.59        | 0.55        | 0.57              | 0.73        | 0.72        | 0.58              | 0.57        | -0.06       | 0.11        | 0.08        | 0.09        | 0.26        | 0.27        | 0.24        | 0.28        |
| Austronesian            | 0.86        | 0.88        | 0.81        | 0.81              | 0.78        | 0.78        | 0.81              | 0.82        | 0.84        | 0.87        | 0.83        | 0.85        | 0.74        | 0.77        | 0.73        | 0.79        |
| Cariban                 | -0.06       | 0.08        | -0.09       | 0.12              | 0.24        | 0.26        | 0.09              | 0.17        | 0.76        | 0.75        | -           | -           | 0.75        | 0.82        | 0.62        | 0.63        |
| Central Sudanic         | -           | -           | -           | -                 | 0.20        | 0.24        | 0.27              | 0.27        | -           | -           | -           | -           | 0.62        | 0.62        | 0.61        | 0.59        |
| Chibchan                | 0.56        | 0.58        | 0.47        | 0.50              | 0.55        | 0.58        | 0.59              | 0.61        | -           | -           | -           | -           | 0.76        | 0.73        | 0.78        | 0.62        |
| Chukotko-Kamchatkan     | -0.06       | -0.02       | -0.29       | -0.29             | -0.25       | -0.22       | -0.39             | -0.40       | 0.47        | 0.48        |             |             |             |             |             |             |
| Cochimi-Yuman           | -           | -           | -           | -                 | -0.18       | -0.06       | -0.16             | -0.04       | -           | -           | -           | -           | -           | -           | -           | -           |
| Dravidian               | 0.09        | 0.16        | 0.41        | 0.45              | 0.41        | 0.44        | 0.38              | 0.42        | -0.13       | -0.29       | 0.70        | 0.71        | 0.58        | 0.49        | 0.76        | 0.71        |
| Eskimo-Aleut            | -           | -           | 0.27        | 0.28              | -0.04       | 0.02        | 0.00 <sup>†</sup> | 0.05        | -           | -           | 0.16        | 0.13        | 0.50        | 0.50        | 0.50        | 0.50        |
| Gunwinyguan             | -           | -           | -           | -                 | 0.32        | 0.33        | 0.40              | 0.41        | -           | -           | -           | -           | -           | -           | -           | -           |
| Hokan                   | 0.51        | 0.54        | 0.32        | 0.34              | -           | -           | -                 | -           | -0.12       | -0.15       | -0.24       | -0.27       | -           | -           | -           | -           |
| Indo-European           | 0.70        | 0.72        | 0.71        | 0.72              | 0.74        | 0.73        | 0.69              | 0.70        | 0.42        | 0.47        | 0.80        | 0.73        | 0.59        | 0.69        | 0.63        | 0.71        |
| Iroquoian               | -           | -           | 0.51        | 0.52              | 0.57        | 0.60        | 0.62              | 0.64        | 0.68        | 0.72        | -           | -           | 0.75        | 0.73        | 0.80        | 0.78        |
| Je-Jabuti               | -           | -           | -           | -                 | -0.29       | -0.15       | -0.36             | -0.18       | -           | -           | -           | -           | 0.48        | 0.49        | 0.40        | 0.41        |
| Khoisan                 | 0.22        | 0.23        | 0.33        | 0.32              | -           | -           | -                 | -           | 0.40        | 0.41        | 0.03        | 0.02        | -           | -           | -           | -           |
| Macro-Ge                | 0.10        | 0.18        | -0.08       | 0.00 <sup>†</sup> | -           | -           | -                 | -           | 0.71        | 0.75        | 0.55        | 0.57        | -           | -           | -           | -           |
| Mande                   | -           | -           | -           | -                 | 0.04        | 0.17        | -0.03             | 0.12        | -           | -           | -           | -           | 0.58        | 0.56        | 0.36        | 0.40        |
| Mayan                   | 0.22        | 0.26        | -0.03       | 0.06              | 0.13        | 0.15        | -0.07             | -0.02       | 0.53        | 0.55        | -           | -           | 0.66        | 0.66        | 0.74        | 0.77        |
| Mongolic                | -           | -           | -           | -                 | 0.44        | 0.54        | 0.37              | 0.48        | -           | -           | -           | -           | 0.49        | 0.52        | 0.52        | 0.55        |

| Family            | MBE      |        | MPE      |        | MBH      |        | MPH      |        | BBE               |        | BPE      |        | BBH      |        | BPH      |        |
|-------------------|----------|--------|----------|--------|----------|--------|----------|--------|-------------------|--------|----------|--------|----------|--------|----------|--------|
|                   | <i>r</i> | $\rho$ | <i>r</i> | $\rho$ | <i>r</i> | $\rho$ | <i>r</i> | $\rho$ | <i>r</i>          | $\rho$ | <i>r</i> | $\rho$ | <i>r</i> | $\rho$ | <i>r</i> | $\rho$ |
| Muskogean         | -        | -      | -        | -      | -        | -      | -0.32    | -0.09  | -                 | -      | -        | -      | -        | -      | -        | -      |
| Na-Dene           | 0.37     | 0.41   | 0.52     | 0.53   | -        | -      | -        | -      | 0.72              | 0.76   | 0.66     | 0.74   | -        | -      | -        | -      |
| Nakh-Daghestanian | -        | -      | -        | -      | -0.30    | -0.01  | -0.27    | 0.06   | -                 | -      | -        | -      | 0.36     | 0.33   | 0.46     | 0.46   |
| Niger-Congo       | 0.59     | 0.59   | 0.50     | 0.45   | -        | -      | -        | -      | 0.47              | 0.44   | 0.72     | 0.67   | -        | -      | -        | -      |
| Nilo-Saharan      | 0.65     | 0.67   | 0.61     | 0.63   | -        | -      | -        | -      | 0.75              | 0.77   | 0.81     | 0.85   | -        | -      | -        | -      |
| Nilotic           | -        | -      | -        | -      | 0.33     | 0.37   | 0.25     | 0.31   | -                 | -      | -        | -      | 0.29     | 0.31   | 0.38     | 0.44   |
| North Caucasian   | 0.00     | 0.22   | 0.08     | 0.17   | -        | -      | -        | -      | -0.02             | -0.01  | -0.44    | -0.42  | -        | -      | -        | -      |
| North Halmahera   | -        | -      | -        | -      | -0.09    | 0.03   | -0.28    | -0.07  | -                 | -      | -        | -      | 0.71     | 0.79   | 0.72     | 0.79   |
| Oto-Manguean      | 0.56     | 0.57   | 0.25     | 0.30   | 0.20     | 0.27   | 0.06     | 0.22   | 0.64              | 0.66   | 0.71     | 0.75   | 0.53     | 0.58   | 0.33     | 0.37   |
| Pama-Nyungan      | -        | -      | -        | -      | 0.63     | 0.65   | 0.60     | 0.61   | -                 | -      | -        | -      | 0.66     | 0.56   | 0.60     | 0.45   |
| Panoan            | -        | -      | -        | -      | 0.09     | 0.10   | -0.09    | -0.04  | -                 | -      | -        | -      | 0.47     | 0.46   | 0.42     | 0.42   |
| Penutian          | 0.67     | 0.70   | 0.71     | 0.72   | -        | -      | -        | -      | 0.47              | -0.03  | -0.18    | -0.29  | -        | -      | -        | -      |
| Salishan          | -0.34    | -0.13  | -0.20    | -0.02  | -0.25    | 0.01   | -0.21    | -0.06  | 0.25              | 0.26   | -        | -      | 0.39     | 0.36   | 0.60     | 0.57   |
| Sepik             | 0.26     | 0.27   | -0.01    | 0.06   | 0.29     | 0.27   | 0.22     | 0.25   | -0.20             | -0.07  | -        | -      | 0.40     | 0.40   | 0.19     | 0.20   |
| Sino-Tibetan      | 0.53     | 0.57   | 0.40     | 0.46   | 0.67     | 0.69   | 0.68     | 0.69   | 0.55              | 0.52   | 0.51     | 0.49   | 0.73     | 0.69   | 0.53     | 0.47   |
| Tacanan           | -        | -      | -        | -      | -        | -      | -        | -      | 0.31              | 0.30   | -        | -      | -        | -      | -        | -      |
| Tai-Kadai         | -0.30    | -0.13  | -0.38    | -0.12  | -0.02    | 0.15   | -0.29    | -0.03  | 0.36              | 0.36   | -        | -      | 0.08     | 0.10   | 0.32     | 0.32   |
| Trans-New Guinea  | 0.66     | 0.68   | 0.66     | 0.68   | 0.73     | 0.74   | 0.78     | 0.79   | 0.48              | 0.44   | 0.15     | 0.26   | 0.44     | 0.44   | 0.46     | 0.47   |
| Tucanoan          | -0.20    | -0.09  | 0.12     | 0.18   | 0.20     | 0.23   | 0.38     | 0.41   | 0.64              | 0.68   | -        | -      | 0.67     | 0.69   | 0.65     | 0.68   |
| Tungusic          | -        | -      | -        | -      | 0.05     | 0.14   | 0.11     | 0.22   | -                 | -      | -        | -      | 0.50     | 0.45   | 0.44     | 0.41   |
| Tupian            | 0.28     | 0.32   | -0.02    | 0.09   | 0.36     | 0.35   | -0.18    | -0.16  | -                 | -      | -        | -      | 0.31     | 0.31   | 0.30     | 0.30   |
| Turkic            | -        | -      | -        | -      | 0.57     | 0.59   | 0.26     | 0.42   | -                 | -      | -        | -      | 0.69     | 0.64   | 0.70     | 0.65   |
| Uralic            | 0.50     | 0.50   | 0.19     | 0.23   | 0.63     | 0.66   | 0.63     | 0.65   | 0.00 <sup>†</sup> | -0.04  | -0.01    | -0.01  | 0.36     | 0.35   | 0.07     | 0.05   |
| Uto-Aztecan       | 0.33     | 0.38   | 0.25     | 0.28   | 0.55     | 0.58   | 0.57     | 0.58   | 0.62              | 0.64   | 0.51     | 0.51   | 0.60     | 0.62   | 0.61     | 0.58   |
| Wakashan          | -0.39    | -0.32  | -0.66    | -0.54  | -        | -      | -        | -      | -                 | -      | -        | -      | -        | -      | -        | -      |
| West Papuan       | -0.08    | -0.02  | -        | -      | -        | -      | -        | -      | -                 | -      | -        | -      | -        | -      | -        | -      |

Table S18: The correlations between branch length and number of nodes for all language families amalgamated (first line) and each family separately for each of the 8

*datasets containing the family. Both Pearson's  $r$  and Spearman's  $\rho$  are given and the vast majority is very highly significant due to the very large number of observations in the posterior distribution, except for those marked with † which are non-significant at an  $\alpha$ -level of 0.05. We considered for this test only the datasets using the Ethnologue and Harald Hammarstöm's classifications given that they have an unconstrained number of levels.*

| Category           | MBH            |              | MPH            |              | BBH            |              | BPH            |              |
|--------------------|----------------|--------------|----------------|--------------|----------------|--------------|----------------|--------------|
|                    | <i>mean(r)</i> | <i>sd(r)</i> | <i>mean(r)</i> | <i>sd(r)</i> | <i>mean(r)</i> | <i>sd(r)</i> | <i>mean(r)</i> | <i>sd(r)</i> |
| <b>N=1</b>         |                |              |                |              |                |              |                |              |
| Nominal Categories | <b>0.54</b>    | 0.23         | <b>0.51</b>    | 0.26         | <b>0.56</b>    | 0.15         | <b>0.63</b>    | 0.16         |
| Verbal Categories  | <b>0.56</b>    | 0.15         | <b>0.58</b>    | 0.17         | <b>0.52</b>    | 0.16         | <b>0.59</b>    | 0.15         |
| Simple Clauses     | <b>0.52</b>    | 0.21         | <b>0.50</b>    | 0.23         | <b>0.45</b>    | 0.18         | <b>0.59</b>    | 0.18         |
| Nominal Syntax     | <b>0.56</b>    | 0.16         | <b>0.54</b>    | 0.17         | <b>0.42</b>    | 0.15         | <b>0.42</b>    | 0.17         |
| Morphology         | <b>0.54</b>    | 0.17         | <b>0.54</b>    | 0.16         | <b>0.45</b>    | 0.18         | <b>0.41</b>    | 0.17         |
| Phonology          | <b>0.40</b>    | 0.31         | <b>0.42</b>    | 0.30         | <b>0.47</b>    | 0.18         | <b>0.45</b>    | 0.18         |
| Word Order         | <b>0.41</b>    | 0.32         | <b>0.38</b>    | 0.34         | <b>0.37</b>    | 0.23         | <b>0.40</b>    | 0.24         |
| <b>N=5</b>         |                |              |                |              |                |              |                |              |
| NominalCategories  | <b>0.58</b>    | 0.19         | <b>0.58</b>    | 0.19         | <b>0.57</b>    | 0.16         | <b>0.62</b>    | 0.17         |
| SimpleClauses      | <b>0.56</b>    | 0.19         | <b>0.56</b>    | 0.20         | <b>0.47</b>    | 0.18         | <b>0.62</b>    | 0.17         |
| WordOrder          | <b>0.58</b>    | 0.25         | <b>0.55</b>    | 0.28         | <b>0.35</b>    | 0.25         | <b>0.39</b>    | 0.24         |
| VerbalCategories   | <b>0.56</b>    | 0.15         | <b>0.58</b>    | 0.17         | <b>0.52</b>    | 0.16         | <b>0.59</b>    | 0.15         |
| NominalSyntax      | <b>0.61</b>    | 0.14         | <b>0.59</b>    | 0.14         | <b>0.44</b>    | 0.16         | <b>0.42</b>    | 0.18         |
| Morphology         | <b>0.56</b>    | 0.17         | <b>0.57</b>    | 0.15         | <b>0.45</b>    | 0.18         | <b>0.40</b>    | 0.18         |
| Phonology          | <b>0.45</b>    | 0.30         | <b>0.48</b>    | 0.28         | <b>0.46</b>    | 0.19         | <b>0.44</b>    | 0.19         |
| <b>N=7</b>         |                |              |                |              |                |              |                |              |
| SimpleClauses      | <b>0.59</b>    | 0.17         | <b>0.64</b>    | 0.12         | <b>0.47</b>    | 0.18         | <b>0.60</b>    | 0.18         |
| NominalCategories  | <b>0.63</b>    | 0.13         | <b>0.59</b>    | 0.18         | <b>0.56</b>    | 0.16         | <b>0.62</b>    | 0.17         |
| WordOrder          | <b>0.67</b>    | 0.15         | <b>0.65</b>    | 0.17         | <b>0.35</b>    | 0.23         | <b>0.39</b>    | 0.26         |
| NominalSyntax      | <b>0.65</b>    | 0.11         | <b>0.62</b>    | 0.13         | <b>0.44</b>    | 0.16         | <b>0.42</b>    | 0.19         |
| VerbalCategories   | <b>0.57</b>    | 0.15         | <b>0.58</b>    | 0.17         | <b>0.51</b>    | 0.15         | <b>0.59</b>    | 0.15         |
| Phonology          | <b>0.57</b>    | 0.21         | <b>0.58</b>    | 0.20         | <b>0.46</b>    | 0.19         | <b>0.43</b>    | 0.20         |
| Morphology         | <b>0.57</b>    | 0.16         | <b>0.58</b>    | 0.16         | <b>0.45</b>    | 0.18         | <b>0.44</b>    | 0.16         |

**Table S19:** The correlations between branch length and number of nodes for all types of categories separately for each of the 4 datasets considered. Reported are the mean and standard deviation of Pearson's *r* across language families and outgroups. We considered for this test only the datasets using Harald Hammarstöm's classification given the computational cost. *N*=1 considers all families, while *N*=5 and *N*=7 only those with data for at least 5 or for all 7 categories.

Correlation between branch length and number of nodes across datasets

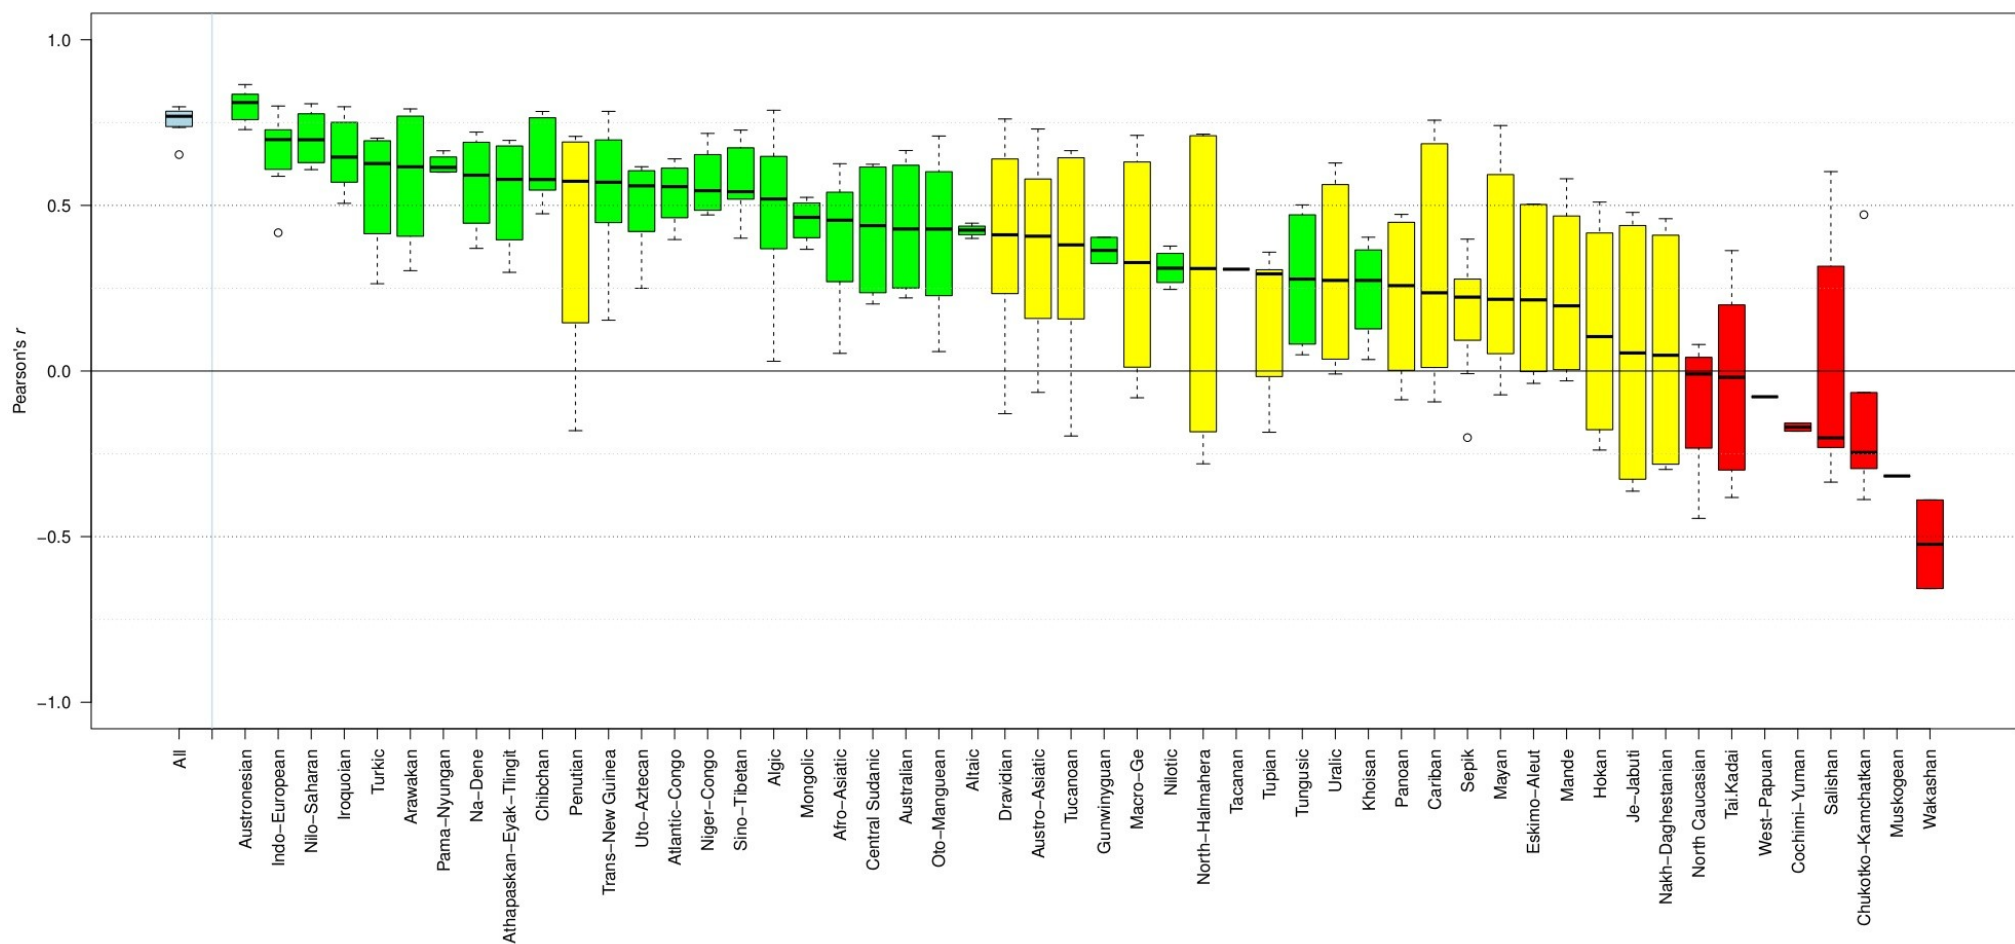

**Figure S15:** Correlation between branch length and number of nodes for all families together (leftmost) and for each family individually. The boxplots summarize the Pearson's  $r$  across the 8 datasets, red means the median  $r$  is below 0, yellow that the minimum  $r$  is below 0.



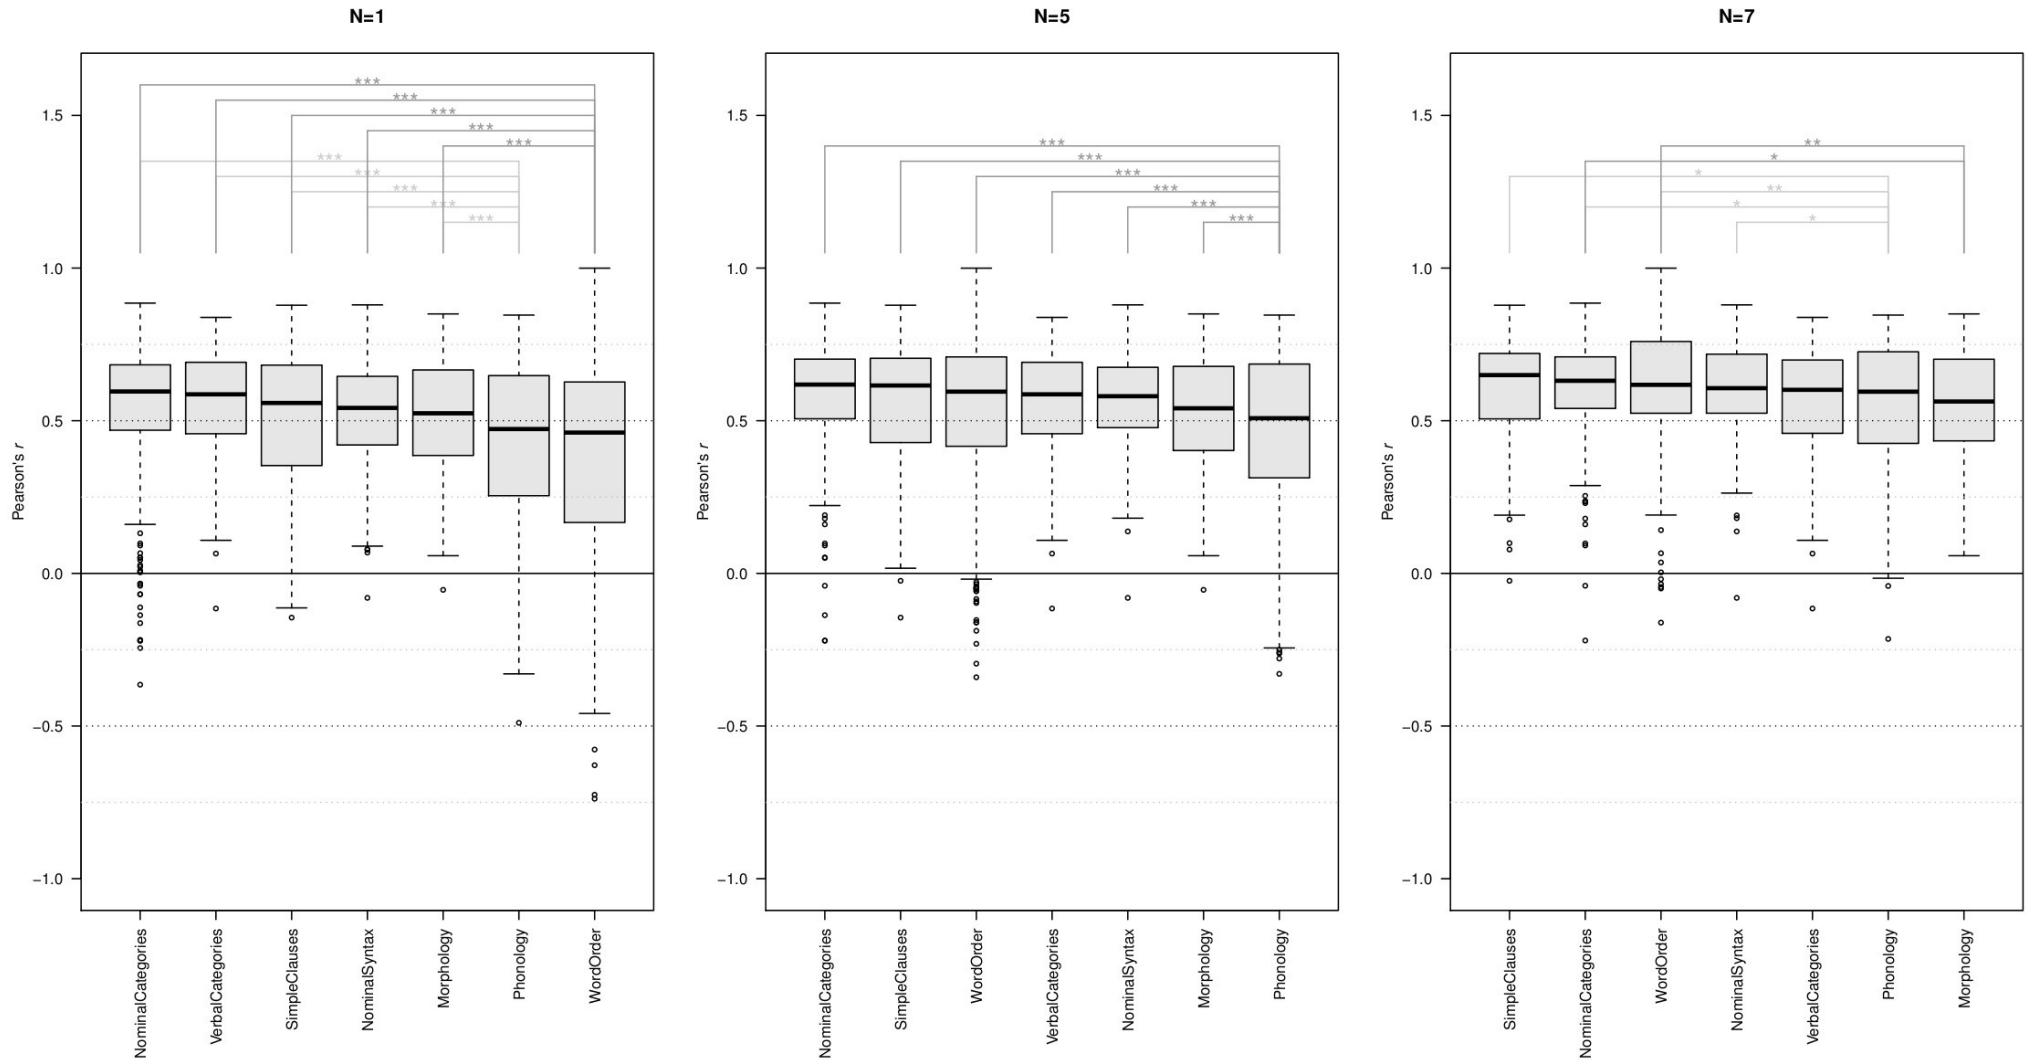

**Figure S16:** Boxplots of the correlation (Pearson's  $r$ ) between branch length and number of nodes for each category across 4 datasets (MBH, MPH, BBH and BPH) and all outgroups. The categories are ordered from highest median correlation (left) to the lowest (right) Shown are the boxplots for all families with data for at least one ( $N=1$ ), five ( $N=5$ ) or all ( $N=7$ ) categories of features. Shown are also the significant pairwise differences (corrected using Tukey's HSD) between categories (different shades of grey are for visual effect only; alpha levels are signified as  $*$ =0.05,  $**$ =0.01,  $***$ =0.001).

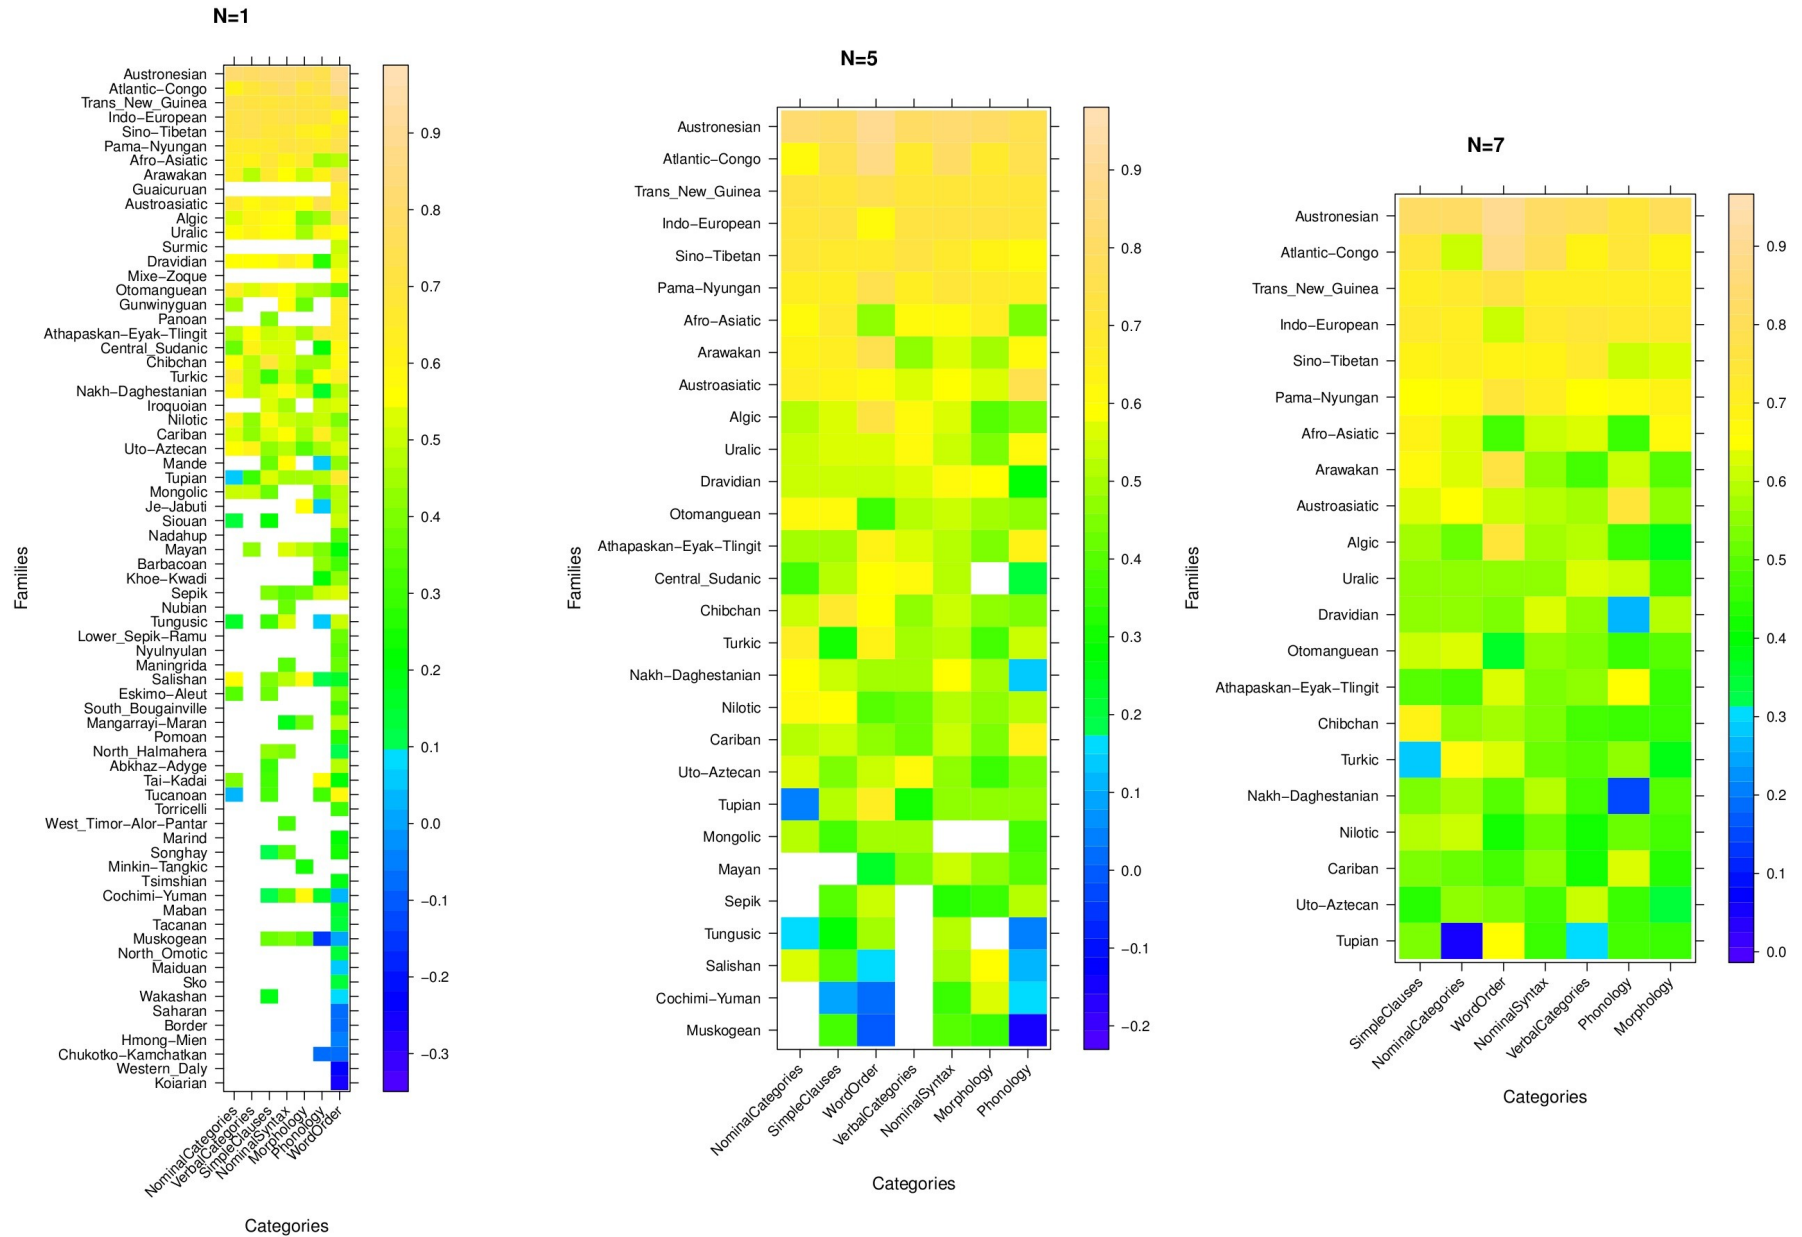

**Figure S17:** Intensity plots of the mean correlation (Pearson's  $r$ ) between branch length and number of nodes for each category and family across 4 datasets (MBH, MPH, BBH and BPH) and all outgroups. The categories are ordered from highest mean correlation (left) to the lowest (right), and the families from top to bottom. Shown are the boxplots for all families with data for at least one ( $N=1$ ), five ( $N=5$ ) or all ( $N=7$ ) categories of features.

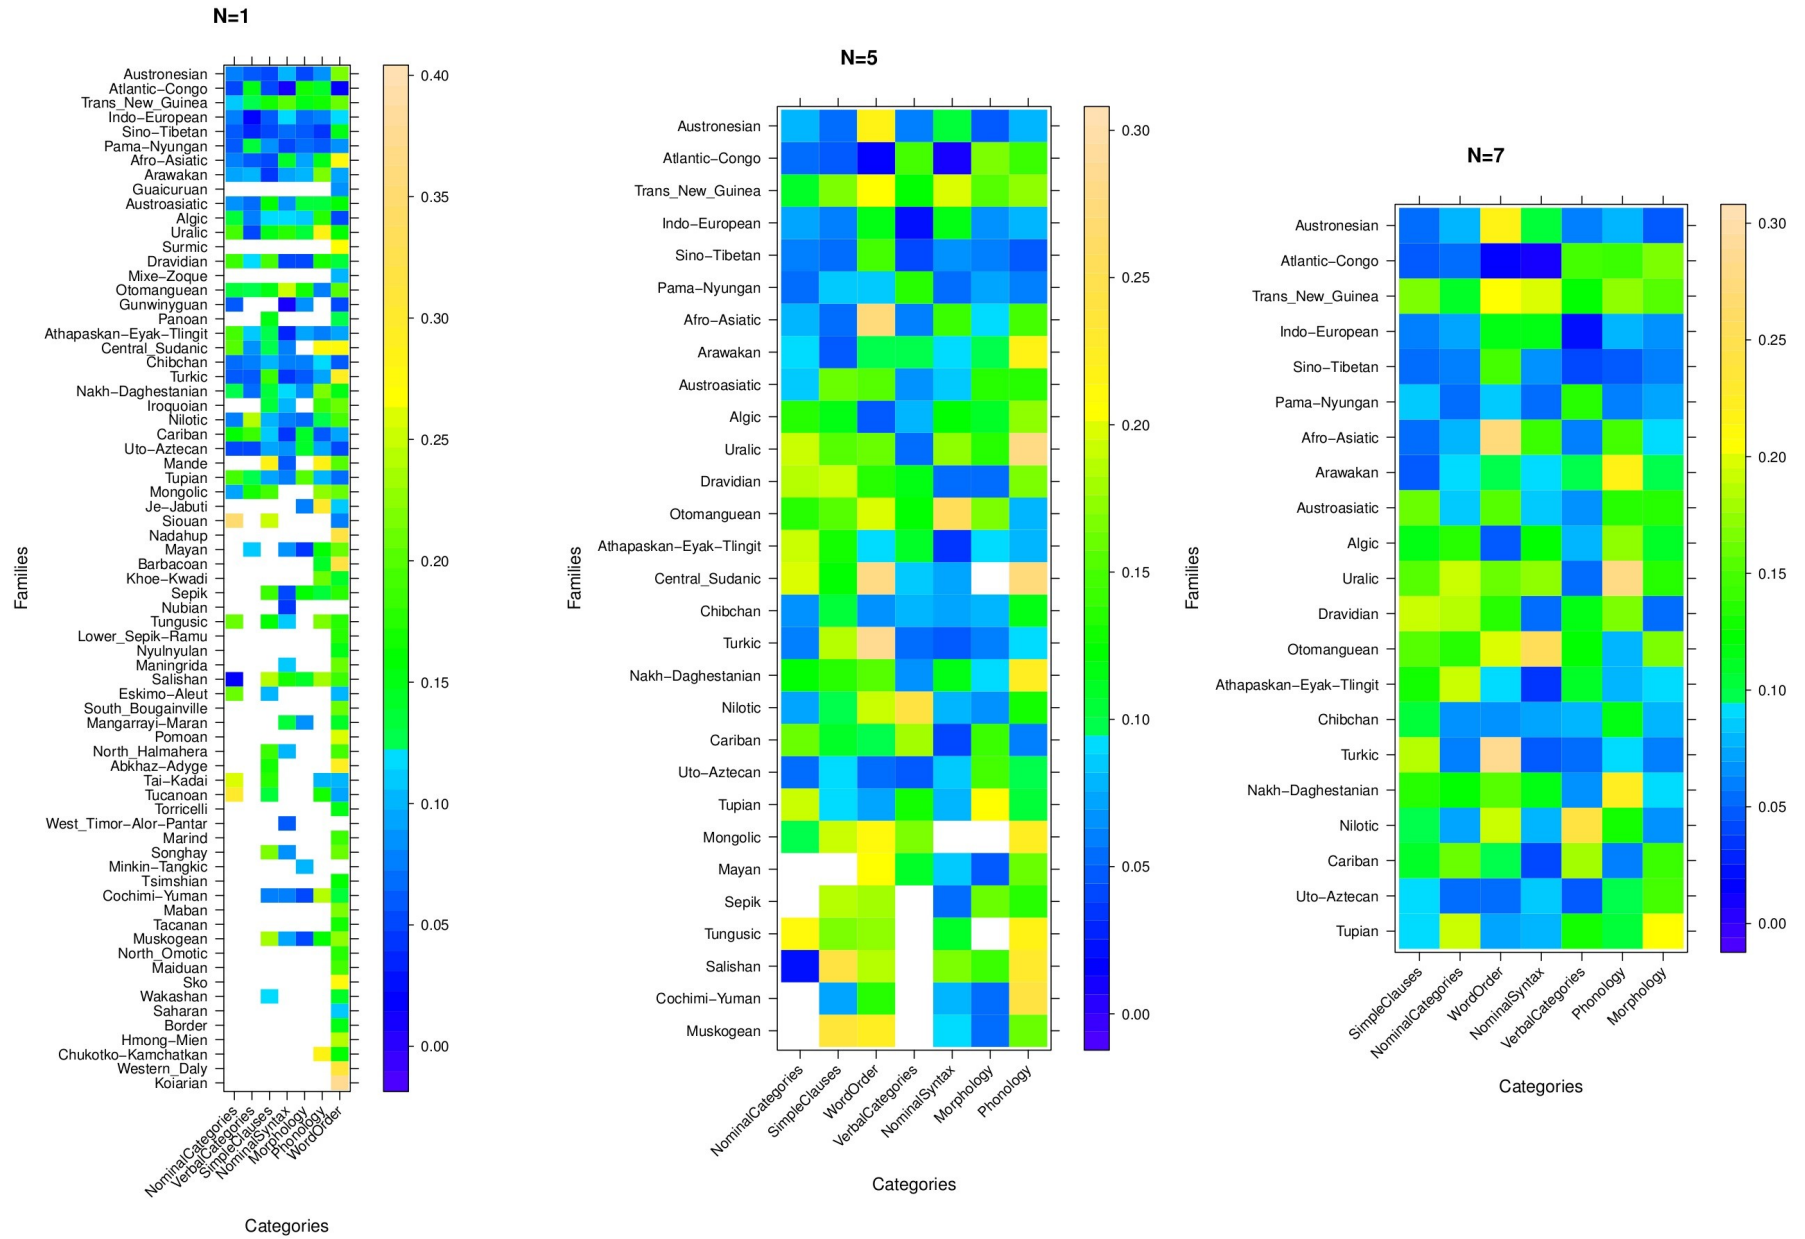

**Figure S18:** Intensity plots of the standard deviation of correlations (Pearson's  $r$ ) between branch length and number of nodes for each category and family (see Figure S17 for details).
